# Supplementary material
Source: PubMed Central journal article supplement (PMC11181451)
Supplement: media-1.pdf [file media-1.pdf]

# 1 **The Genetic Architecture of Biological Age in Nine Human Organ** 2 **Systems**

3 Junhao Wen<sup>1\*</sup>, Ye Ella Tian<sup>2</sup>, Ioanna Skampardoni<sup>3</sup>, Zhijian Yang<sup>3</sup>, Yuhan Cui<sup>3</sup>, Filippos  
4 Anagnostakis<sup>4</sup>, Elizabeth Mamourian<sup>3</sup>, Bingxin Zhao<sup>5</sup>, Arthur W. Toga<sup>6</sup>, Andrew Zalesky<sup>2</sup>,  
5 Christos Davatzikos<sup>3</sup>

6  
7 <sup>1</sup>Laboratory of AI and Biomedical Science (LABS), Stevens Neuroimaging and Informatics Institute, Keck School  
8 of Medicine of USC, University of Southern California, Los Angeles, California, USA

9 <sup>2</sup>Melbourne Neuropsychiatry Centre, Department of Psychiatry, Melbourne Medical School, The University of  
10 Melbourne, Melbourne, Victoria, Australia

11 <sup>3</sup>Artificial Intelligence in Biomedical Imaging Laboratory (AIBIL), Center for AI and Data Science for Integrated  
12 Diagnostics (AI<sup>2</sup>D), Perelman School of Medicine, University of Pennsylvania, Philadelphia, USA

13 <sup>4</sup>Department of Medical and Surgical Sciences, University of Bologna, 40126 Bologna, Italy

14 <sup>5</sup>Department of Statistics and Data Science, University of Pennsylvania, Philadelphia, PA, USA

15 <sup>6</sup>Laboratory of Neuro Imaging (LONI), Stevens Neuroimaging and Informatics Institute, Keck School of Medicine  
16 of USC, University of Southern California, Los Angeles, California, USA

17  
18 \*Corresponding author:

19 Junhao Wen, [junhaowe@usc.edu](mailto:junhaowe@usc.edu)

20 2025 Zonal Ave, Los Angeles, CA 90033, United States

21

22 **eMethod 1: The definition of genomic loci, independent significant SNP, lead SNP,**  
23 **candidate SNP**

24 **eText1: Sensitivity check analyses for the main GWAS of the nine BAGs using European**  
25 **ancestry**

26 **eText2: Phenome-wide association query using the GWAS Atlas platform**

27 **eText3: Sensitivity check analyses for the causality between the hepatic BAG and**  
28 **musculoskeletal BAG**

29 **eFigure 1: GWAS Manhattan plots for the brain BAG**

30 **eFigure 2: GWAS Manhattan plots for the cardiovascular BAG**

31 **eFigure 3: GWAS Manhattan plots for the eye BAG**

32 **eFigure 4: GWAS Manhattan plots for the hepatic BAG**

33 **eFigure 5: GWAS Manhattan plots for the immune BAG**

34 **eFigure 6: GWAS Manhattan plots for the metabolic BAG**

35 **eFigure 7: GWAS Manhattan plots for the musculoskeletal BAG**

36 **eFigure 8: GWAS Manhattan plots for the pulmonary BAG**

37 **eFigure 9: GWAS Manhattan plots for the renal BAG**

38 **eFigure 10: Bayesian colocalization analysis for the locus on chromosome 6 between the**  
39 **hepatic and musculoskeletal BAGs**

40 **eFigure 11: Exemplary genomic locus for each BAG in the nine human organ systems**

41 **eFigure 12: SNP-based heritability, beta coefficients, and alternative allele frequency using**  
42 **the brain-BAG comparable populations and different inclusion criteria for the SNPs**

43 **eFigure 13: Trumpet plots of the alternative allele frequency vs. the beta coefficient of the**  
44 **nine BAG GWASs**

45 **eFigure 14: Manhattan of and QQ plots for the four pulmonary features used to compute**  
46 **the pulmonary BAG**

47 **eFigure 15: Bayesian colocalization signal between the pulmonary BAG and FEV/FVC**

48 **eFigure 16: Beta coefficients of the significant colocalization signal between the pulmonary**  
49 **BAG and the four pulmonary features**

50 **eFigure 17: GSEA using sex-stratified GWAS results**

51 **eFigure 18: TEA correlations using sex-stratified GWAS results**

52 **eFigure 19: Genetic correlations using sex-stratified GWAS results**

53 **eFigure 20: Mendelian randomization sensitivity check for the hepatic BAG on the**  
54 **musculoskeletal BAG**

55 **eFigure 21: Mendelian randomization sensitivity check for the musculoskeletal BAG on the**  
56 **hepatic BAG**

57 **eFigure 22: Mendelian randomization sensitivity check for AD on the brain BAG**

58 **eFigure 23: Mendelian randomization sensitivity check for AD on the hepatic BAG**

59 **eFigure 24: Mendelian randomization sensitivity check for Crohn's disease on the hepatic**  
60 **BAG**

61 **eFigure 25: Mendelian randomization sensitivity check for body weight on the immune**  
62 **BAG**

63 **eFigure 26: Mendelian randomization sensitivity check for type 2 diabetes on the metabolic**  
64 **BAG**

65 **eFigure 27: Mendelian randomization sensitivity check for AD on the musculoskeletal BAG**

66 **eFigure 28: Mendelian randomization sensitivity check for IBD on the musculoskeletal**  
67 **BAG**

- 68 **eFigure 29: Mendelian randomization sensitivity check for PBC on the musculoskeletal**  
69 **BAG**
- 70 **eFigure 30: Mendelian randomization sensitivity check for weight on the musculoskeletal**  
71 **BAG**
- 72 **eFigure 31: Mendelian randomization sensitivity check for weight on the pulmonary BAG**
- 73 **eFigure 32: Mendelian randomization sensitivity check for AD on the renal BAG**
- 74 **eFigure 33: Mendelian randomization sensitivity check for weight on the renal BAG**
- 75 **eFigure 34: Mendelian randomization sensitivity check for the brain BAG on sleep**  
76 **duration**
- 77 **eFigure 35: Mendelian randomization sensitivity check for the cardiovascular BAG on**  
78 **triglycerides to lipids ratio in very large VLDL**
- 79 **eFigure 36: Mendelian randomization sensitivity check for the metabolic BAG on weight**
- 80 **eFigure 37: Mendelian randomization sensitivity check for the pulmonary BAG on weight**
- 81 **eFigure 38: Causal multi-organ network between the nine biological age gaps and 17**  
82 **clinical traits of chronic diseases, lifestyle factors, and cognition**
- 83 **eTable 1: Heritability estimates using the GCTA software**
- 84 **eTable 2: The beta coefficient and its SE estimate from the full sample vs. the down-**  
85 **sampled brain BAG comparable sample**
- 86 **eTable 3: Genetic correlation analyses between the pulmonary BAG and the four features**  
87 **used to derive the BAG.**
- 88 **eTable 4: Selected 41 clinical traits for genetic correlation analyses**
- 89 **eTable 5: Genetic correlations analyses between the nine BAGs and longevity, household**  
90 **income, and telomere length**
- 91 **eTable 6: Causal analysis using the LCV method**
- 92 **eTable 7: Selected 17 clinical traits for Mendelian randomization analyses**

93 **eMethod 1: The definition of genomic loci, independent significant SNP, lead SNP,**  
94 **candidate SNP**

95 FUMA defined the significant independent SNPs, lead SNPs, candidate SNPs, and genomic risk  
96 loci as follows (<https://fuma.ctglab.nl/tutorial#snp2gene>):

97 *Independent significant SNPs*

98 They are defined as SNPs with  $P \leq 5 \times 10^{-8}$  that are independent of each other at the user-defined  
99  $r^2$  (set to 0.6 in the current study). We further describe *candidate SNPs* as those in linkage  
100 disequilibrium (LD) with independent significant SNPs. FUMA then queries each candidate SNP  
101 in the GWAS Catalog to check whether any clinical traits have been reported to be associated with  
102 previous GWAS studies.

103 *Lead SNPs*

104 Lead SNPs are defined as independent significant SNPs that are also independent of each other at  
105  $r^2 < 0.1$ . If multiple independent significant SNPs are correlated at  $r^2 \geq 0.1$ , then the one with the  
106 lowest individual  $P$ -value becomes the lead SNP. If  $r^2$  threshold is set to 0.1 for the independent  
107 significant SNPs, then they would constitute the identical set as the lead SNPs by definition.  
108 FUMA thus advises setting  $r^2$  to be 0.6 or higher.

109 *Genomic risk loci*

110 FUMA defines genomic risk loci to include all independent signals physically close or overlapping  
111 in a single locus. First, independent significant SNPs dependent on each other at  $r^2 \geq 0.1$  are  
112 assigned to the same genomic risk locus. Then, independent significant SNPs with less than the  
113 user-defined distance (250 kb by default) away from one another are merged into the same  
114 genomic risk locus - the distance between two LD blocks of two independent significant SNPs is  
115 the distance between the closest points from each LD block. Each locus is represented by the SNP  
116 within the locus with the lowest  $P$ -value.  
117

118 **eText 1: Sensitivity check analyses for the main GWAS of the nine BAGs using European**  
 119 **ancestry**

120 We fully considered linkage disequilibrium and only included the independent significant SNPs  
 121 in this sensitivity check analysis. We exemplified this analysis in the split-sample GWAS. We  
 122 first used the Plink *clump* command (*--clump-p1 0.00000005 --clump-p2 0.05 --clump-r2 0.60 --*  
 123 *clump-kb 250*) to define the independent significant SNPs for the split1 and split2 GWAS. We  
 124 then included all the unique independent significant SNPs in either of the two split GWASs. We  
 125 then calculated three statistics to scrutinize the concordance of the two split GWASs:

- 126 •  $r$ - $\beta$ : Pearson's  $r$  between the two sets of  $\beta$  coefficients from the two splits;
- 127 •  $C$ - $\beta$ : concordance rate of the sign of the  $\beta$  coefficients from the two splits – if the same  
 128 SNP exerts the same protective/risk effect between the two splits;
- 129 •  $P$ - $\beta$ : the difference between the two sets of  $\beta$  coefficients from the two splits – if the two  
 130 sets of  $\beta$  coefficients (mean) statistically differ.

131 The two metrics were calculated for sex-stratified, fastGWA, and non-European GWAS  
 132 sensitivity check analyses.

133  
 134 **Split-sample GWAS**

135 **P-values:**

136 In the split1 GWAS, we found 6, 28, 20, 117, 62, 160, 37, 40, and 127 independent significant  
 137 SNPs for the brain, cardiovascular, eye, hepatic, immune, metabolic, musculoskeletal,  
 138 pulmonary, and renal BAGs, and 5, 30, 21, 110, 55, 164, 45, 43, and 139 independent significant  
 139 SNPs in split2 GWAS.

140 For the brain BAG, we obtained an  $r$ - $\beta$  of -0.06 (P-value=0.84;  $N=11$ ), but the two sets of  
 141 coefficients did not statistically differ ( $P$ - $\beta=0.70$ ). All the 11 independent significant SNPs  
 142 showed the same direction of effect ( $C$ - $\beta=1$ ). The low  $r$ - $\beta$  was likely due to small sample sizes in  
 143 the brain BAG. For all the other 8 BAGs, we obtained significantly high  $r$ - $\beta$  estimates ( $0.90 < r$ -  
 144  $\beta < 0.99$ ; P-value  $< 1 \times 10^{-19}$ ). The two sets of coefficients did not statistically differ ( $P$ - $\beta > 0.48$ ). All  
 145 independent significant SNPs showed the same direction of effect ( $C$ - $\beta=1$ ). Detailed results of  
 146 these SNPs are presented in **Supplementary eFile 2** for split-sample GWAS. The scatter plot of  
 147 the independent SNPs'  $\beta$  coefficients is shown below.

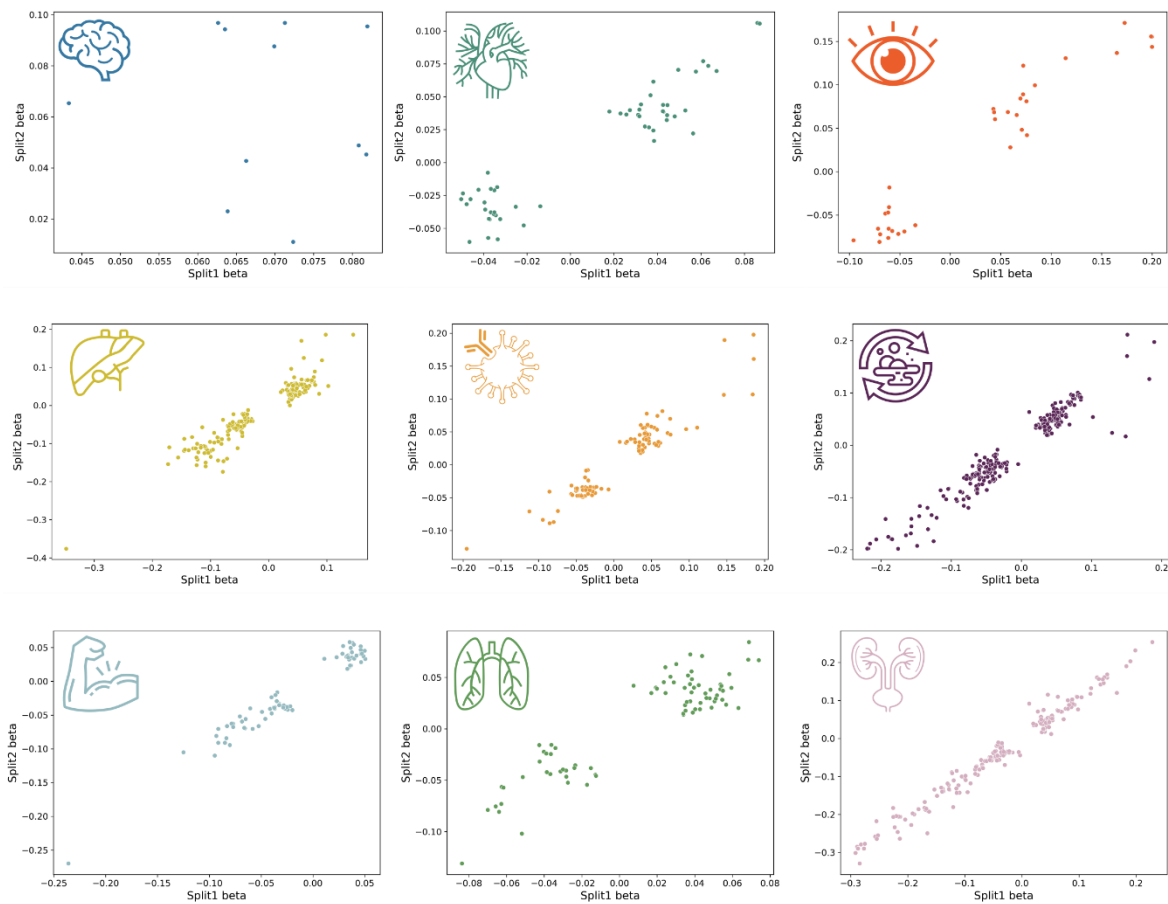

148  
149  
150

The figures present the scatter plots for the two sets of beta coefficients estimated from different splits.

## 151 Sex-stratified GWAS

152 In the female GWAS, we found 7, 24, 23, 286, 116, 142, 153, 30, and 131 independent  
 153 significant SNPs for the brain, cardiovascular, eye, hepatic, immune, metabolic, musculoskeletal,  
 154 pulmonary, and renal BAGs, and 7, 38, 22, 126, 275, 286, 42, 71, and 167 independent  
 155 significant SNPs in the male GWAS.

156 For the brain BAG, we obtained an  $r\text{-}\beta$  of -0.869 ( $P\text{-value}=5.29\times 10^{-5}$ ,  $N=14$ ), but the two  
 157 sets of coefficients did not statistically differ ( $P\text{-}\beta=0.66$ ). 13 out of the 14 independent significant  
 158 SNPs showed the same direction of effect ( $C\text{-}\beta=0.93$ ). The one independent significant SNP  
 159 (rs1634777) that had the opposite  $\beta$  sign in males compared to females was because the  $\beta$   
 160 coefficient was close to 0 ( $\beta=-0.000417162$ ) and was not statistically significant ( $P\text{-value}=0.99$ ).  
 161 For all the other 8 BAGs, we obtained significantly high  $r\text{-}\beta$  estimates ( $0.30 < r\text{-}\beta < 0.96$ ;  $P\text{-}$   
 162  $\text{value} < 2.57\times 10^{-7}$ ). The two sets of coefficients did not statistically differ ( $P\text{-}\beta > 0.40$ ), except for  
 163 the immune BAG ( $P\text{-}\beta=0.013$ ). Most independent significant SNPs showed the same direction of  
 164 effect ( $C\text{-}\beta > 0.89$ ), except for the immune (0.54) and musculoskeletal BAGs (0.70). Detailed  
 165 results of these SNPs are presented in **Supplementary eFile 3** for sex-stratified GWAS. The  
 166 scatter plot of the independent SNPs'  $\beta$  coefficients is shown below.

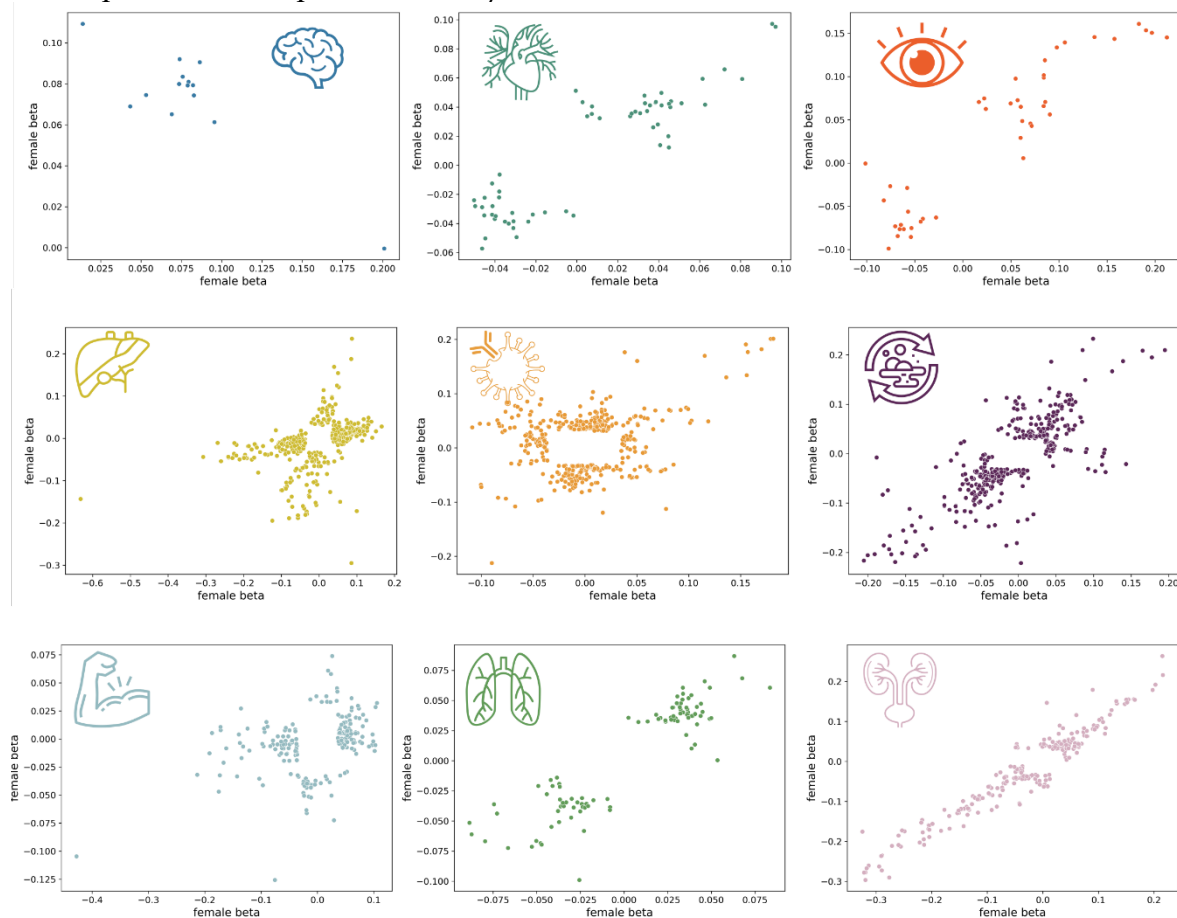

167 The figures present the scatter plots for the two sets of beta coefficients estimated from different  
 168 genders.  
 169

170 **fastGWA vs PLINK GWAS**

171 In the PLINK GWAS, we found 27, 124, 69, 289, 217, 422, 147, 272, and 331 independent  
 172 significant SNPs for the brain, cardiovascular, eye, hepatic, immune, metabolic, musculoskeletal,  
 173 pulmonary, and renal BAGs, and 27, 124, 69, 292, 218, 422, 148, 269, and 333 independent  
 174 significant SNPs in fastGWA GWAS.

175 For all the nine BAGs, we found almost perfect concordance between the PLINK and  
 176 fastGWA GWASs using the three proposed metrics ( $r\text{-}\beta=1$ ;  $C\text{-}\beta=1$ ;  $P\text{-}\beta=1$ ). Detailed results of  
 177 these SNPs are presented in **Supplementary eFile 4** for method-specific GWAS. The scatter plot  
 178 of the independent SNPs'  $\beta$  coefficients is shown below.

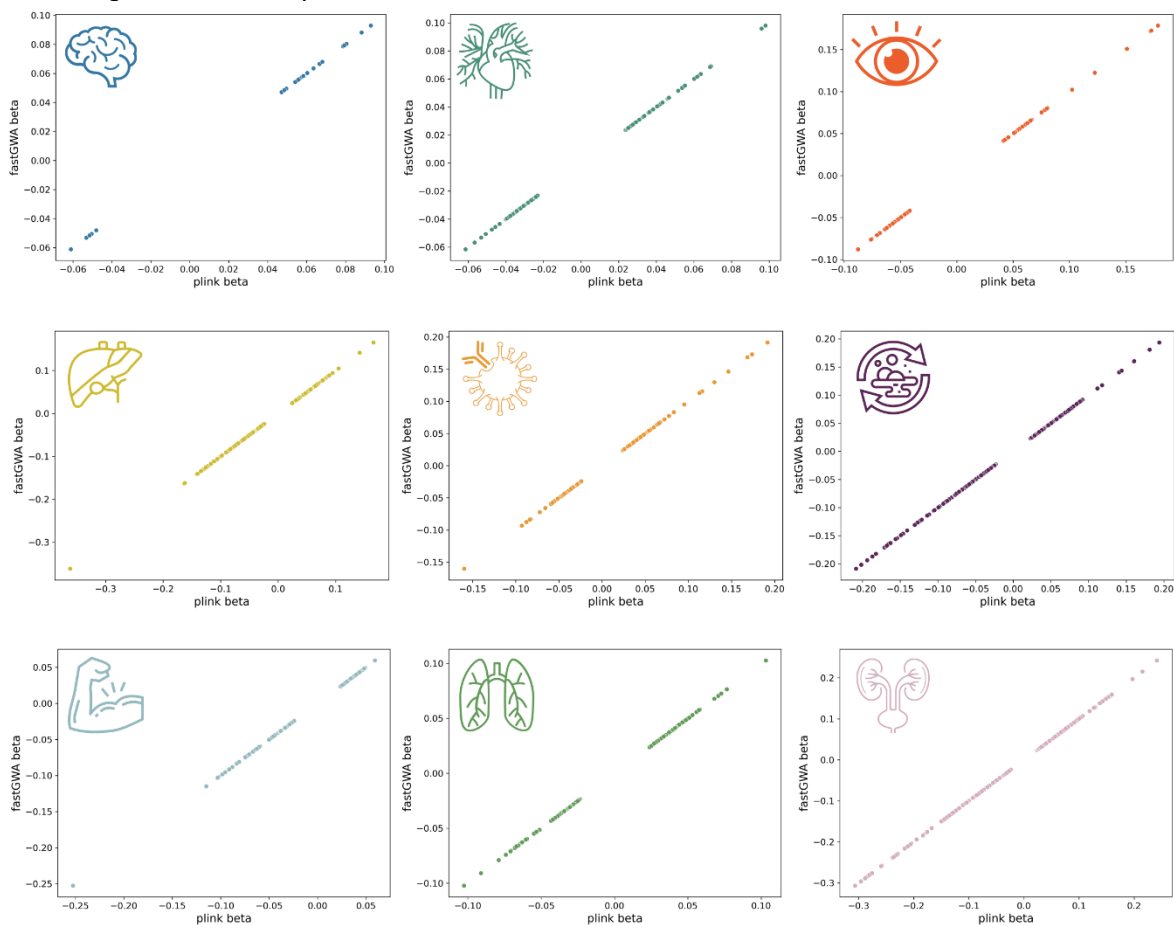

179 The figures present the scatter plots for the two sets of beta coefficients estimated from different  
 180 GWAS methods.  
 181



## 182 European vs. non-European GWAS

183 In the European GWAS, we found 27, 124, 69, 289, 217, 422, 147, 272, and 331 independent  
 184 significant SNPs for the brain, cardiovascular, eye, hepatic, immune, metabolic, musculoskeletal,  
 185 pulmonary, and renal BAGs, and 0, 2, 1, 16, 2, 23, 1, 1, and 35 independent significant SNPs in  
 186 non-European GWAS (with much smaller sample sizes).

187 For all the nine BAGs, we found a high concordance between the European and non-  
 188 EuroEuropean GWASs using the three proposed metrics ( $0.85 < r\text{-}\beta < 0.95$ ;  $0.89 < C\text{-}\beta < 1$ ). The two  
 189 sets of  $\beta$  coefficients did not significantly differ ( $P\text{-}\beta > 0.12$ ). Detailed results of these SNPs are  
 190 presented in **Supplementary eFile 5** for ancestry-specific GWAS. The scatter plot of the  
 191 independent SNPs'  $\beta$  coefficients is shown below.

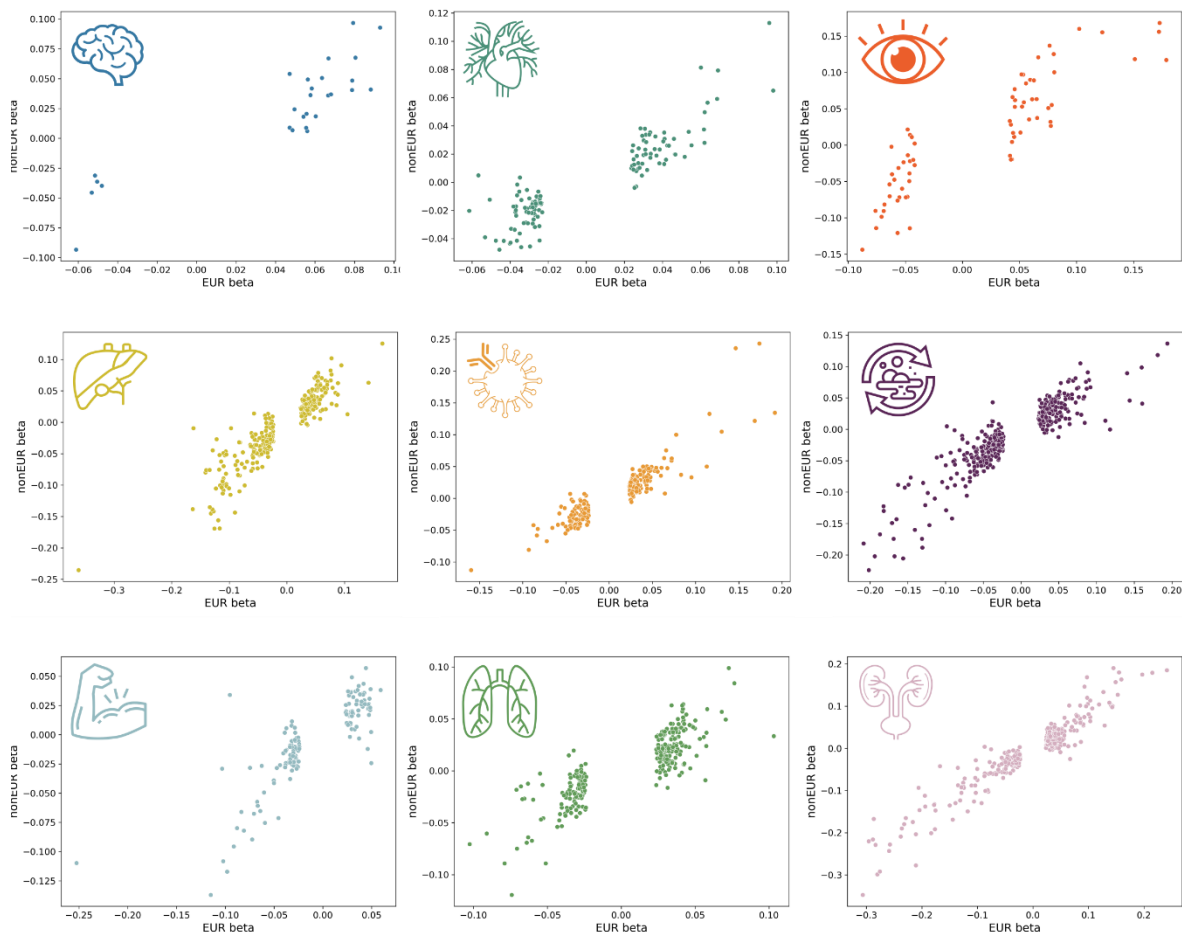

192 The figures present the scatter plots for the two sets of beta coefficients estimated from different  
 193 GWAS ancestry groups.  
 194

195 **eText 2: Phenome-wide association query using the GWAS Atlas platform**

196 To comprehensively encompass the genetic landscape reported in previous literature, we  
197 comparatively conducted a phenome-wide association query using the GWAS Atlas platform  
198 (<https://atlas.ctglab.nl/PheWAS>). We applied the same P-value threshold search criteria as those  
199 used in the EMBL-EBI GWAS Catalog ( $P\text{-value} < 1 \times 10^{-5}$ ). These findings are presented as a  
200 supplementary search to complement the results shown in **Fig. 2a**. The details of this  
201 comparative search are presented in **Supplementary eFile 7**.

202 It's important to note that the two platforms may exhibit variations in their curated  
203 GWAS datasets, the genome build versions utilized, and the specific P-value thresholds set for  
204 their search analyses by default. We tried our best to harmonize the query criteria. Hence, this  
205 comparative search was not exhaustive, and the results may differ. Rather, we intend to offer a  
206 broad overview of the two platforms commonly employed for phenome-wide association studies  
207 (PheWAS). Given the rapid updates in GWAS summary statistics in the field, it's worth  
208 mentioning that this comparative search was originally conducted on October 23, 2023, and  
209 revised on January 13, 2024, based on the reviewer's comments. The results from the GWAS  
210 Atlas are shown in the figure below.

211 In the GWAS Atlas platform, we identified 8,576 significant associations between the  
212 identified loci in our GWAS and clinical traits. The genomic loci associated with the brain BAG  
213 exhibited the highest proportion of associations (109 out of 308) with traits related to the brain.  
214 The brain BAG loci were also largely linked to many other traits related to other organ systems,  
215 evidencing inter-organ connections, including metabolic ( $N=78/308$ ), lifestyle factor ( $N=13/308$ ),  
216 neurodegenerative traits ( $N=5/308$ ), and immune ( $N=35/308$ ). For the eye BAG loci, most  
217 associations were found in the musculoskeletal ( $N=139/279$ ), eye ( $N=14/279$ ), and mental traits  
218 ( $N=19/279$ ), among many others.

219 For the seven body organ systems, among the loci associated with the cardiovascular  
220 BAG, most associations were observed with musculoskeletal traits ( $N=249/611$ ) and  
221 cardiovascular traits (166/611). 29 out of 1009 associations were related to hepatic traits (e.g.,  
222 blood protein, cirrhosis, and bilirubin) for the hepatic BAG loci. Among the loci associated with  
223 the immune BAG, abundant associations were found enriched in immune ( $N=467/1062$ ) traits.  
224 For the metabolic BAG loci, most associations were observed in metabolic traits ( $N=993/1990$ ).  
225 We found a significant intertwining of musculoskeletal systems with other organ systems in the  
226 GWAS Atlas platform. Details of the phenome-wide associations are presented in  
227 **Supplementary eFile 7**.

228

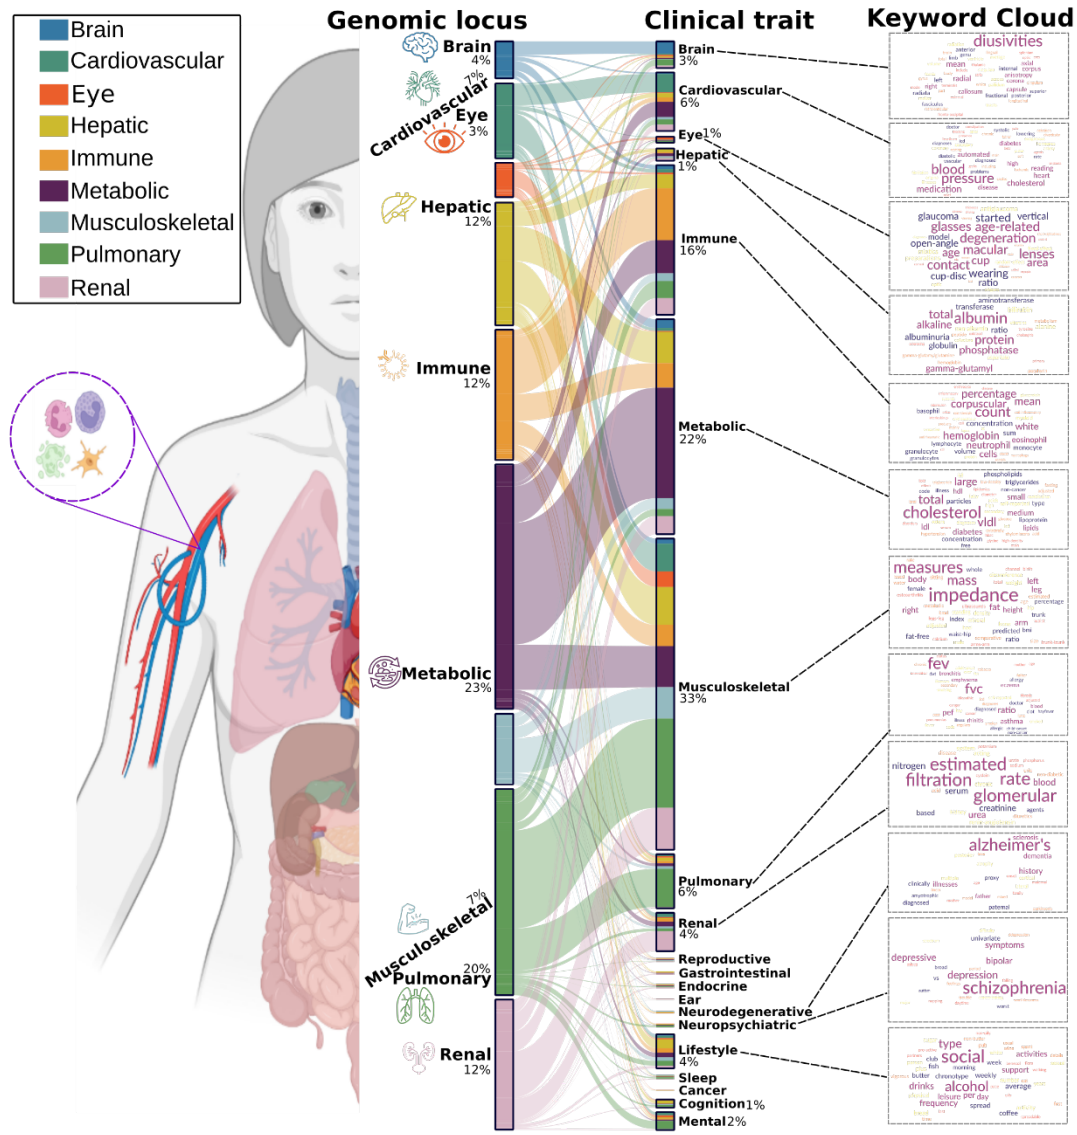

229  
230  
231  
232

**Figure.** We queried the clumped independent significant SNPs using the PheWAS functionality provided by the GWAS Atlas platforms.

233 **eText 3: Sensitivity check analyses for the causality between the hepatic BAG and**  
 234 **musculoskeletal BAG**

235  
 236 **A) Sensitivity analyses on body weight for the bi-directional causality between the hepatic**  
 237 **and musculoskeletal BAGs**

238 We conducted a revised Mendelian randomization analysis by introducing body weight as a  
 239 covariate in the split-sample GWASs for hepatic and musculoskeletal BAGs. In this approach,  
 240 we employed hepatic BAG as the exposure variable in split1 GWAS and musculoskeletal BAG  
 241 as the outcome variable in split2 GWAS. Likewise, we reversed the roles, using musculoskeletal  
 242 BAG as the exposure variable in split1 GWAS and hepatic BAG as the outcome variable in  
 243 split2 GWAS, thus assessing the inverse causal relationship. This methodology ensured the  
 244 absence of overlapping populations while effectively controlling for the influence of body  
 245 weight.

246 Compared to the original results, this bi-directional causality persisted while adjusting the  
 247 body weight as a covariate, shown in the tables below:

248  
 249 **1) GWAS without and with body weight as a covariate for the causal relationship from**  
 250 **the hepatic BAG to the musculoskeletal BAG.**

| Weight | Outcome (split2) | Exposure (split1) | Method                    | nSNP | BETA       | SE         | P          | OR         | CI_low     | CI_high    |
|--------|------------------|-------------------|---------------------------|------|------------|------------|------------|------------|------------|------------|
| N      | Musculoskeletal  | Hepatic           | MR Egger                  | 19   | 0.51783336 | 0.14070786 | 0.00185593 | 1.67838725 | 1.27385274 | 2.21138886 |
|        | Musculoskeletal  | Hepatic           | Weighted median           | 19   | 0.35295633 | 0.06606437 | 9.16E-08   | 1.42326899 | 1.25040832 | 1.62002649 |
|        | Musculoskeletal  | Hepatic           | Inverse variance weighted | 19   | 0.38344296 | 0.07834137 | 9.85E-07   | 1.46732785 | 1.25846644 | 1.71085295 |
|        | Musculoskeletal  | Hepatic           | Simple mode               | 19   | 0.15733154 | 0.10700058 | 0.15872332 | 1.17038357 | 0.94895908 | 1.44347395 |
|        | Musculoskeletal  | Hepatic           | Weighted mode             | 19   | 0.46614953 | 0.08121762 | 1.93E-05   | 1.59384531 | 1.35929067 | 1.86887391 |
| Y      | Musculoskeletal  | Hepatic           | MR Egger                  | 18   | 0.51517011 | 0.14245065 | 0.00231711 | 1.67392323 | 1.26613232 | 2.21305338 |
|        | Musculoskeletal  | Hepatic           | Weighted median           | 18   | 0.35613857 | 0.06002398 | 2.97E-09   | 1.42780539 | 1.26933301 | 1.60606258 |
|        | Musculoskeletal  | Hepatic           | Inverse variance weighted | 18   | 0.38926537 | 0.0792834  | 9.12E-07   | 1.47589615 | 1.2634801  | 1.72402356 |
|        | Musculoskeletal  | Hepatic           | Simple mode               | 18   | 0.24697399 | 0.11293776 | 0.04302518 | 1.28014581 | 1.02594689 | 1.59732761 |
|        | Musculoskeletal  | Hepatic           | Weighted mode             | 18   | 0.47542746 | 0.06925444 | 2.74E-06   | 1.60870171 | 1.40451037 | 1.84257891 |

251  
 252 **2) GWAS without and with body weight as a covariate for the causal relationship from**  
 253 **the musculoskeletal BAG to the hepatic BAG.**

| Weight | Outcome (split2) | Exposure (split1) | Method                    | nSNP | BETA       | SE         | P          | OR         | CI_low    | CI_high    |
|--------|------------------|-------------------|---------------------------|------|------------|------------|------------|------------|-----------|------------|
| N      | Hepatic          | Musculoskeletal   | MR Egger                  | 9    | 1.8282501  | 0.24293965 | 0.00013439 | 6.22298749 | 3.8654897 | 10.0182839 |
|        | Hepatic          | Musculoskeletal   | Weighted median           | 9    | 0.92114305 | 0.13768954 | 2.23E-11   | 2.51216028 | 1.9179781 | 3.2904178  |
|        | Hepatic          | Musculoskeletal   | Inverse variance weighted | 9    | 1.02402966 | 0.18103365 | 1.54E-08   | 2.78439235 | 1.9526818 | 3.97035541 |

|   |         |                 |                           |   |            |            |            |            |            |            |
|---|---------|-----------------|---------------------------|---|------------|------------|------------|------------|------------|------------|
|   | Hepatic | Musculoskeletal | Simple mode               | 9 | 1.20577311 | 0.18620161 | 0.000193   | 3.33933976 | 2.31826245 | 4.81014995 |
|   | Hepatic | Musculoskeletal | Weighted mode             | 9 | 1.25833413 | 0.13034769 | 1.10E-05   | 3.51955347 | 2.7260472  | 4.54403601 |
|   | Hepatic | Musculoskeletal | MR Egger                  | 9 | 1.69092352 | 0.35916855 | 0.00218827 | 5.42448802 | 2.68304718 | 10.9670342 |
|   | Hepatic | Musculoskeletal | Weighted median           | 9 | 0.85408009 | 0.13197703 | 9.71E-11   | 2.34921232 | 1.81376558 | 3.04272978 |
| Y | Hepatic | Musculoskeletal | Inverse variance weighted | 9 | 0.99179962 | 0.19767923 | 5.24E-07   | 2.69608204 | 1.83005923 | 3.97192521 |
|   | Hepatic | Musculoskeletal | Simple mode               | 9 | 1.23665687 | 0.15851732 | 5.23E-05   | 3.44408019 | 2.52429777 | 4.6990052  |
|   | Hepatic | Musculoskeletal | Weighted mode             | 9 | 1.27628794 | 0.15385855 | 3.36E-05   | 3.58331353 | 2.65043899 | 4.84453174 |

254

255

### B) Sensitivity analysis for the hepatic BAG on musculoskeletal BAG excluding the *APOE* gene

256

We conducted a revised Mendelian randomization analysis by excluding SNPs within the *APOE*

gene for the causal relationship from the hepatic BAG to the musculoskeletal BAGs; all other

significant causality did not involve the two common *APOE* gene SNPs (rs429358 and rs7412).

In this approach, we employed hepatic BAG as the exposure variable in split1 GWAS and

musculoskeletal BAG as the outcome variable in split2 GWAS.

Compared to the original results, this causality persisted while excluding the SNP (rs429358)

as an IV, shown in the tables below:

### GWAS without and with rs429358 as an IV for the causal relationship from the hepatic

### BAG to the musculoskeletal BAG.

262

263

264

265

| rs429358 | Outcome (split2) | Exposure (split1) | Method                    | nSNP | BETA       | SE         | P          | OR         | CI_low     | CI_high    |
|----------|------------------|-------------------|---------------------------|------|------------|------------|------------|------------|------------|------------|
|          | Musculoskeletal  | Hepatic           | MR Egger                  | 18   | 0.51522659 | 0.12736616 | 0.00093844 | 1.67401778 | 1.30419881 | 2.14870271 |
|          | Musculoskeletal  | Hepatic           | Weighted median           | 18   | 0.36478773 | 0.06339608 | 8.71E-09   | 1.44020827 | 1.27192489 | 1.63075657 |
| N        | Musculoskeletal  | Hepatic           | Inverse variance weighted | 18   | 0.41660503 | 0.07146014 | 5.55E-09   | 1.5168033  | 1.31856385 | 1.74484706 |
|          | Musculoskeletal  | Hepatic           | Simple mode               | 18   | 0.15924454 | 0.09710274 | 0.11938508 | 1.17262466 | 0.96940109 | 1.41845167 |
|          | Musculoskeletal  | Hepatic           | Weighted mode             | 18   | 0.45942325 | 0.07899932 | 2.07E-05   | 1.58316063 | 1.35606155 | 1.84829191 |
|          | Musculoskeletal  | Hepatic           | MR Egger                  | 19   | 0.51783336 | 0.14070786 | 0.00185593 | 1.67838725 | 1.27385274 | 2.21138886 |
|          | Musculoskeletal  | Hepatic           | Weighted median           | 19   | 0.35295633 | 0.06606437 | 9.16E-08   | 1.42326899 | 1.25040832 | 1.62002649 |
| Y        | Musculoskeletal  | Hepatic           | Inverse variance weighted | 19   | 0.38344296 | 0.07834137 | 9.85E-07   | 1.46732785 | 1.25846644 | 1.71085295 |
|          | Musculoskeletal  | Hepatic           | Simple mode               | 19   | 0.15733154 | 0.10700058 | 0.15872332 | 1.17038357 | 0.94895908 | 1.44347395 |
|          | Musculoskeletal  | Hepatic           | Weighted mode             | 19   | 0.46614953 | 0.08121762 | 1.93E-05   | 1.59384531 | 1.35929067 | 1.86887391 |

266

267

### C) Sensitivity analyses for metabolic BAG on body weight

We showcased sensitivity analyses to investigate potential violations of the three IV assumptions

(Method 3j). To illustrate this, we showcased the sensitivity analysis results for the causal effect

270

271 of the metabolic BAG on body weight (**Supplementary eFigure 33**). In a leave-one-out  
272 analysis, no single SNP overwhelmingly drove the overall effect. There was evidence for minor  
273 heterogeneity<sup>1</sup> of the causal effect amongst SNPs (Cochran's Q value=57.33, P-value<1x10<sup>-5</sup>).  
274 Some SNPs exerted opposite causal effects compared to the model using all SNPs. The scatter  
275 plot indicated two obvious SNP outliers (rs117233107 and rs33959228), and the funnel plot  
276 showed slight asymmetry. Finally, the MR Egger estimator allows for pleiotropic effects  
277 independent of the effect on the exposure of interest (i.e., the InSIDE assumption<sup>2</sup>). Our results  
278 from the Egger estimator showed a small but not significant positive intercept ( $3.62 \times 10^{-4} \pm 1.67 \times 10^{-3}$ , P-value=0.83), which may indicate that the IVW estimate is not likely biased<sup>2</sup>. We  
279 re-analyzed the IVW MR analyses by excluding the two outliers identified in **Supplementary**  
280 **eFigure 33** (rs117233107 and rs33959228), which led to a similar OR [0.94 (0.91, 0.97) vs. 0.95  
281 (0.92, 0.98)] and a less significant P-value [ $6.9 \times 10^{-4}$  vs.  $1.2 \times 10^{-3}$ ].  
282  
283

284 **eFigure 1: GWAS Manhattan plots for the brain BAG**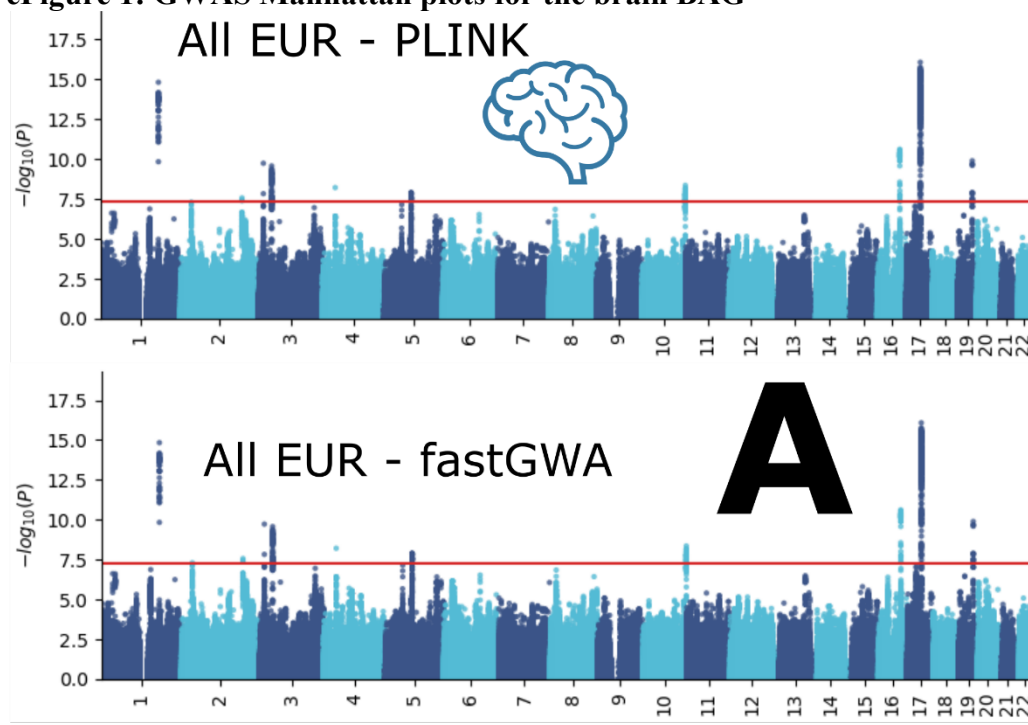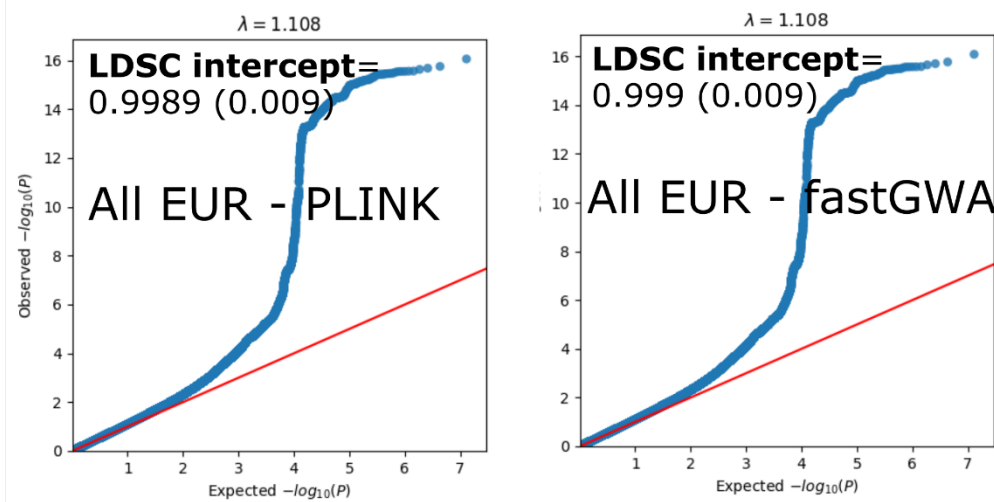

285

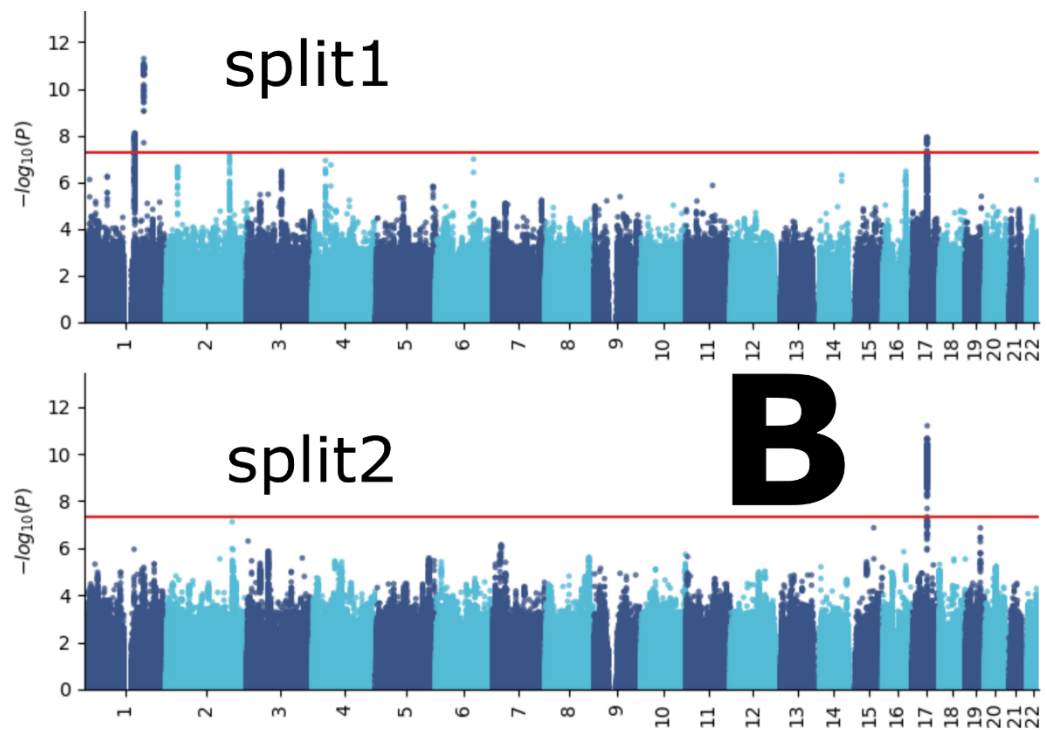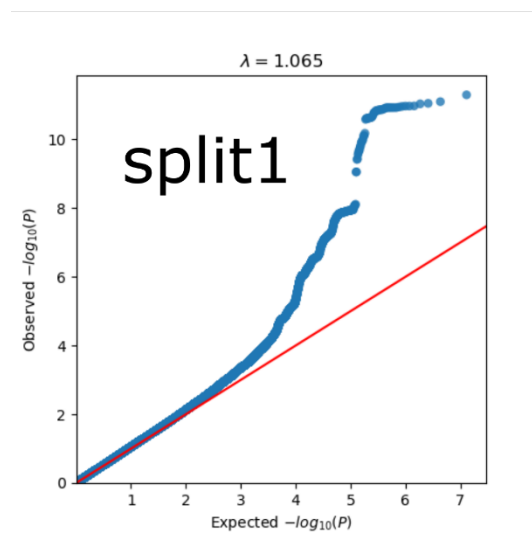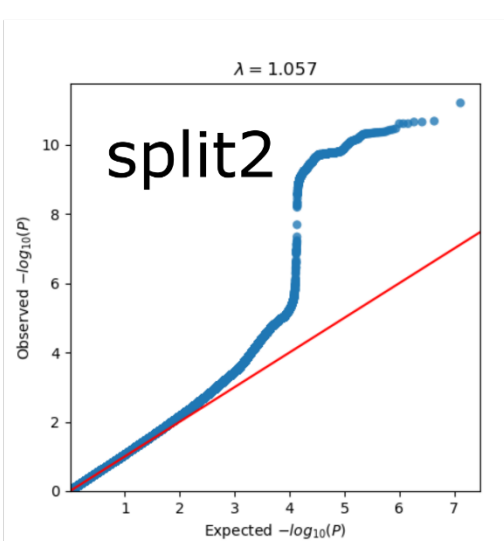



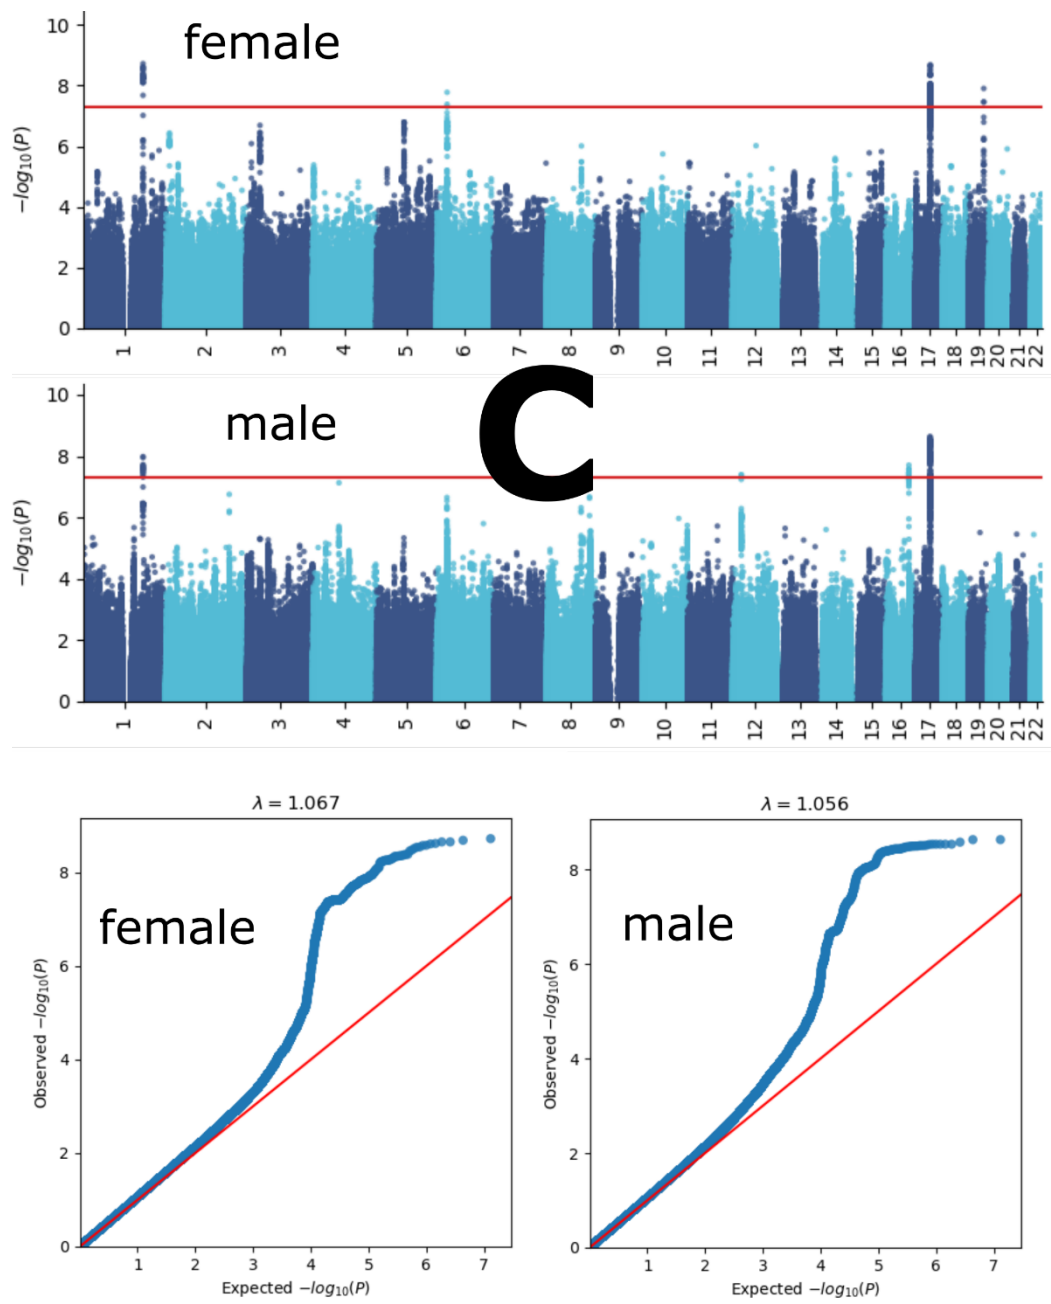

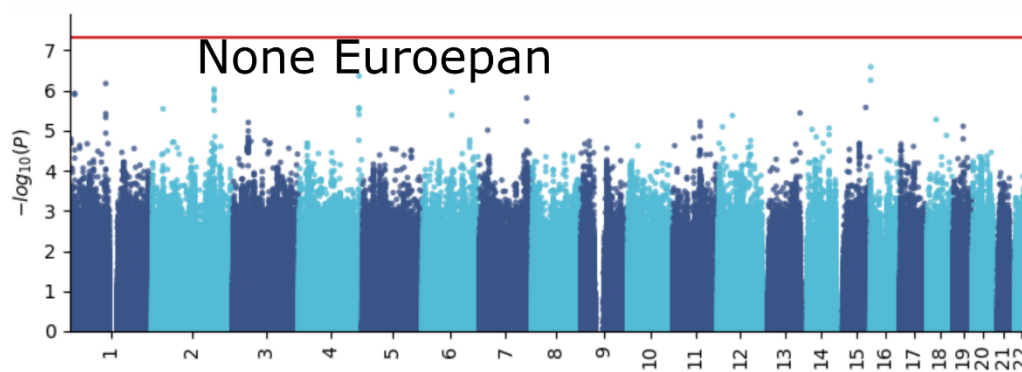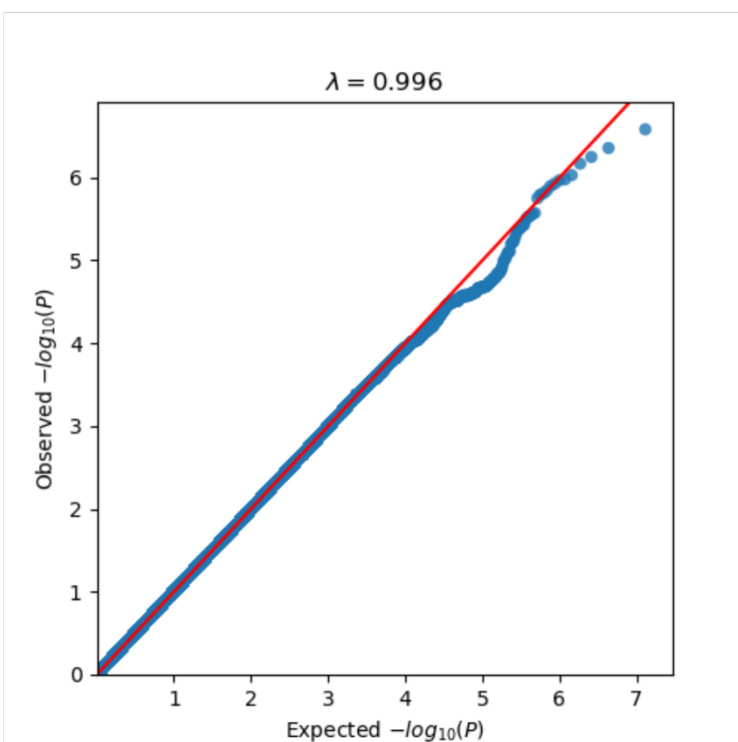

# D

288  
 289 Manhattan and QQ plots, along with genomic inflation factors and LDSC intercepts, are  
 290 displayed for the primary GWAS conducted on individuals of European ancestry ( $N=30,062$ )  
 291 using PLINK and fastGWA (**A**). Additionally, results are presented for split-sample GWAS  
 292 (split1 and split2, **B**), sex-stratified GWAS (female and male, **C**), and GWAS involving non-  
 293 European ancestry populations ( $N=4465$ , **D**).

294 eFigure 2: GWAS Manhattan plots for the cardiovascular BAG

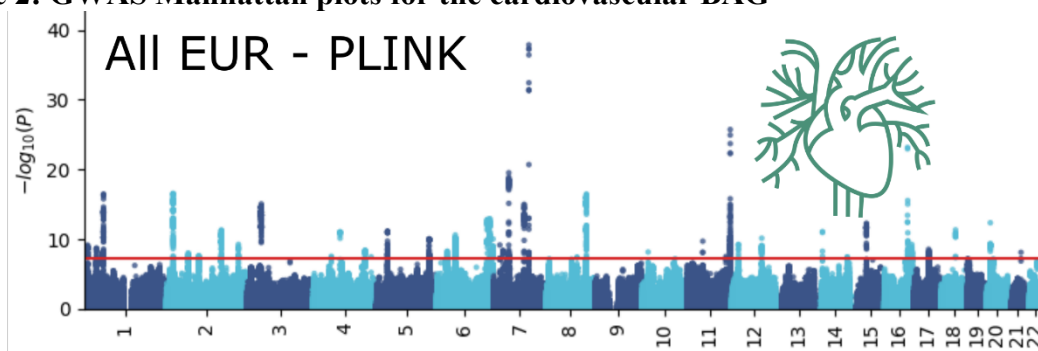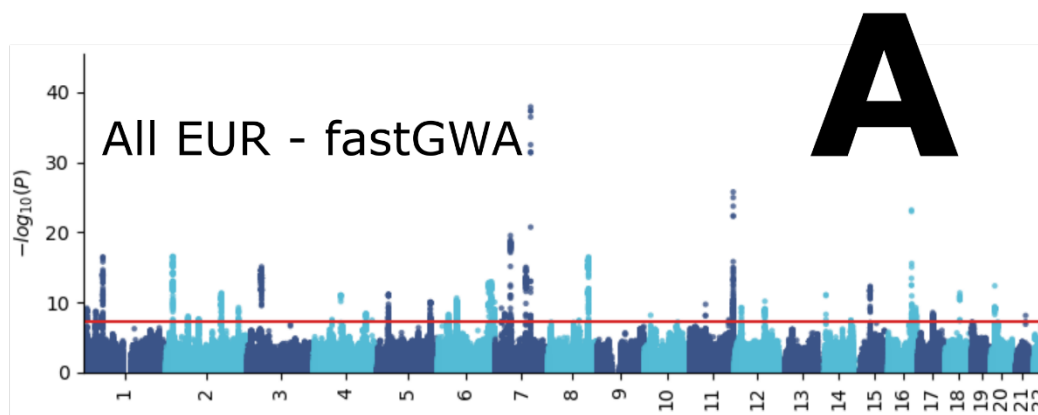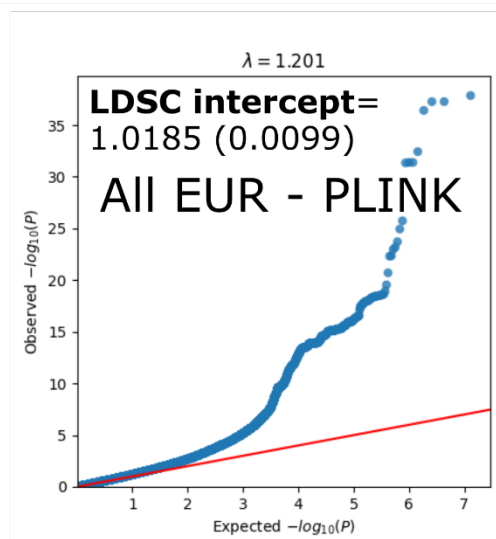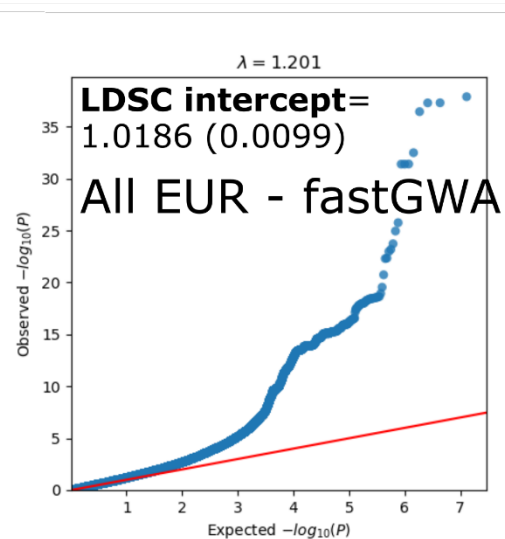

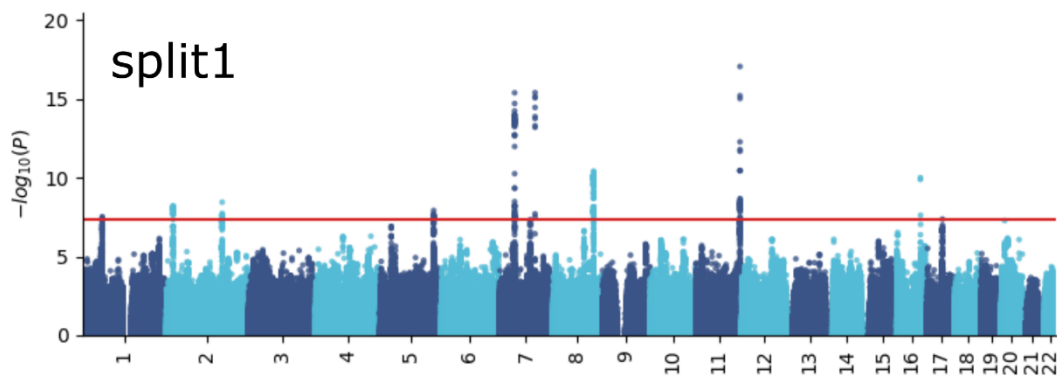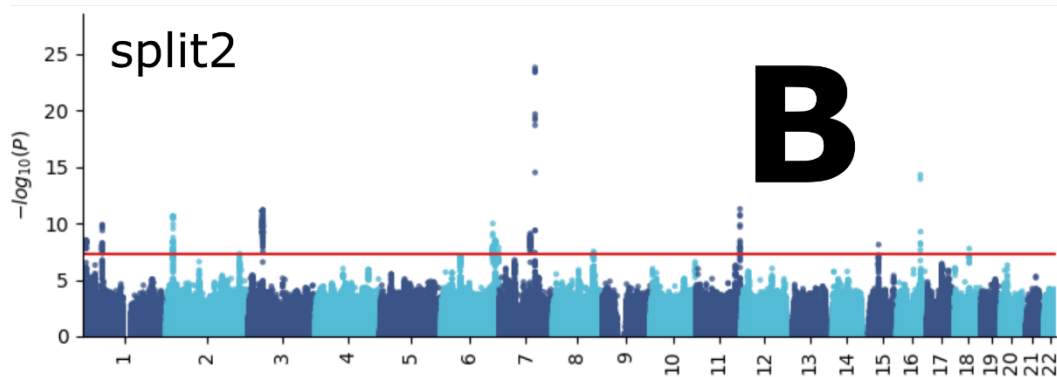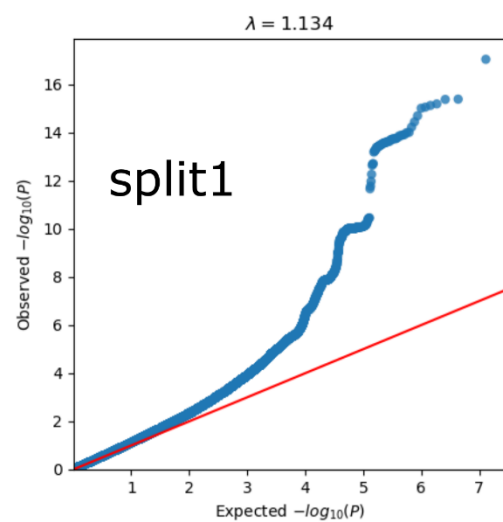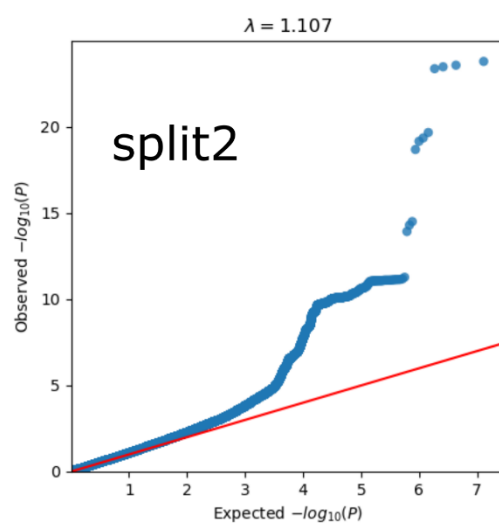

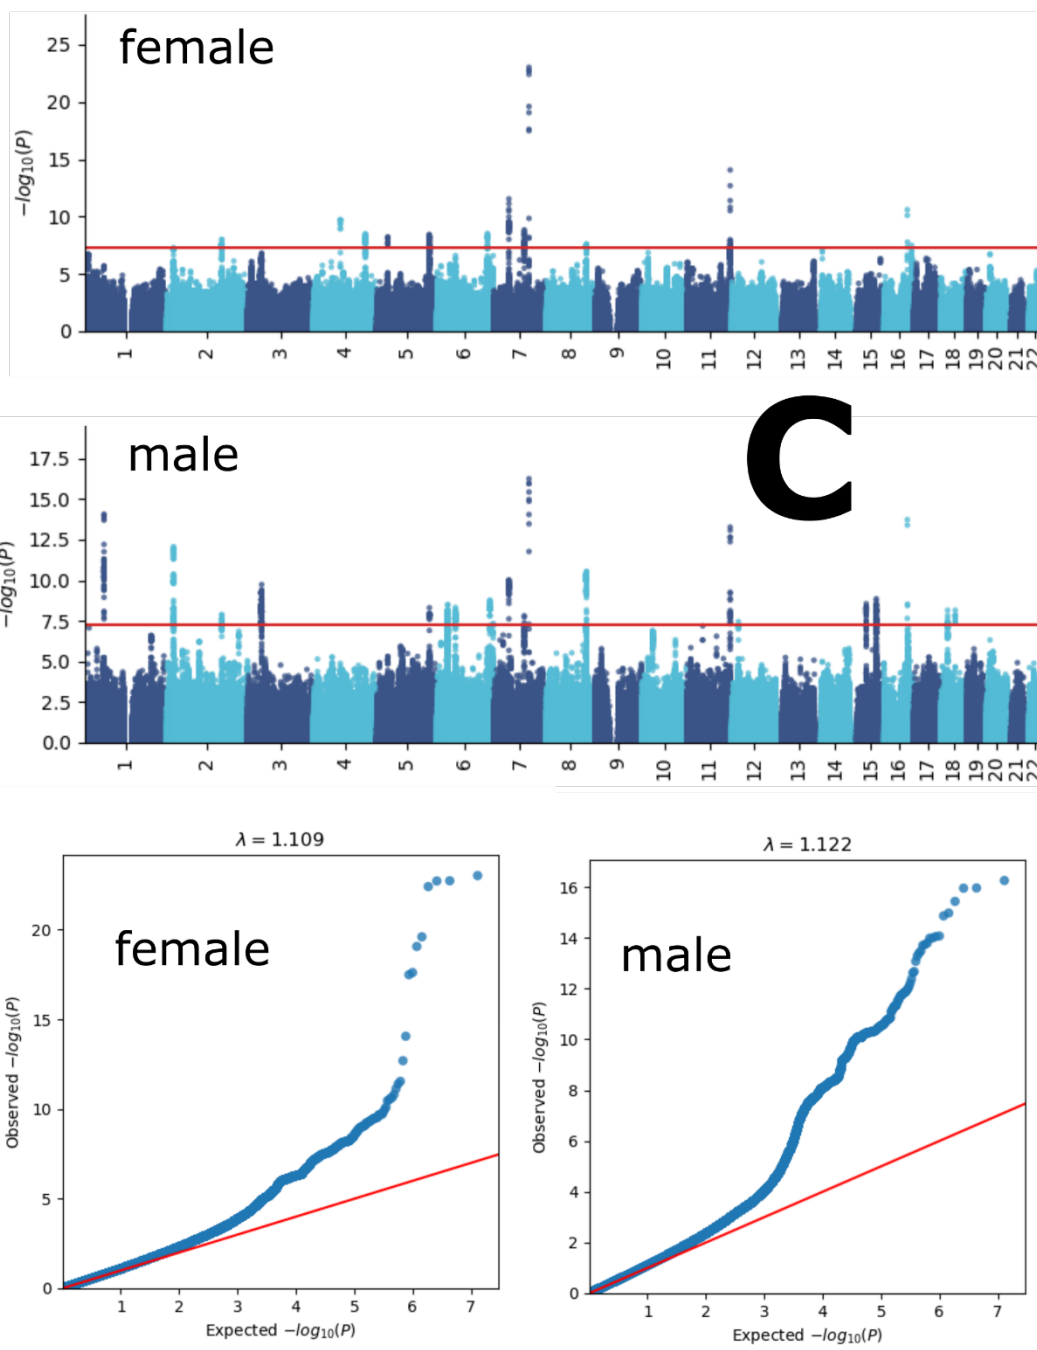

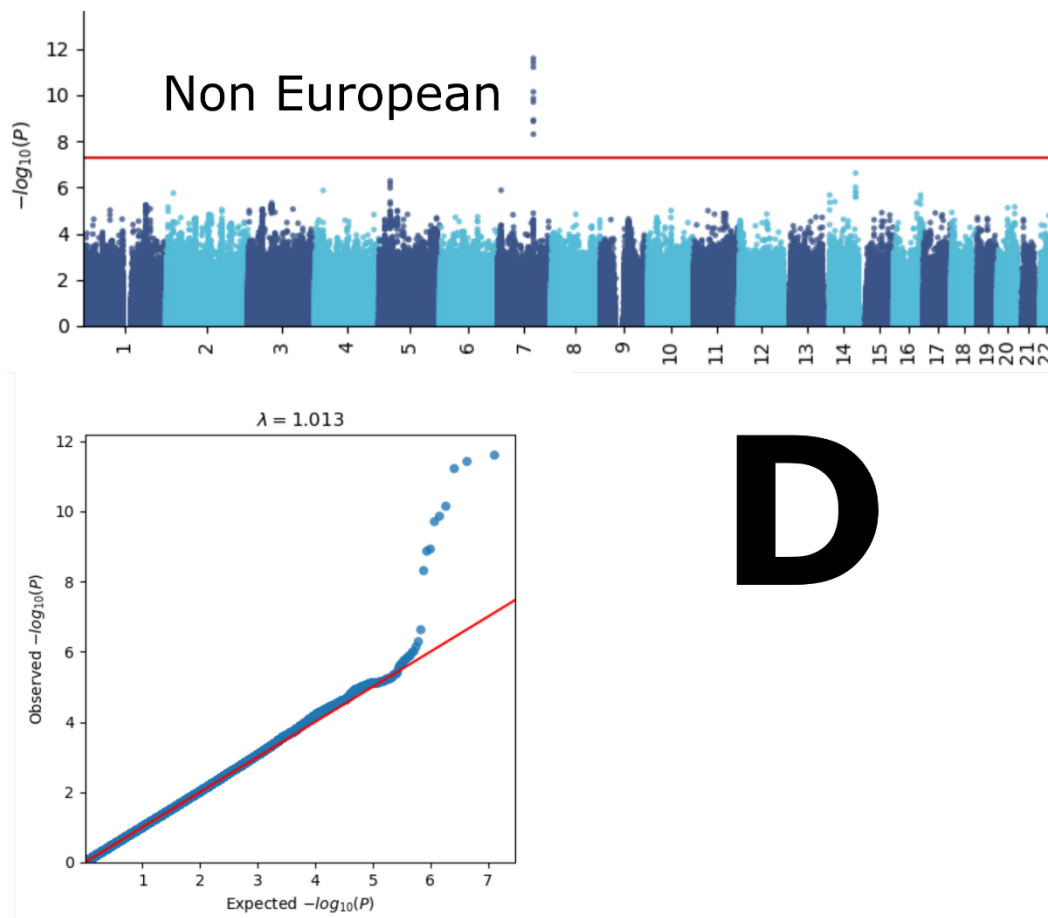

298  
 299 Manhattan and QQ plots, along with genomic inflation factors and LDSC intercepts, are  
 300 displayed for the primary GWAS conducted on individuals of European ancestry ( $N=111,386$ )  
 301 using PLINK and fastGWA (**A**). Additionally, results are presented for split-sample GWAS  
 302 (split1 and split2, **B**), sex-stratified GWAS (female and male, **C**), and GWAS involving non-  
 303 European ancestry populations ( $N=20,408$ , **D**).

304 eFigure 3: GWAS Manhattan plots for the eye BAG

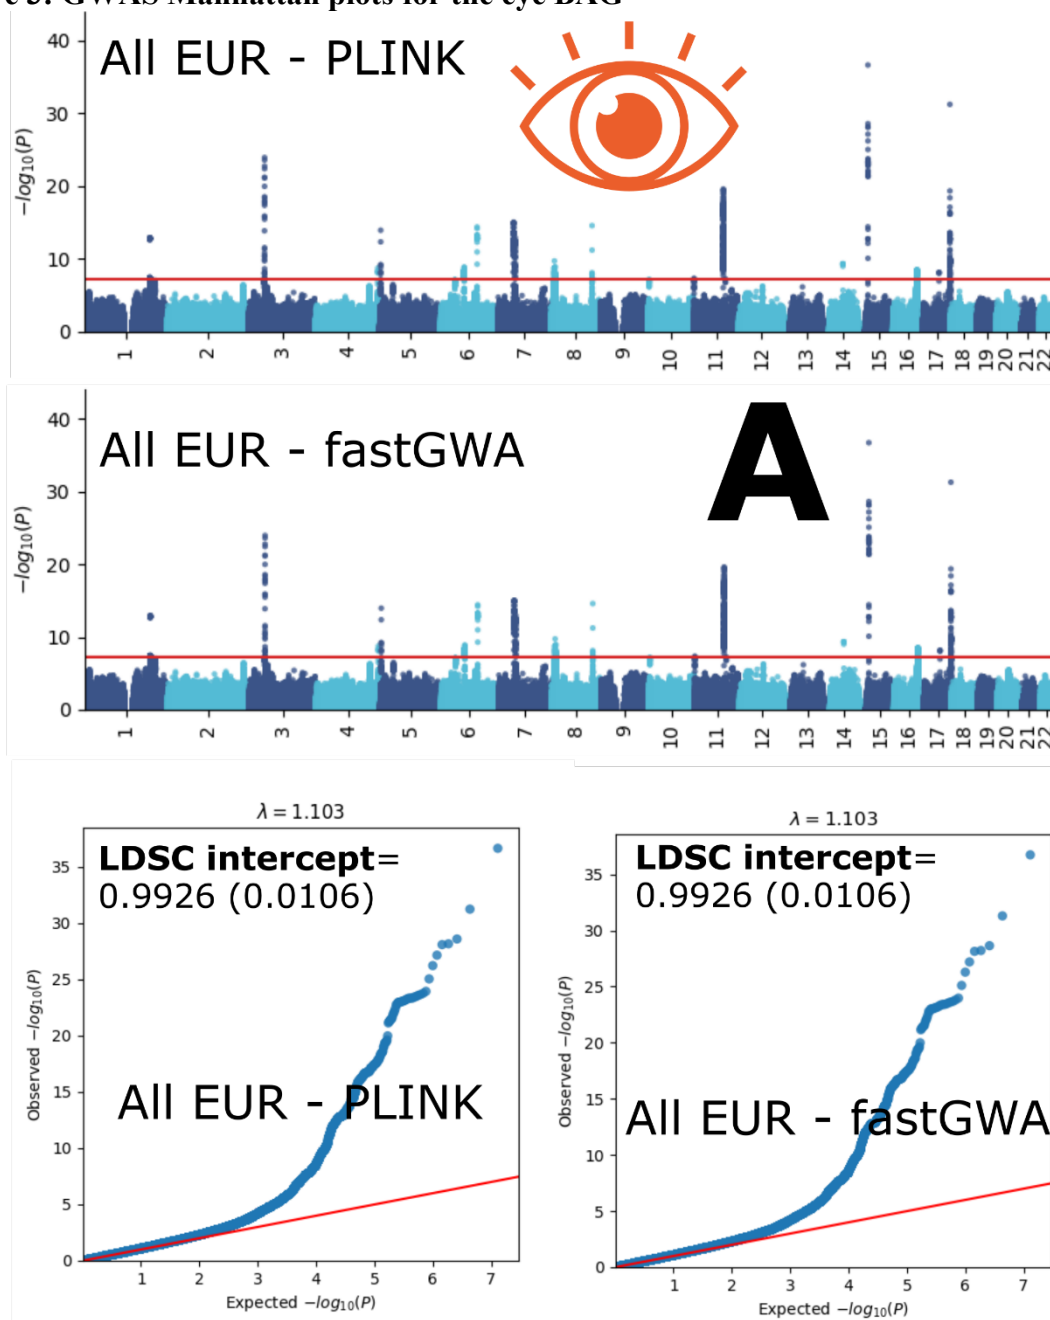

305

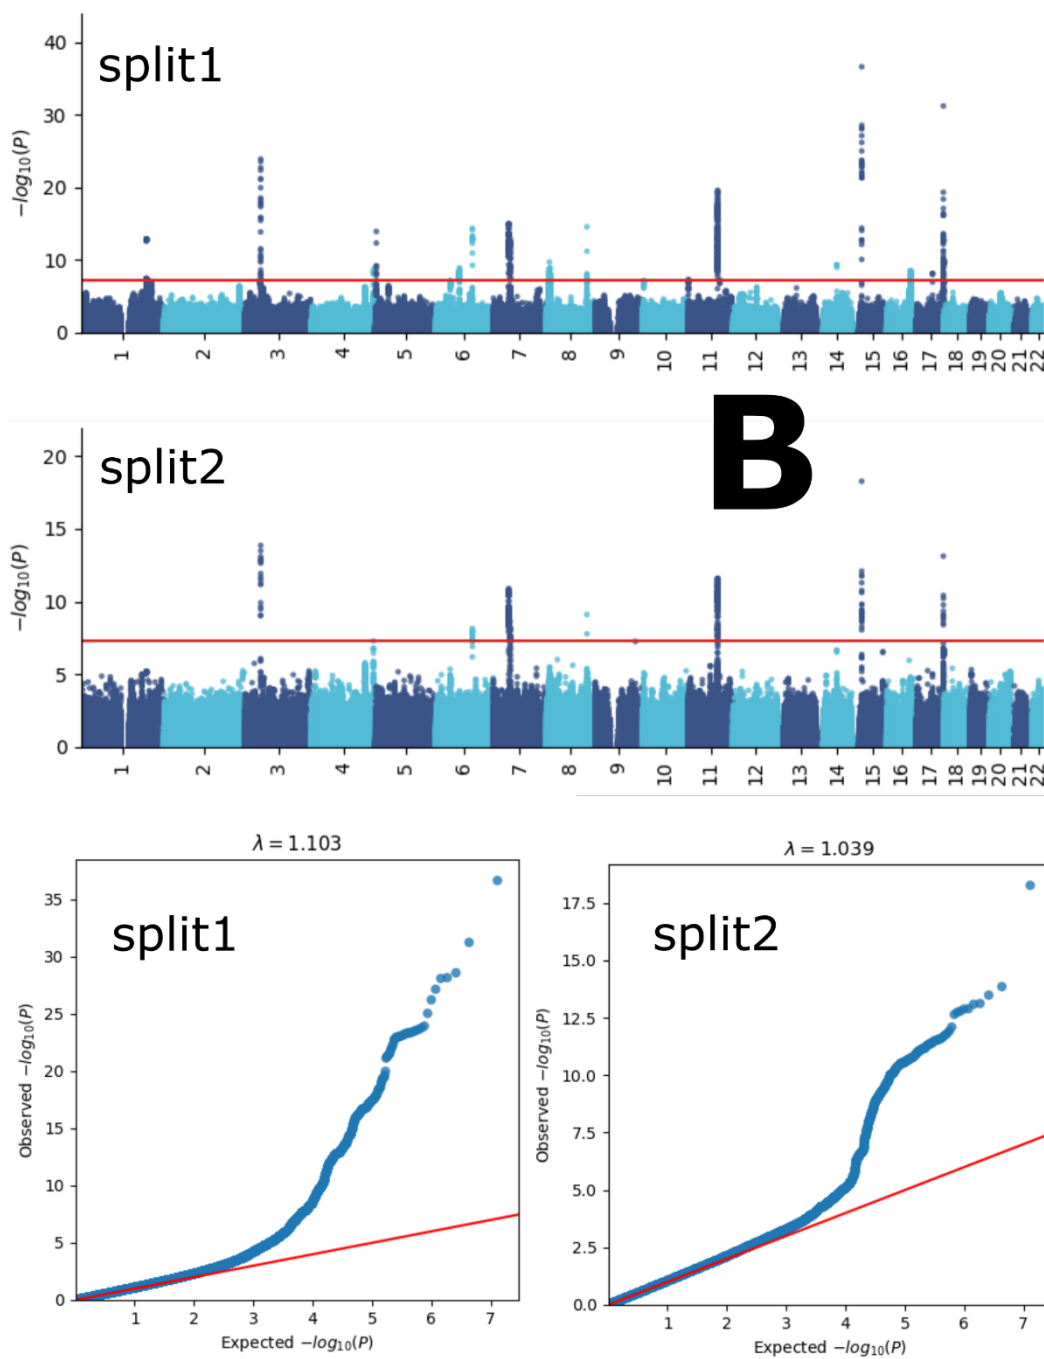



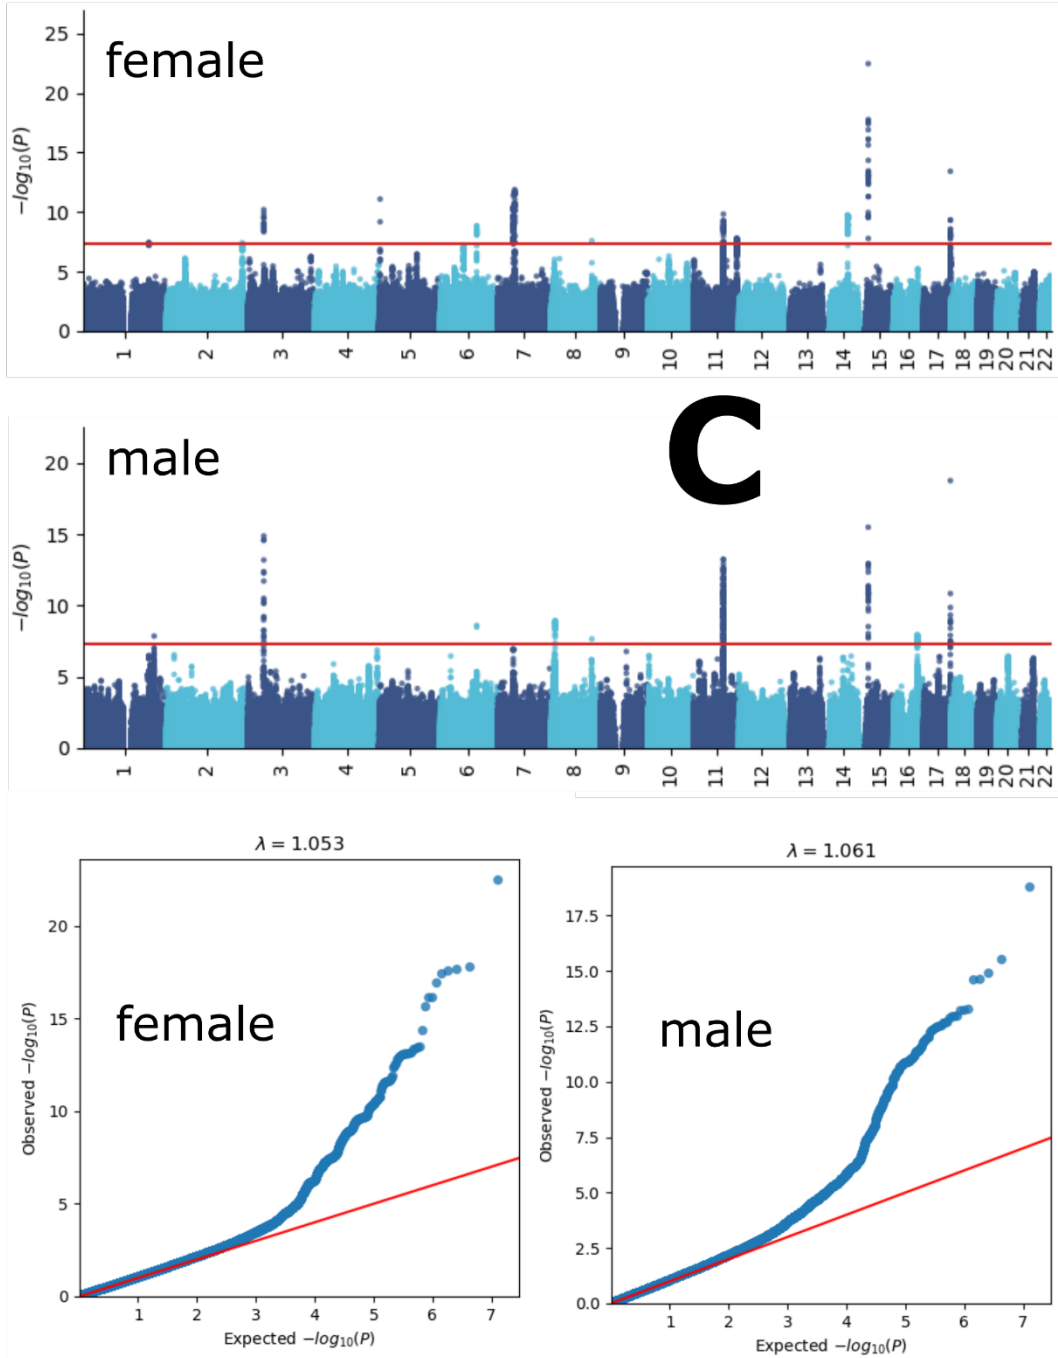

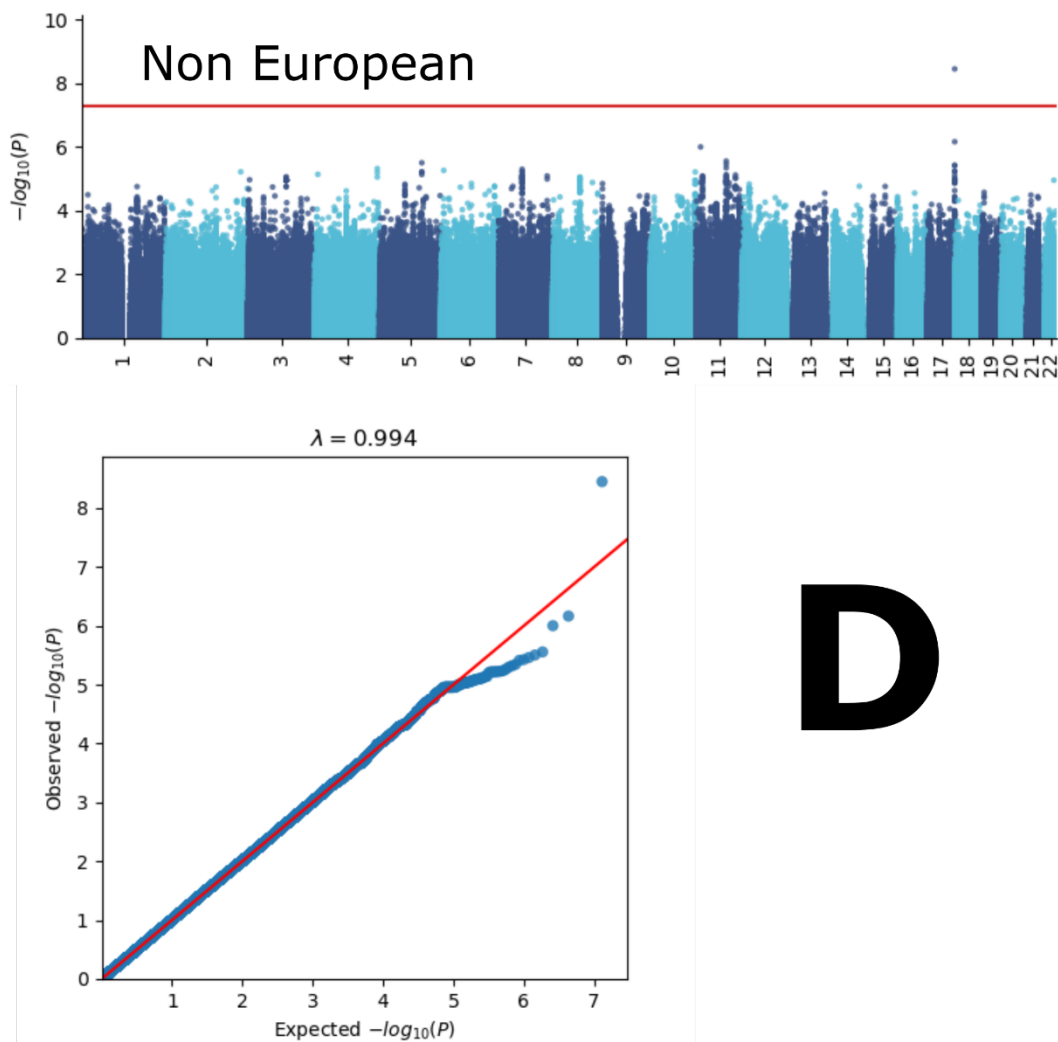

308  
 309 Manhattan and QQ plots, along with genomic inflation factors and LDSC intercepts, are  
 310 displayed for the primary GWAS conducted on individuals of European ancestry ( $N=36,004$ )  
 311 using PLINK and fastGWA (A). Additionally, results are presented for split-sample GWAS  
 312 (split1 and split2, B), sex-stratified GWAS (female and male, C), and GWAS involving non-  
 313 European ancestry populations ( $N=3407$ , D).

314 eFigure 4: GWAS Manhattan plots for the hepatic BAG

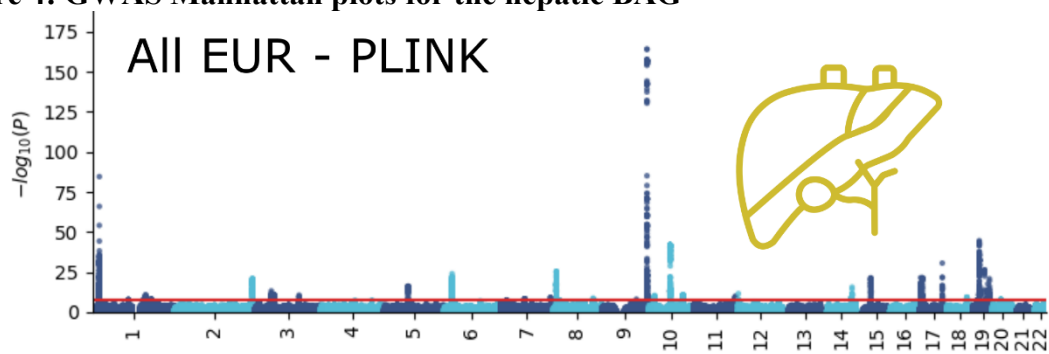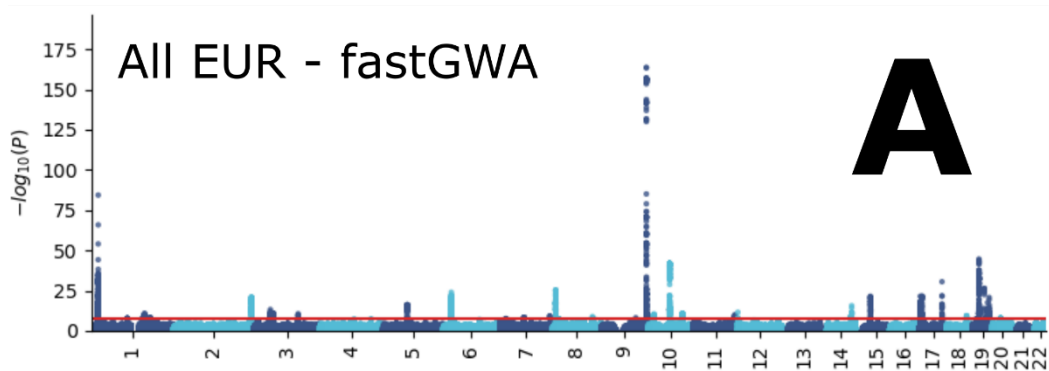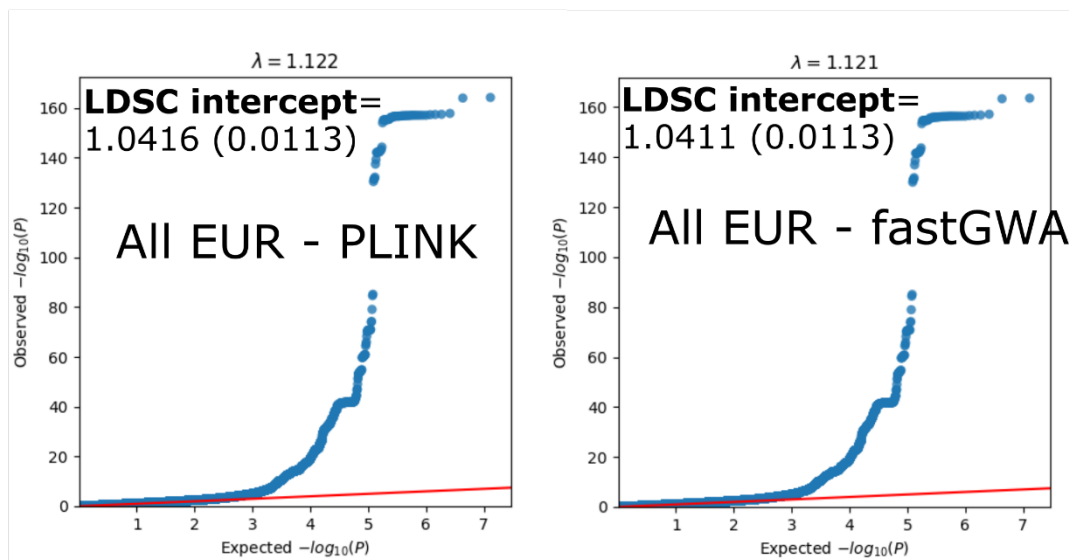

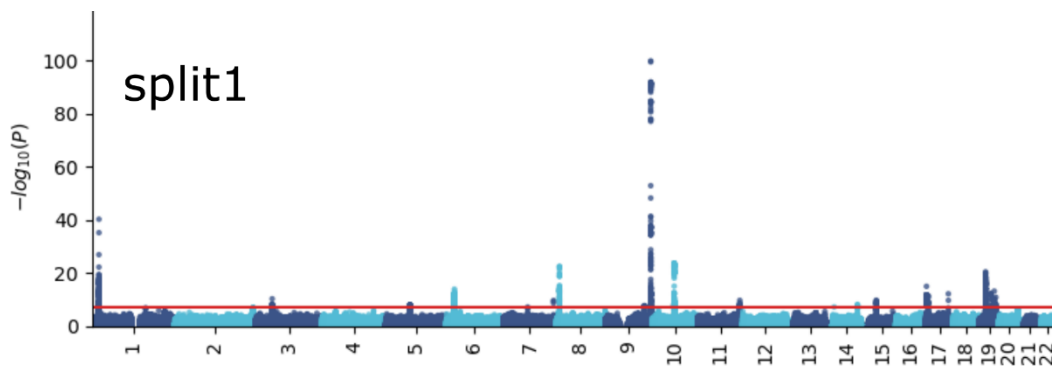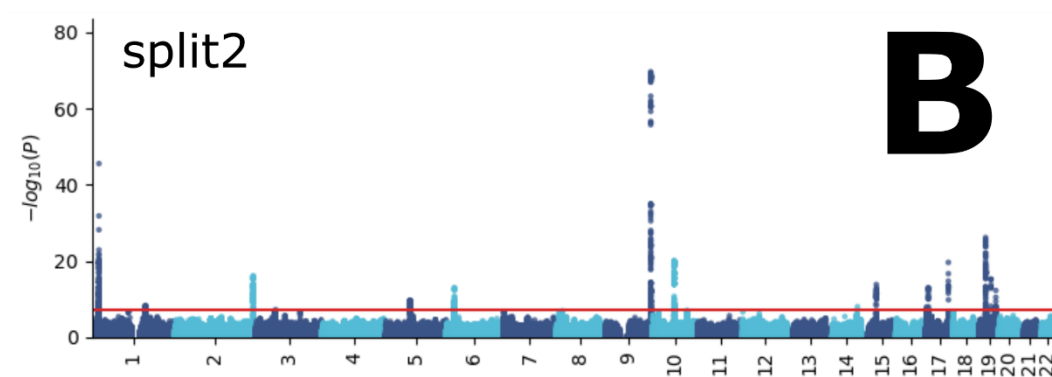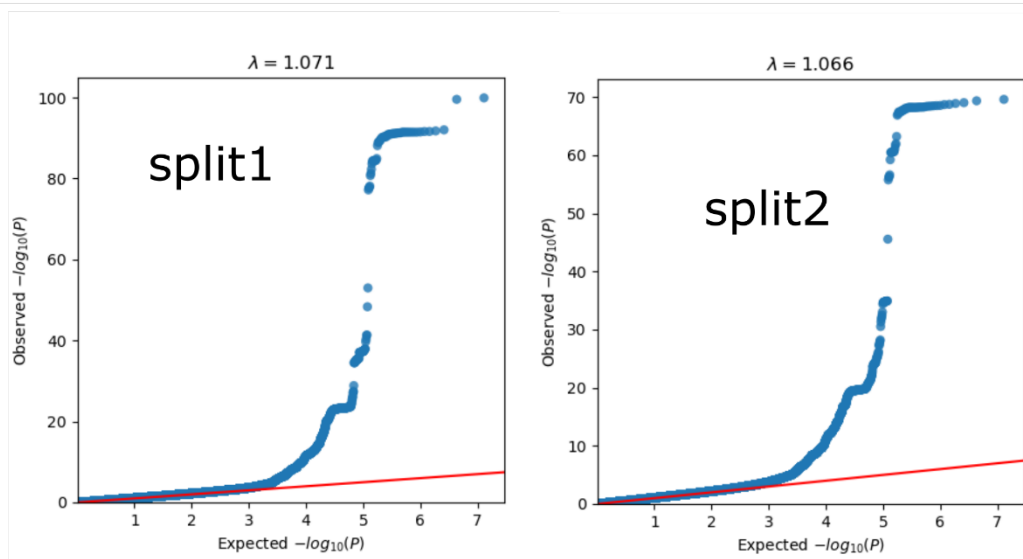

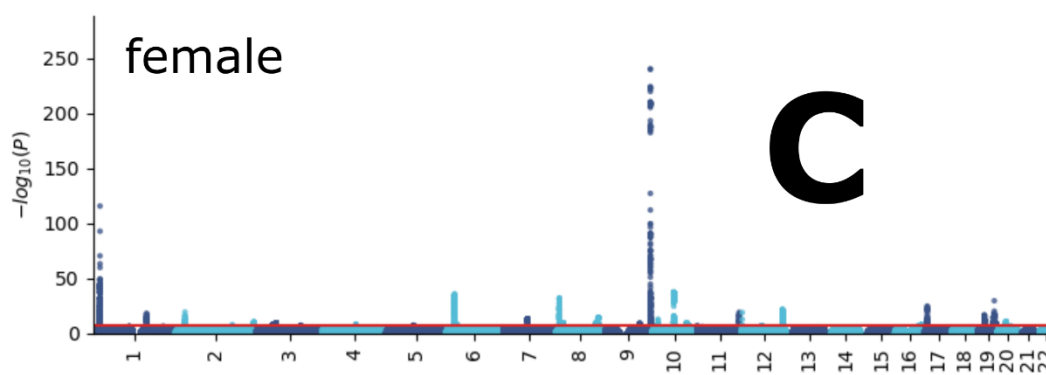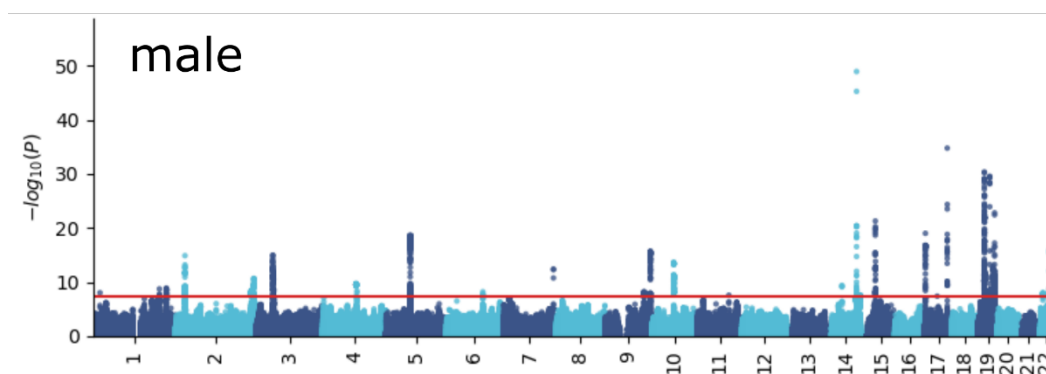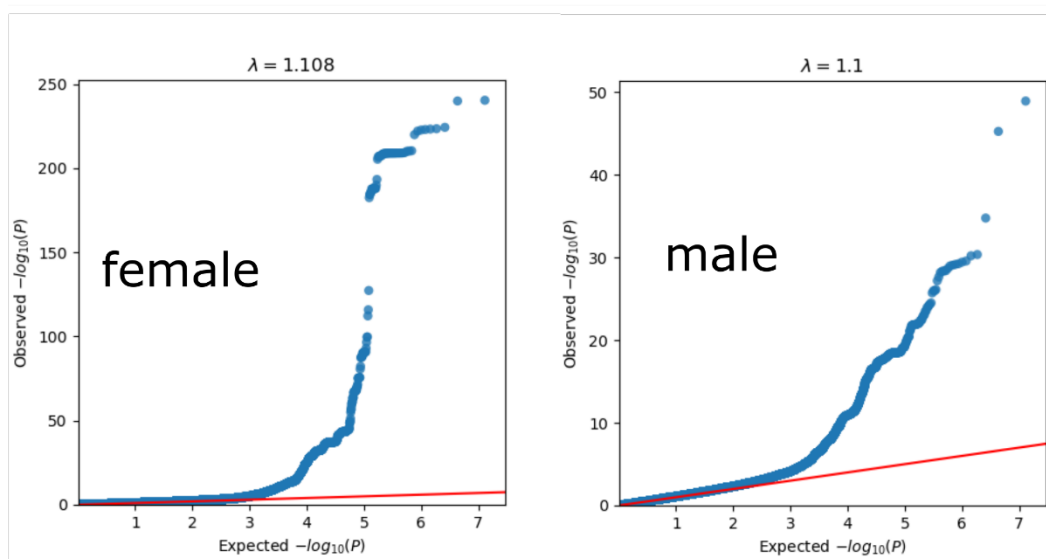

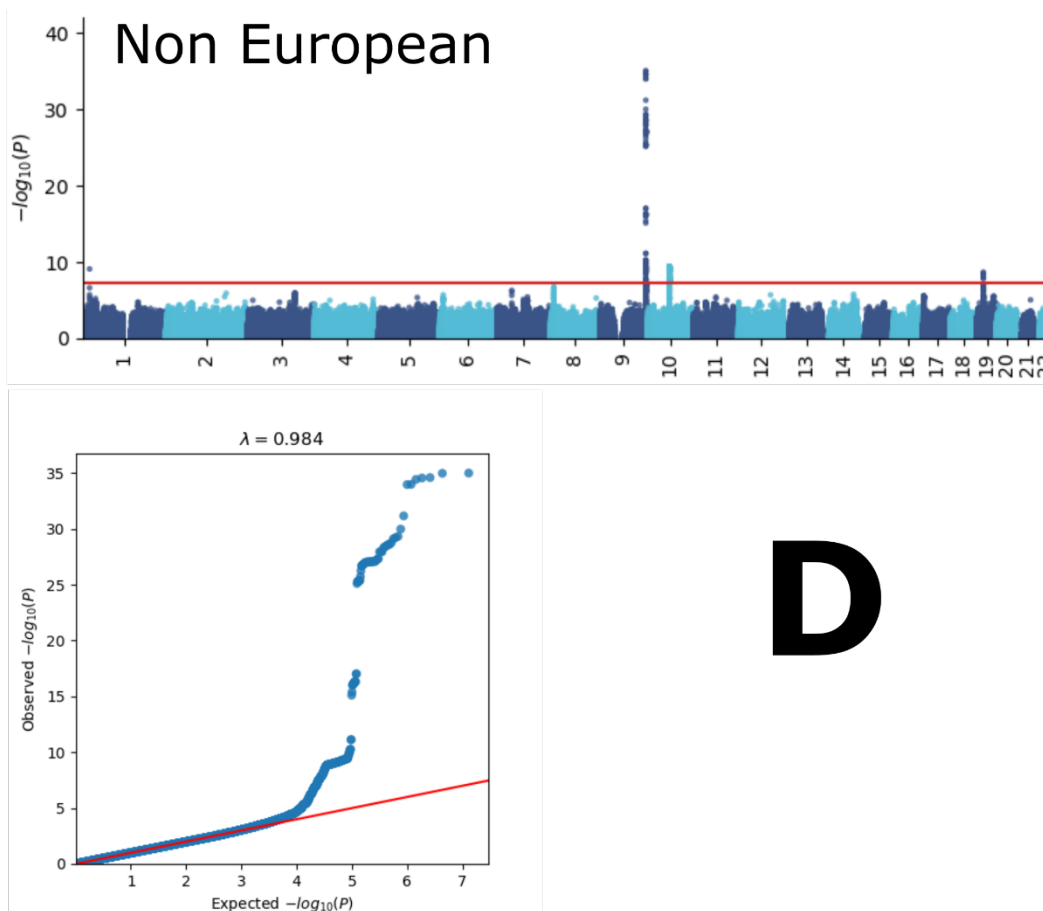

# D

318  
 319 Manhattan and QQ plots, along with genomic inflation factors and LDSC intercepts, are  
 320 displayed for the primary GWAS conducted on individuals of European ancestry ( $N=111,386$ )  
 321 using PLINK and fastGWA (**A**). Additionally, results are presented for split-sample GWAS  
 322 (split1 and split2, **B**), sex-stratified GWAS (female and male, **C**), and GWAS involving non-  
 323 European ancestry populations ( $N=20,408$ , **D**).

324 eFigure 5: GWAS Manhattan plots for the immune BAG

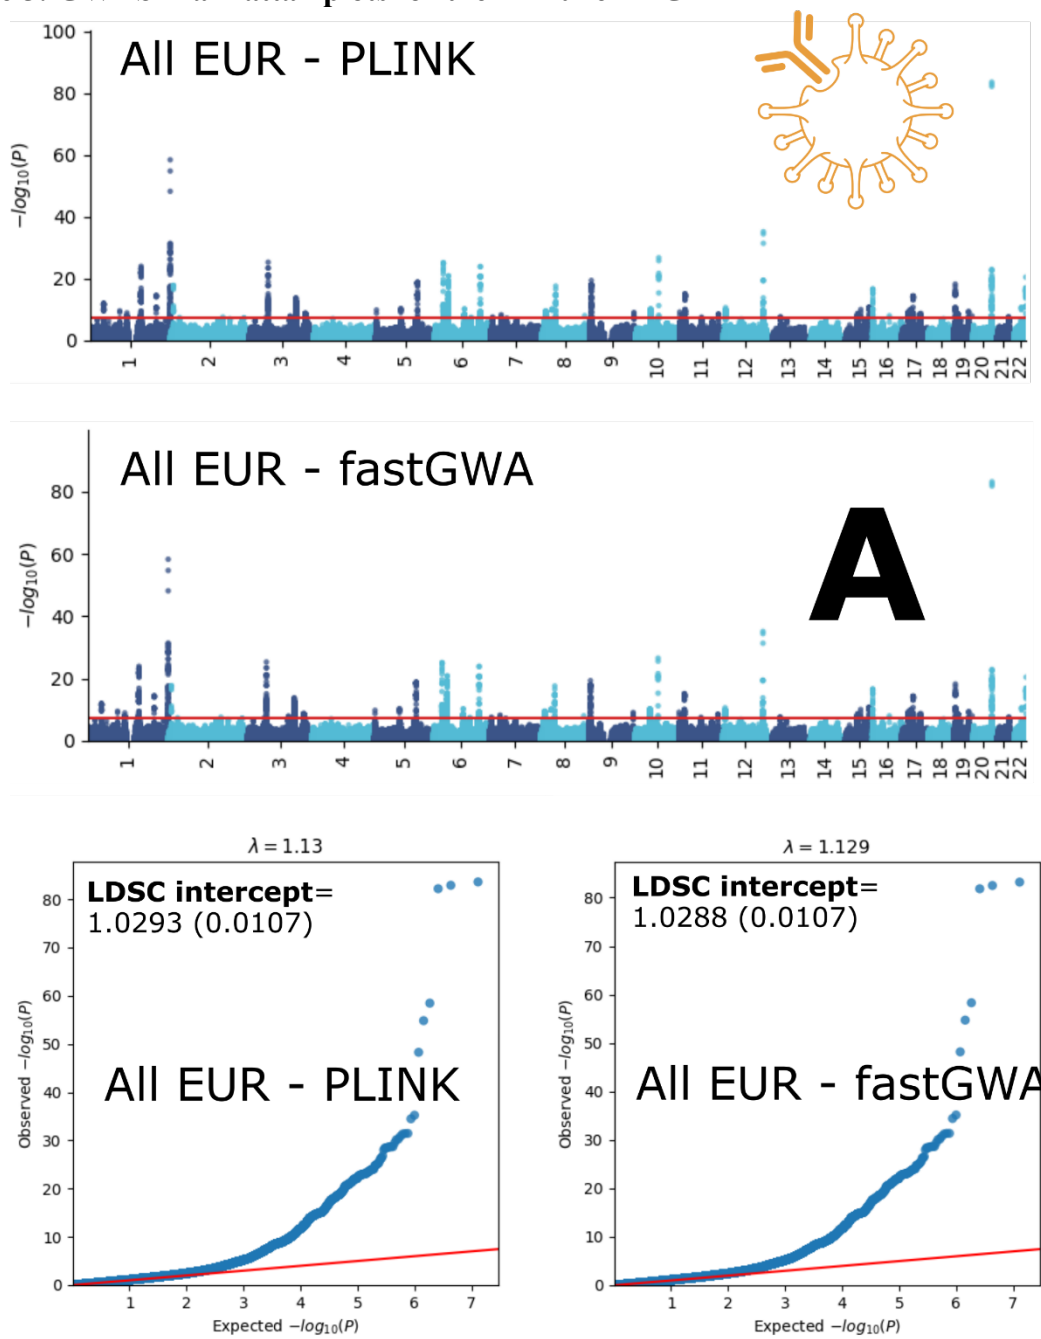

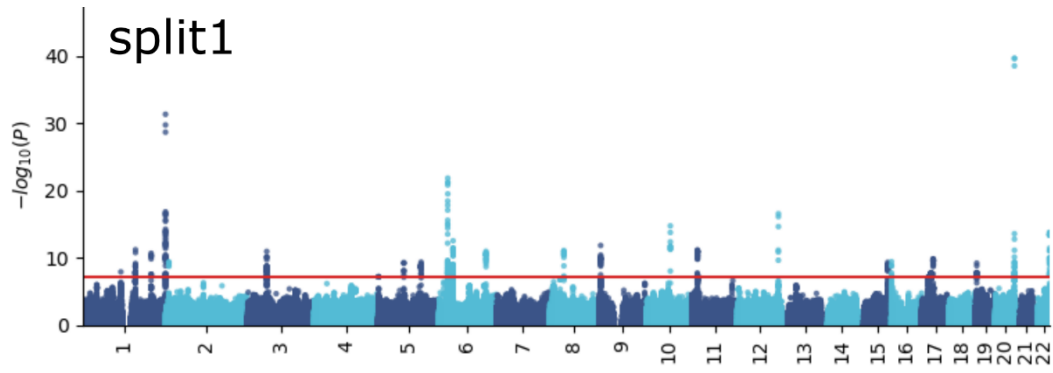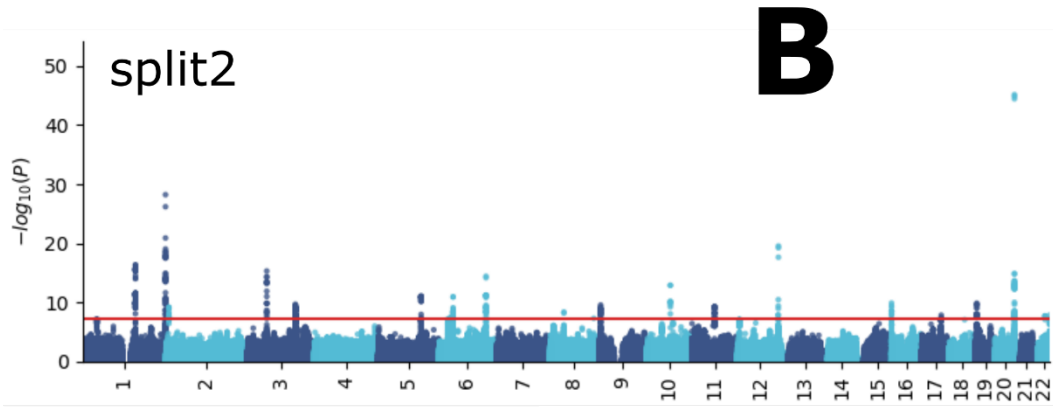**B**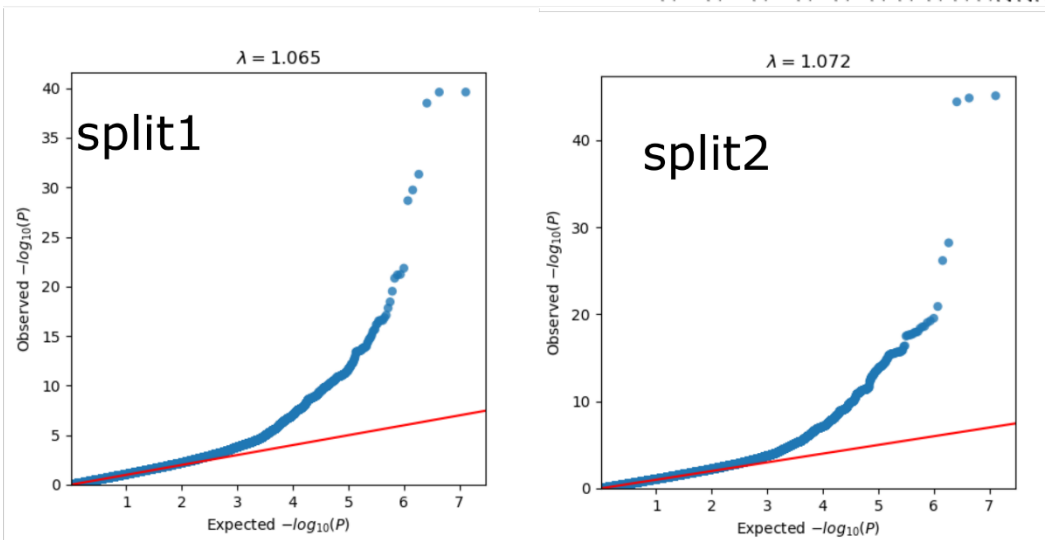



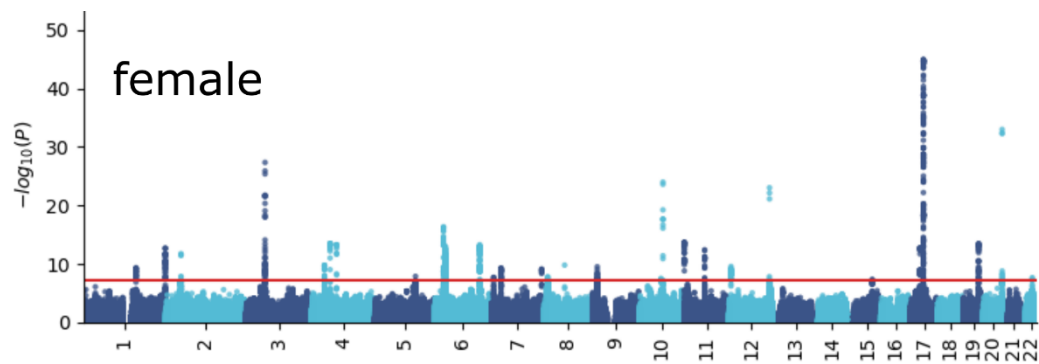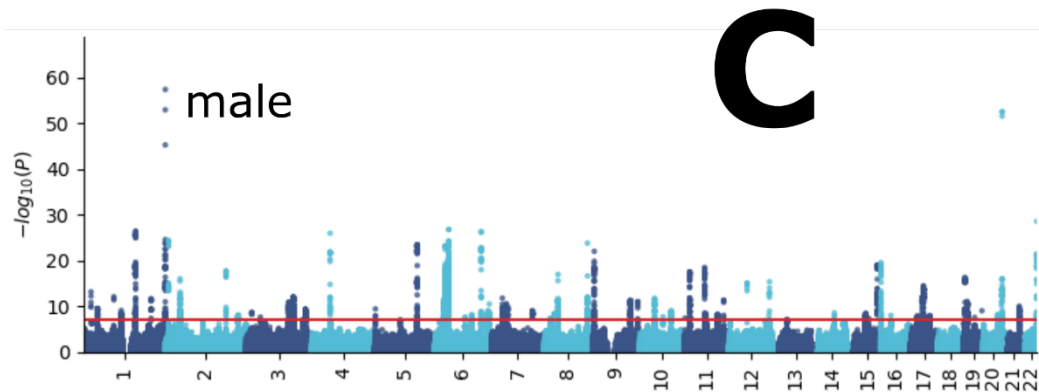

C

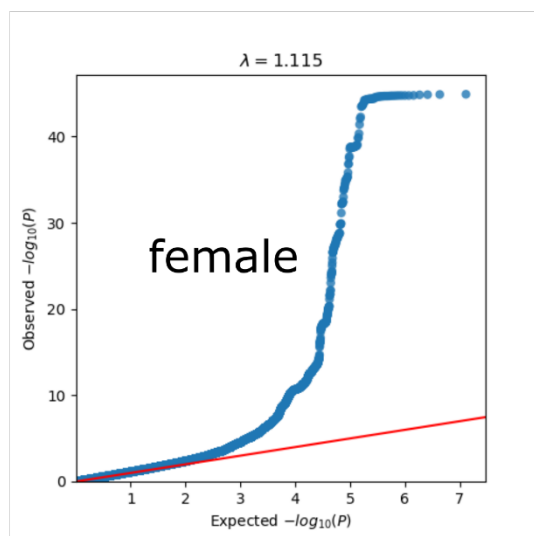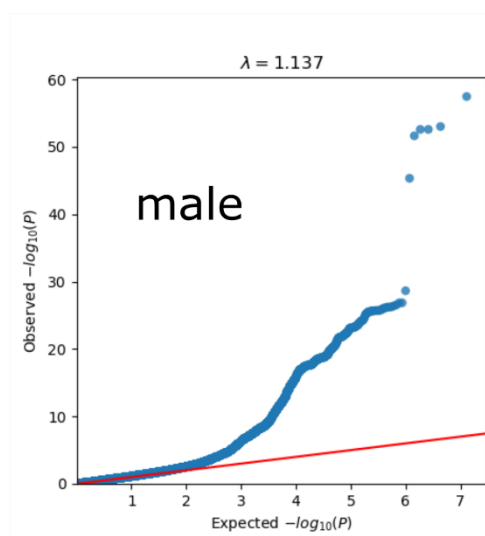

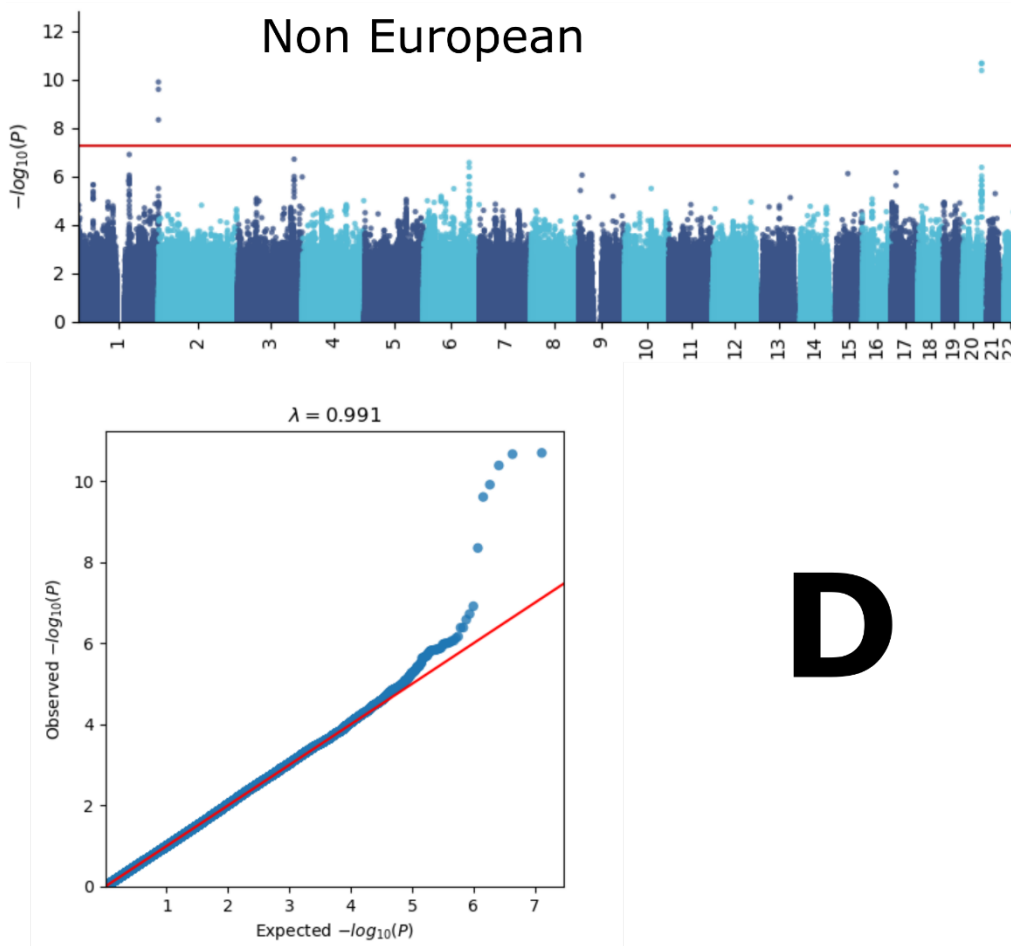

**D**

328  
 329 Manhattan and QQ plots, along with genomic inflation factors and LDSC intercepts, are  
 330 displayed for the primary GWAS conducted on individuals of European ancestry ( $N=111,386$ )  
 331 using PLINK and fastGWA (**A**). Additionally, results are presented for split-sample GWAS  
 332 (split1 and split2, **B**), sex-stratified GWAS (female and male, **C**), and GWAS involving non-  
 333 European ancestry populations ( $N=20,408$ , **D**).

334 **eFigure 6: GWAS Manhattan plots for the metabolic BAG**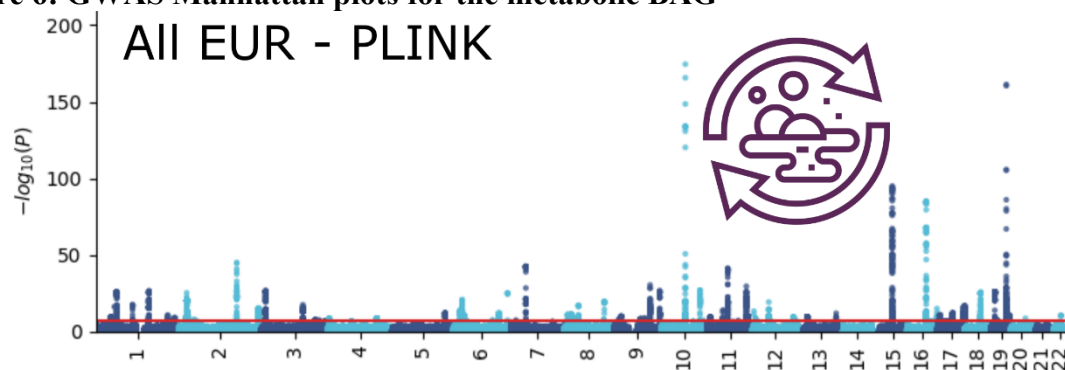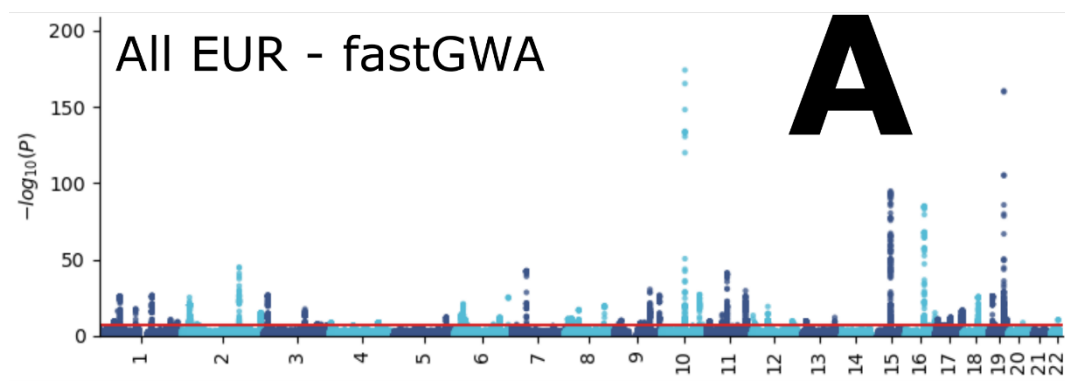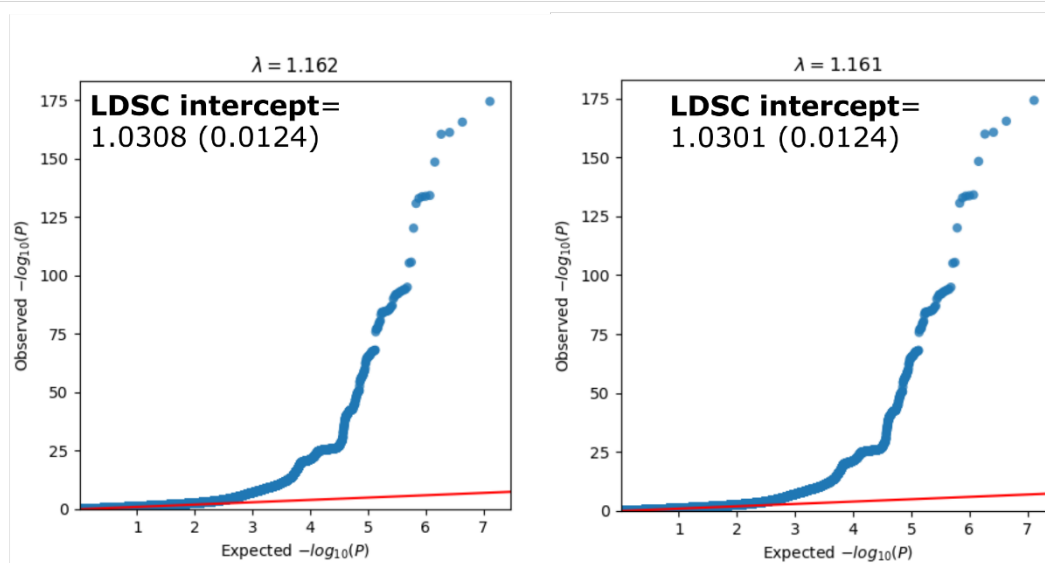

All EUR - PLINK

All EUR - fastGWA

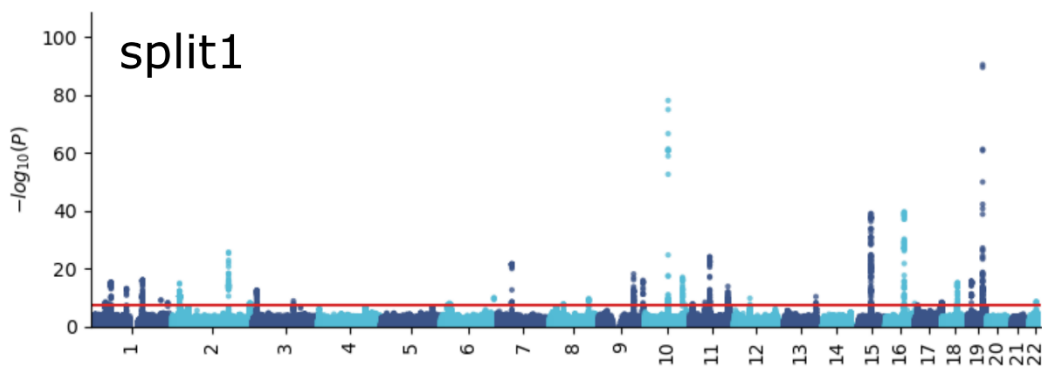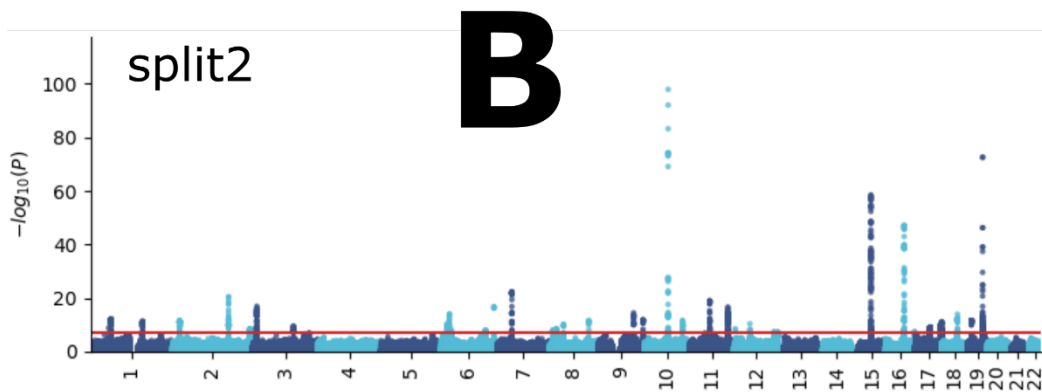

**B**

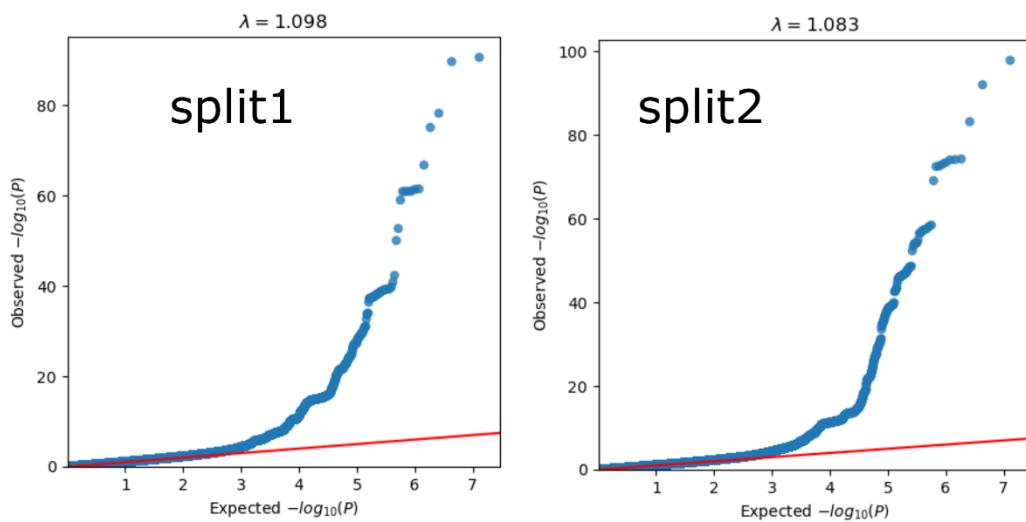

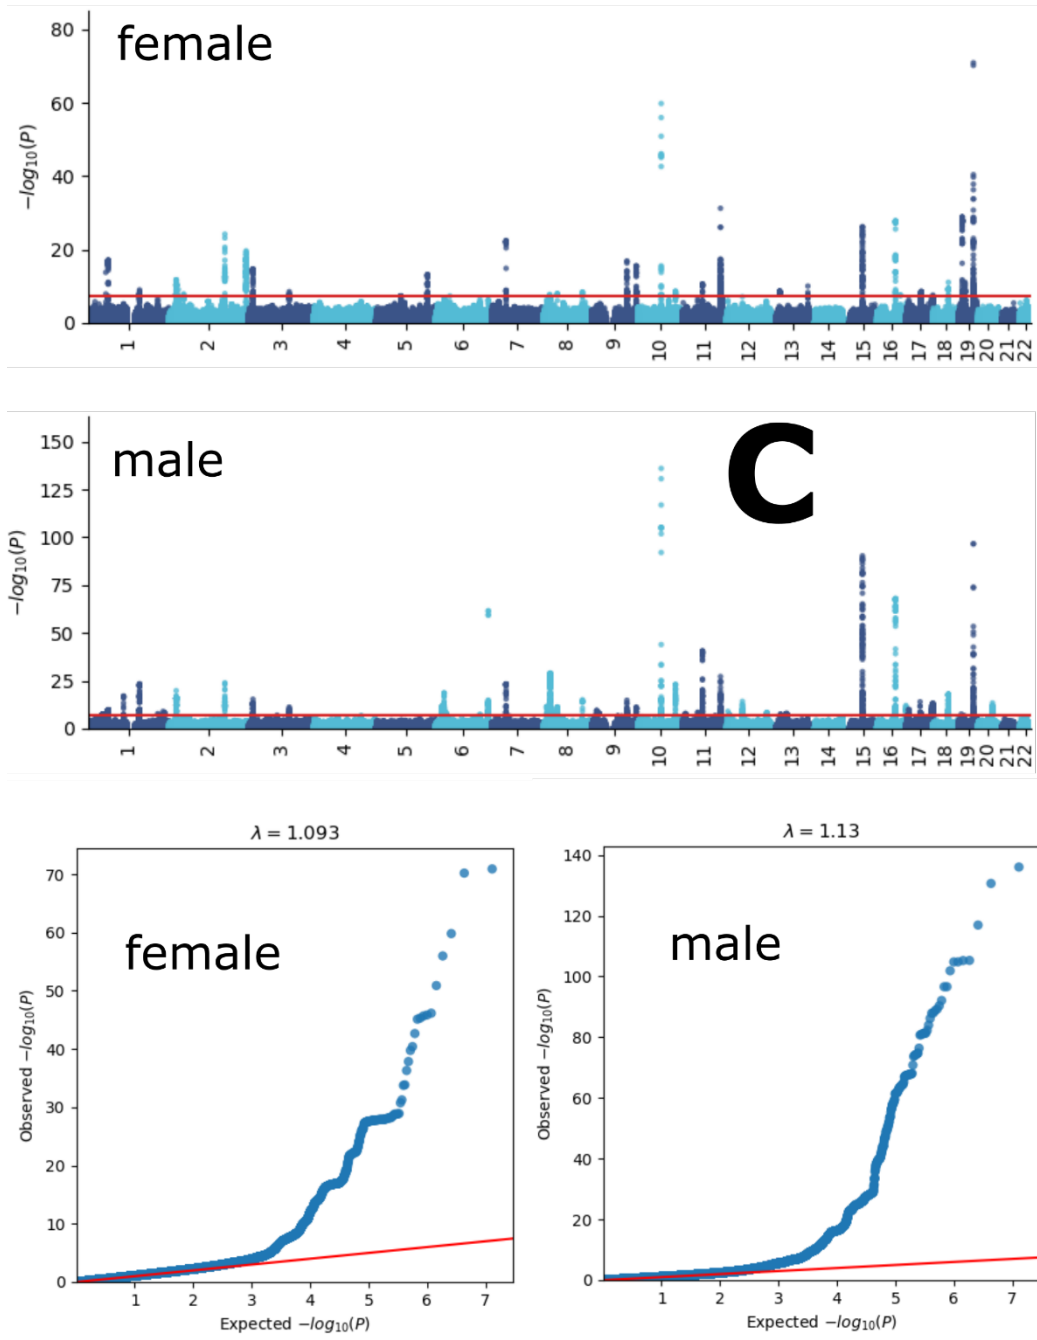

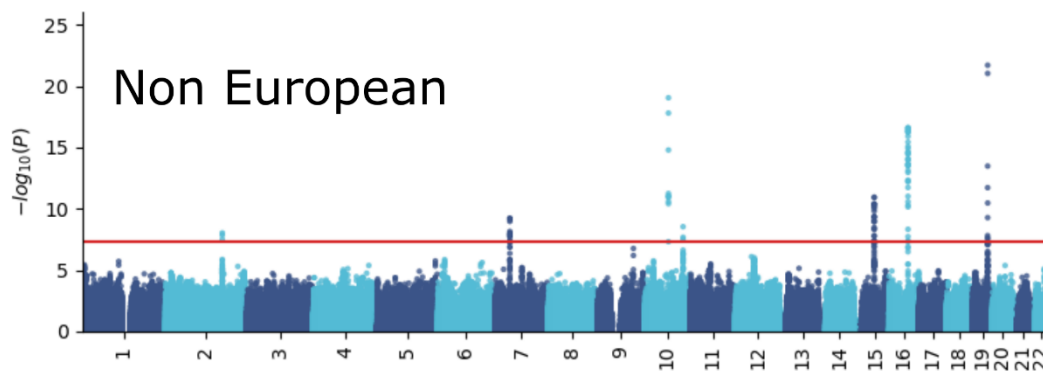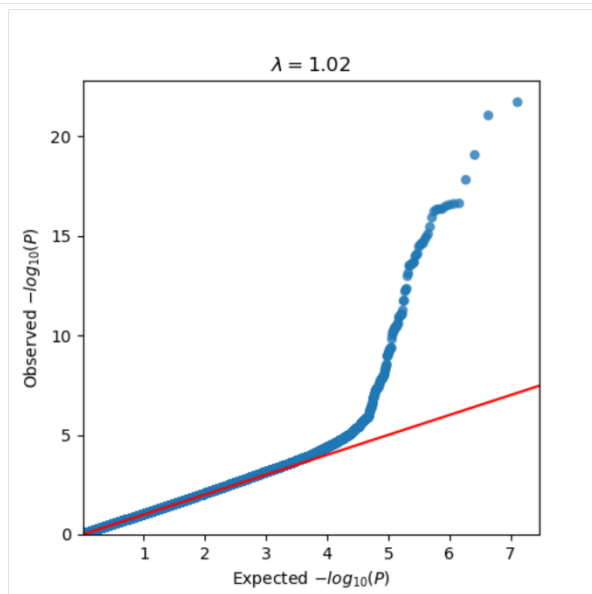

# D

338  
 339 Manhattan and QQ plots, along with genomic inflation factors and LDSC intercepts, are  
 340 displayed for the primary GWAS conducted on individuals of European ancestry ( $N=111,386$ )  
 341 using PLINK and fastGWA (**A**). Additionally, results are presented for split-sample GWAS  
 342 (split1 and split2, **B**), sex-stratified GWAS (female and male, **C**), and GWAS involving non-  
 343 European ancestry populations ( $N=20,408$ , **D**).

344 eFigure 7: GWAS Manhattan plots for the musculoskeletal BAG

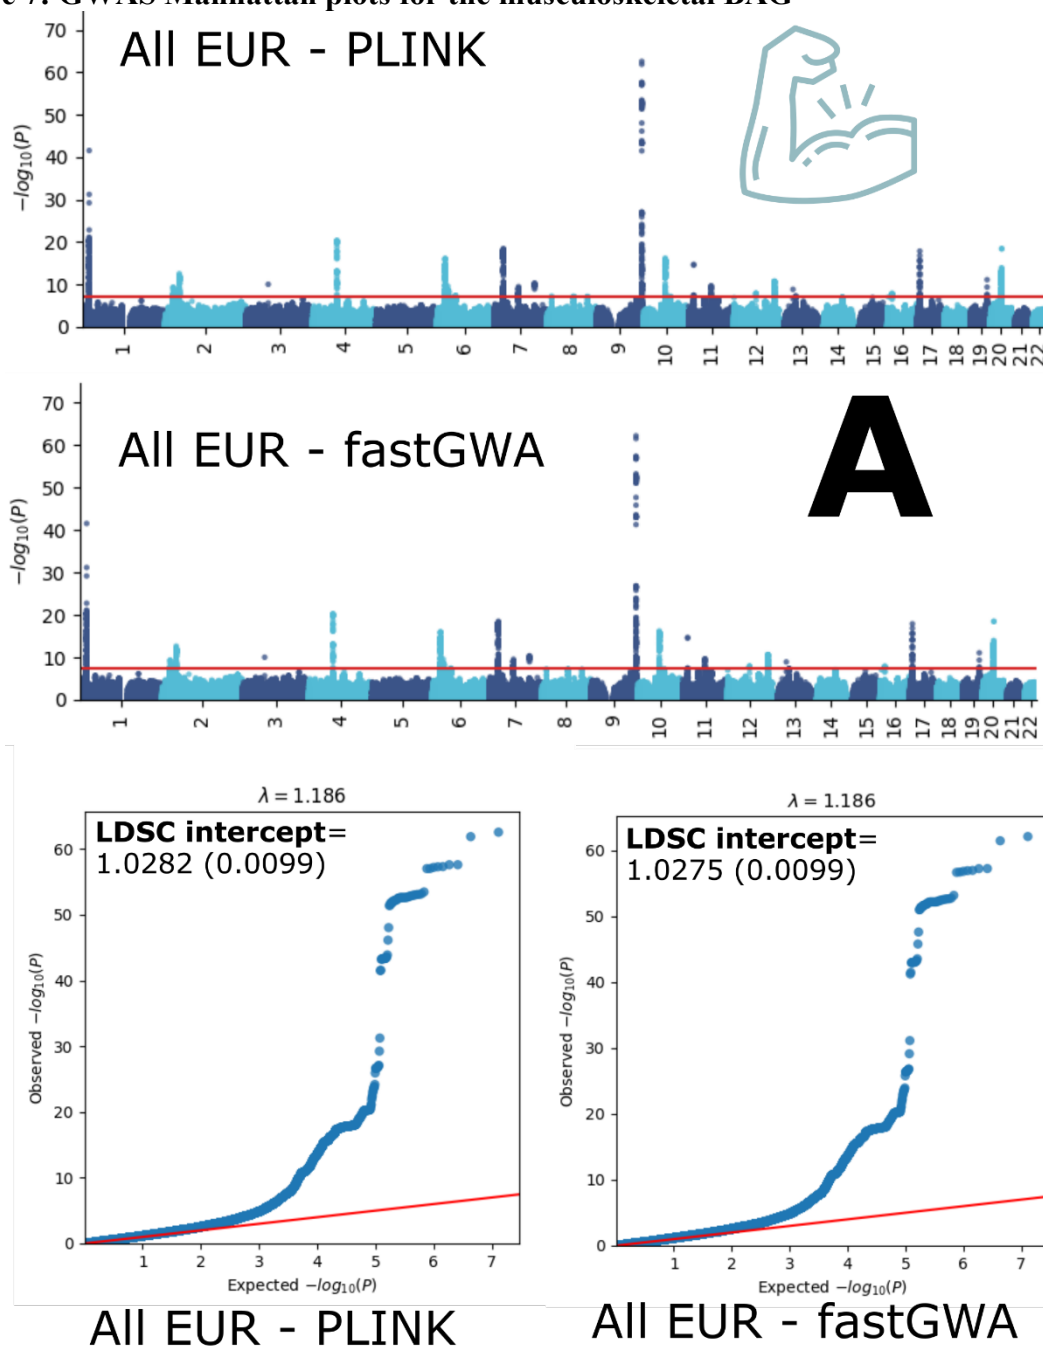

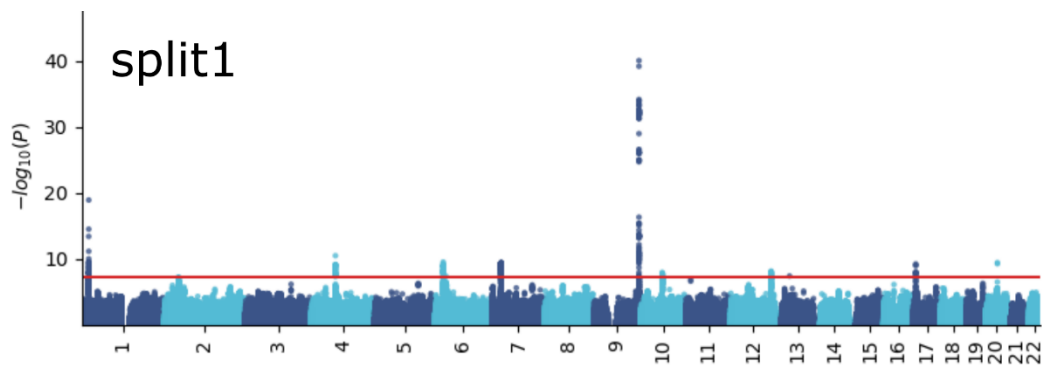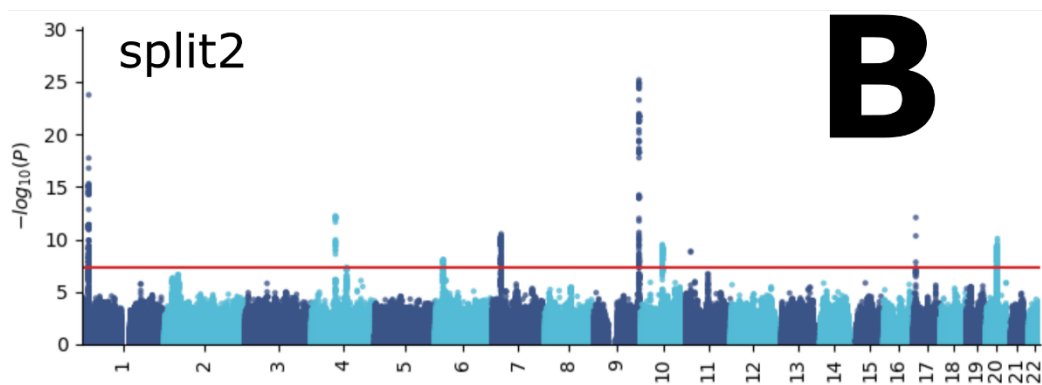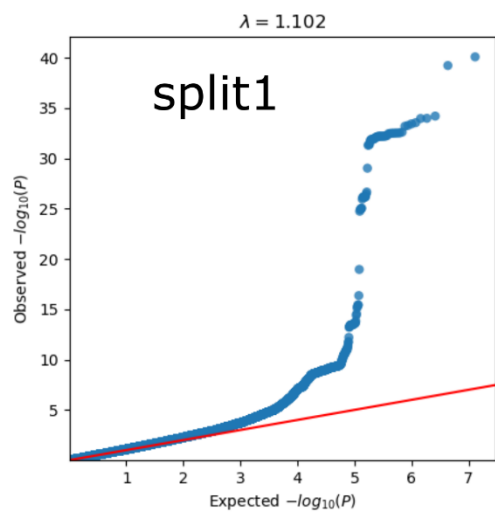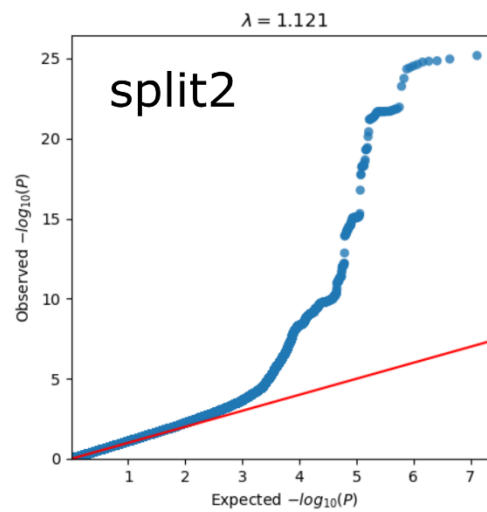



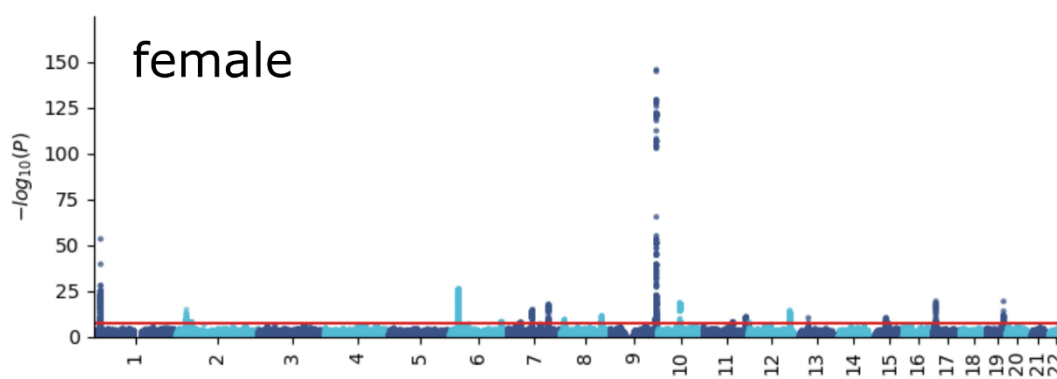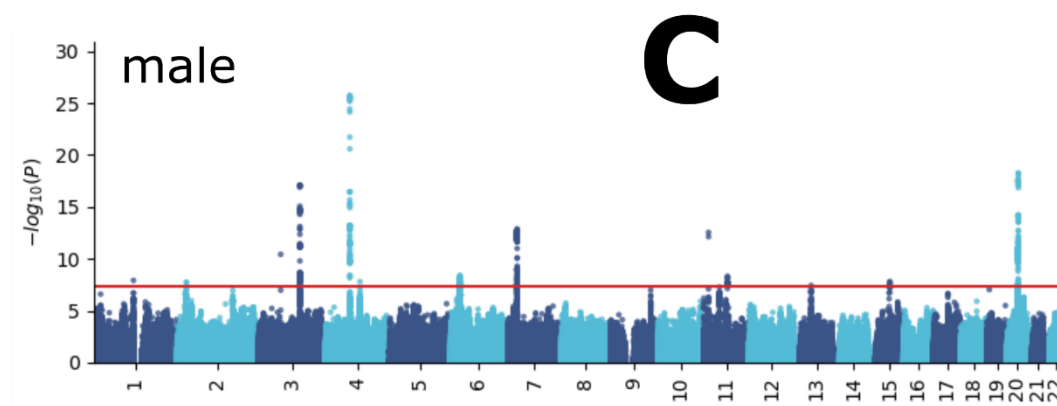

C

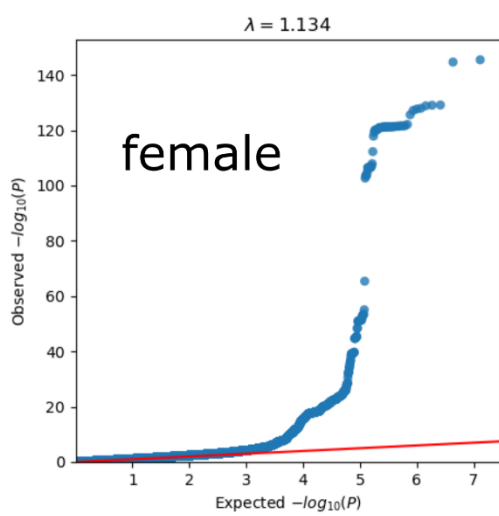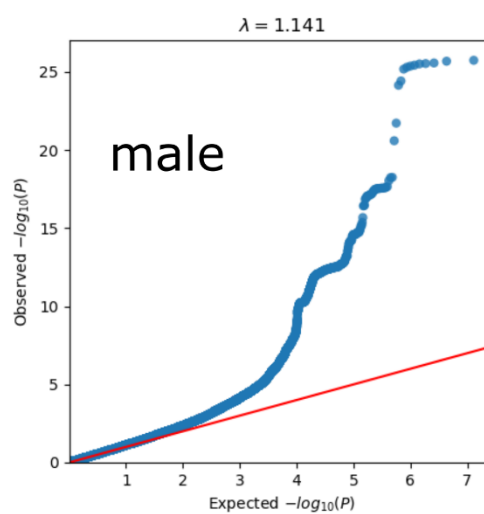

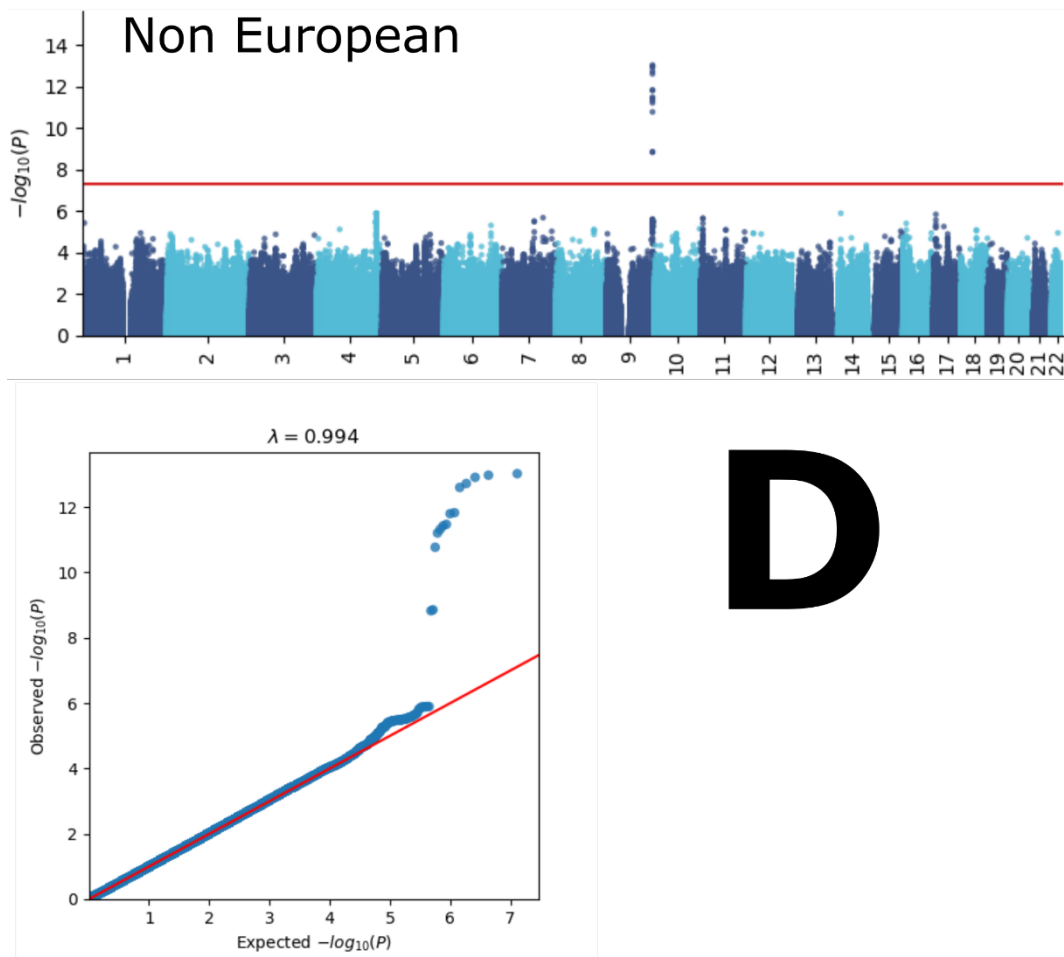

# D

348  
 349 Manhattan and QQ plots, along with genomic inflation factors and LDSC intercepts, are  
 350 displayed for the primary GWAS conducted on individuals of European ancestry ( $N=111,386$ )  
 351 using PLINK and fastGWA (A). Additionally, results are presented for split-sample GWAS  
 352 (split1 and split2, B), sex-stratified GWAS (female and male, C), and GWAS involving non-  
 353 European ancestry populations ( $N=20,408$ , D).

354 eFigure 8: GWAS Manhattan plots for the pulmonary BAG

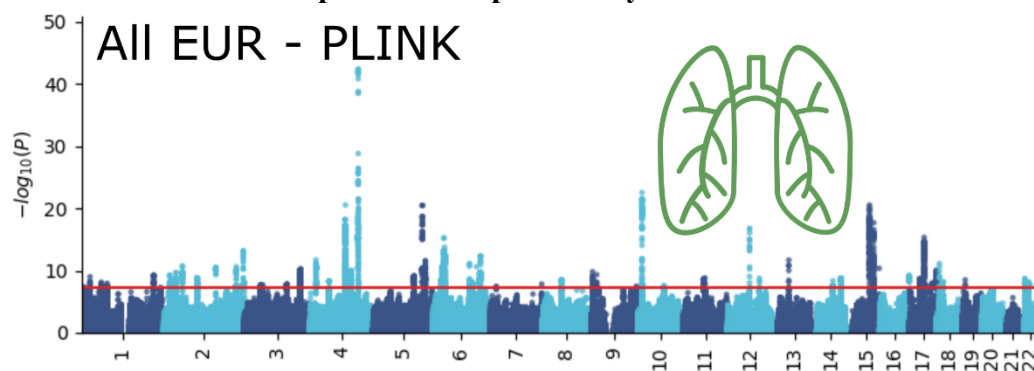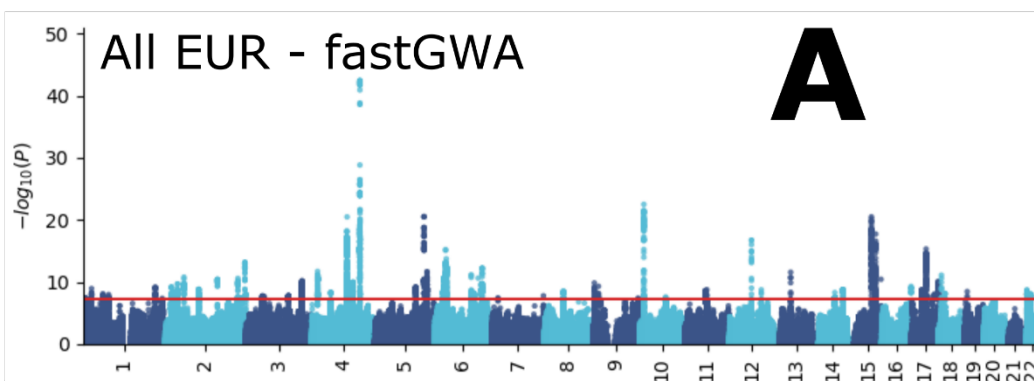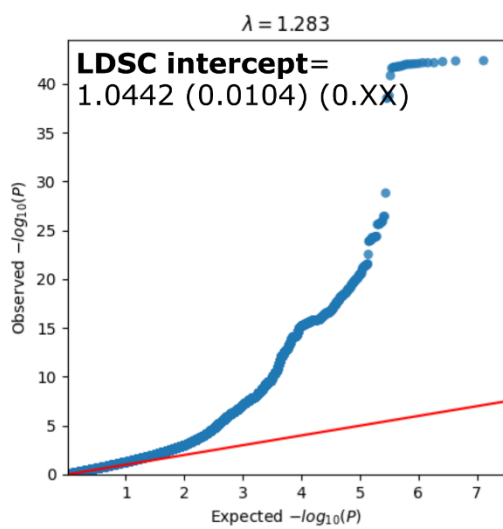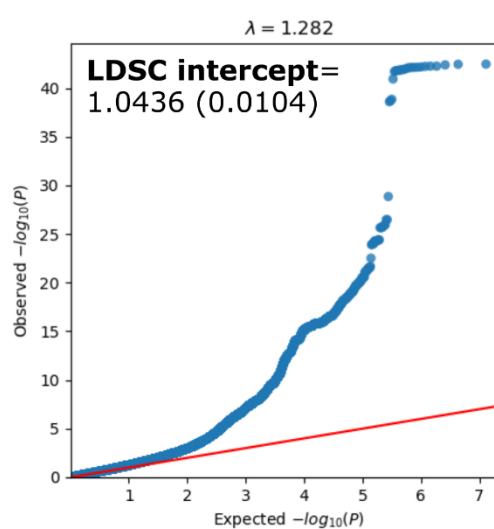

All EUR - PLINK

All EUR - fastGWA

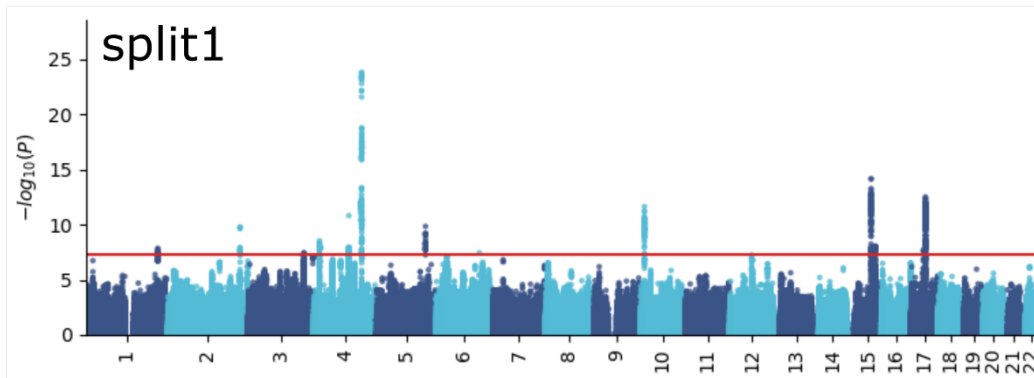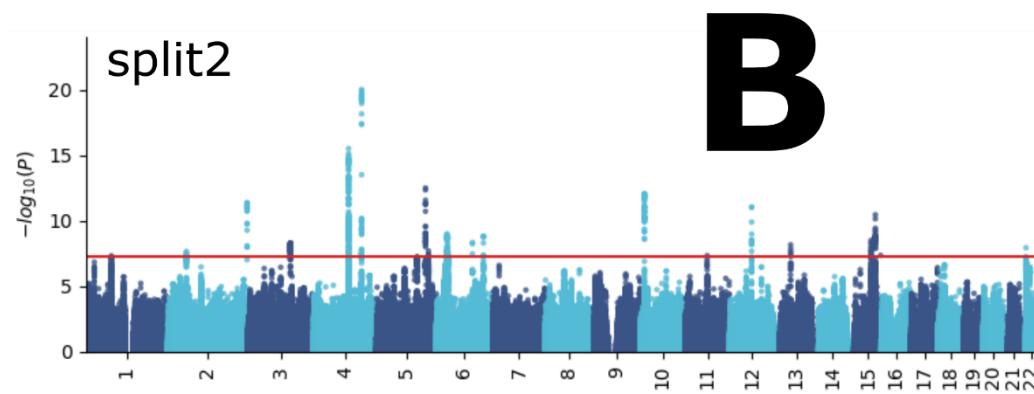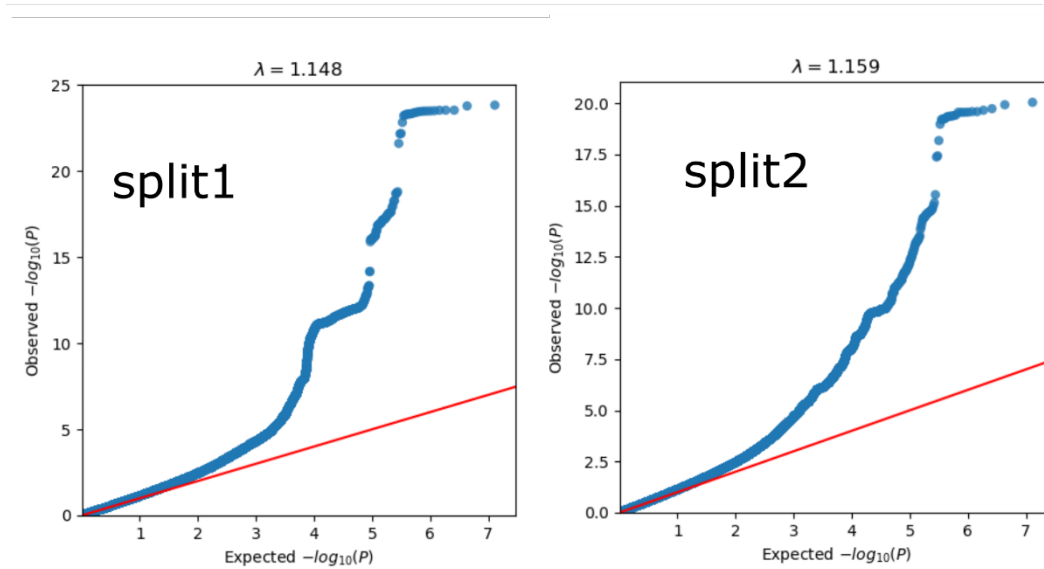

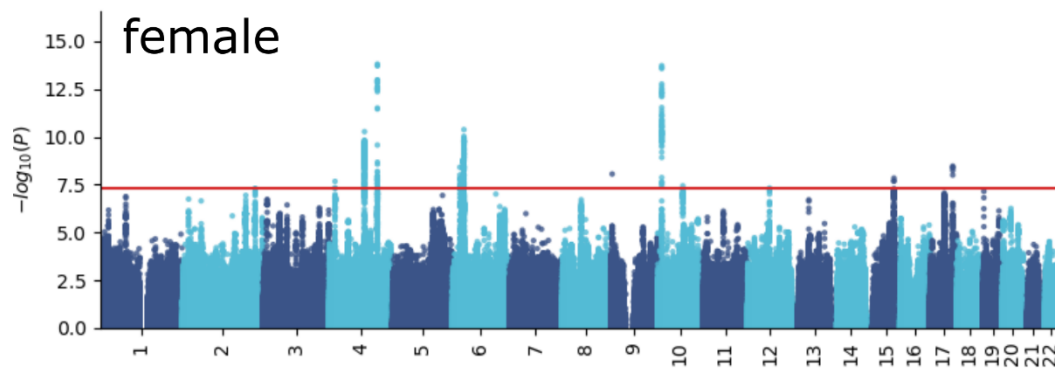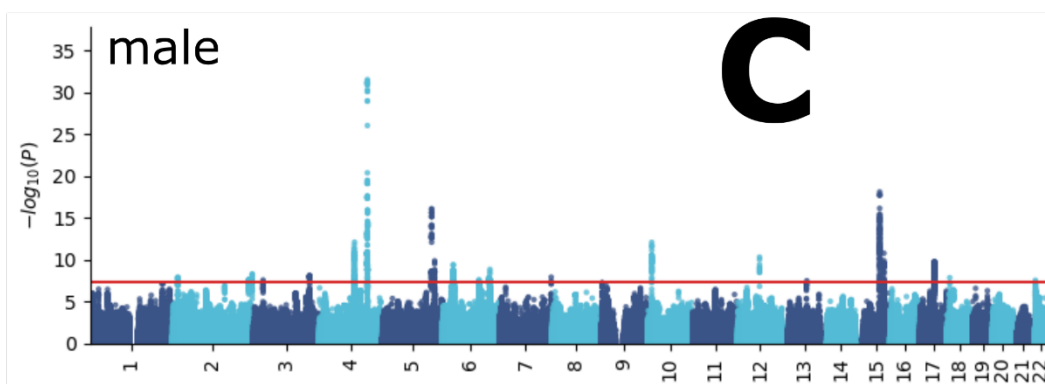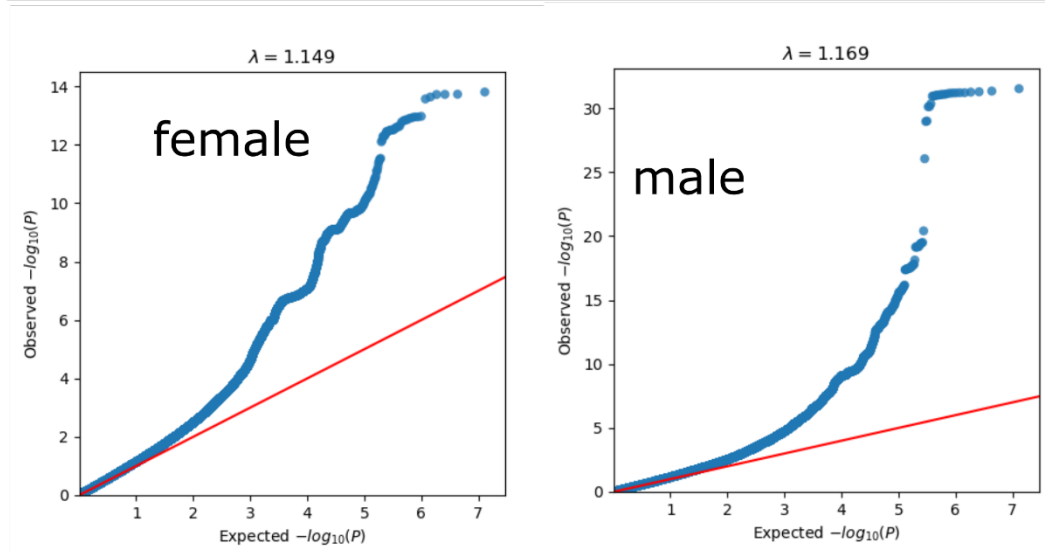

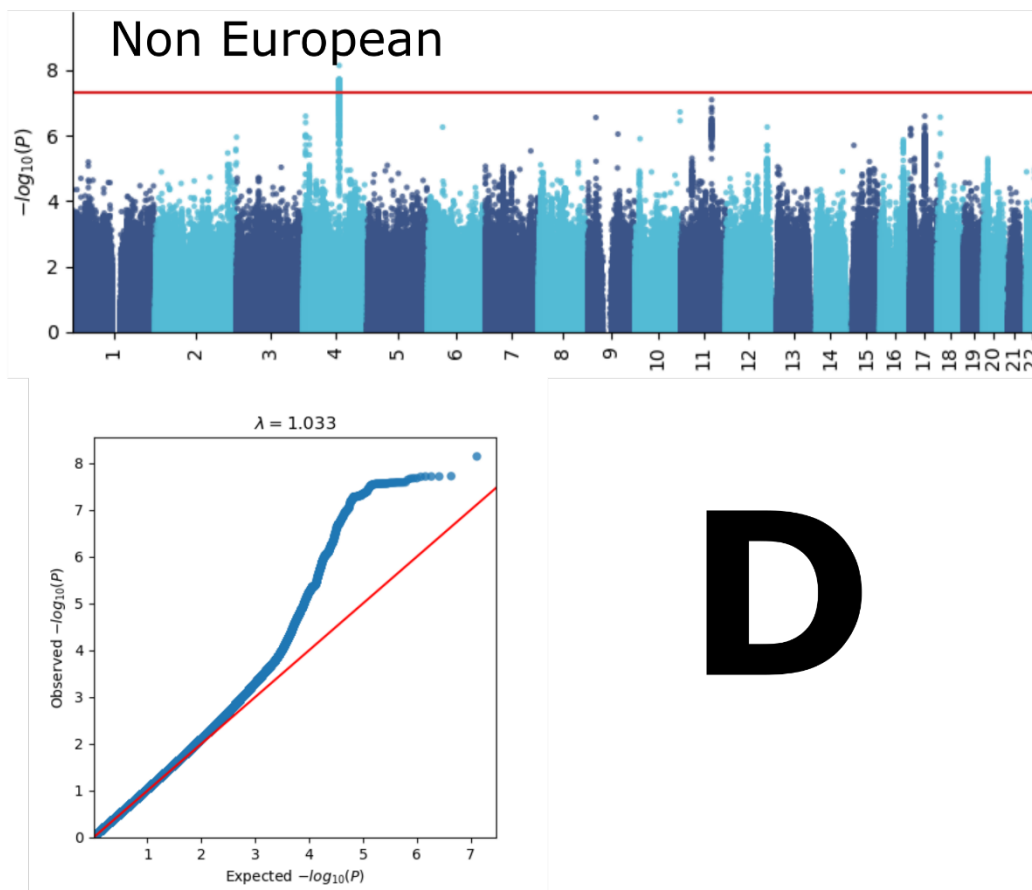

**D**

358  
 359  
 360  
 361  
 362  
 363

Manhattan and QQ plots, along with genomic inflation factors and LDSC intercepts, are displayed for the primary GWAS conducted on individuals of European ancestry ( $N=111,386$ ) using PLINK and fastGWA (**A**). Additionally, results are presented for split-sample GWAS (split1 and split2, **B**), sex-stratified GWAS (female and male, **C**), and GWAS involving non-European ancestry populations ( $N=20,408$ , **D**).

364 eFigure 9: GWAS Manhattan plots for the renal BAG

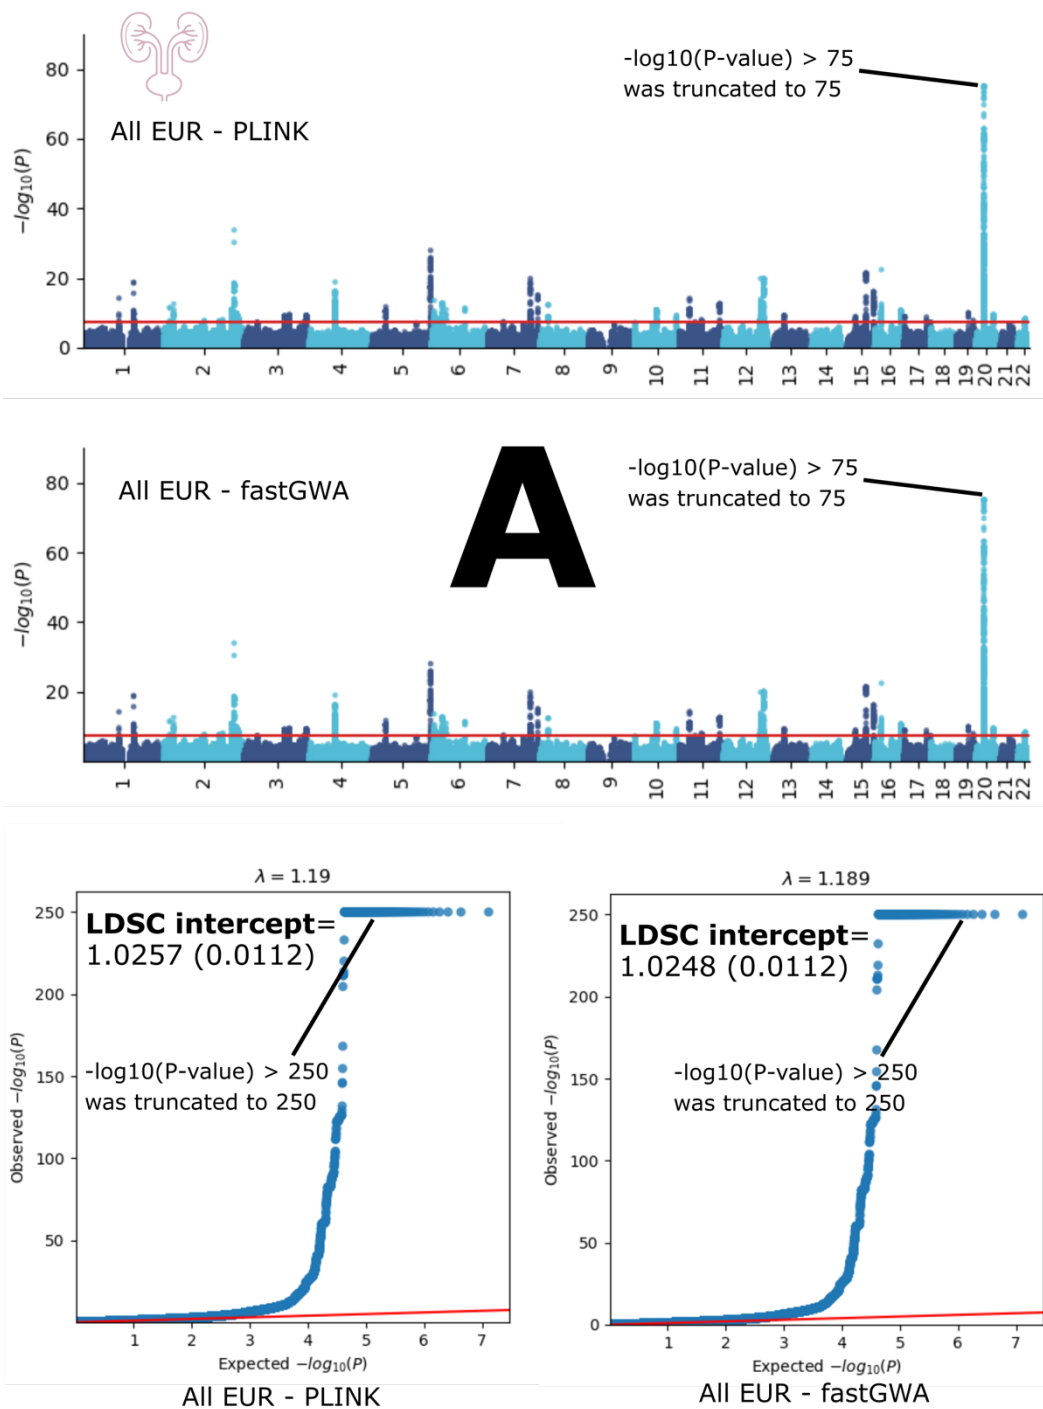

365

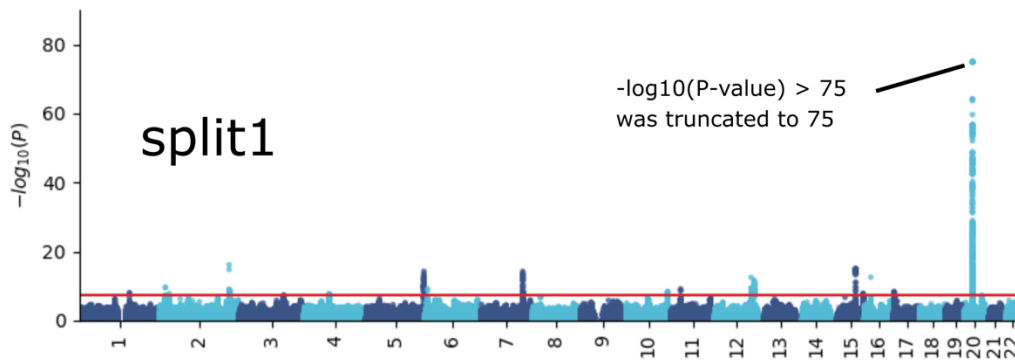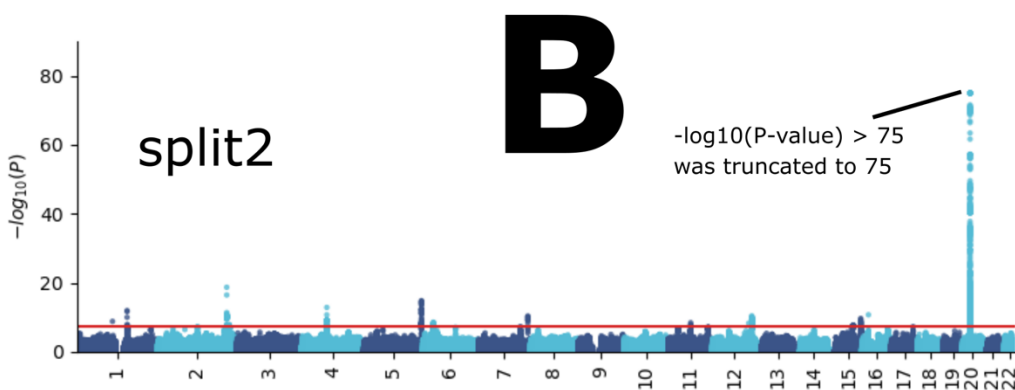**B**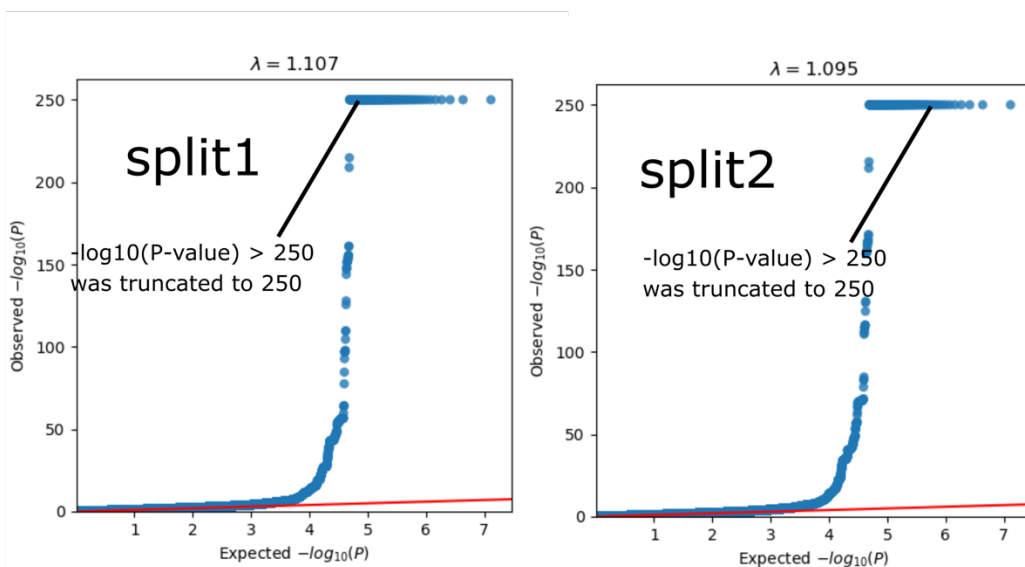



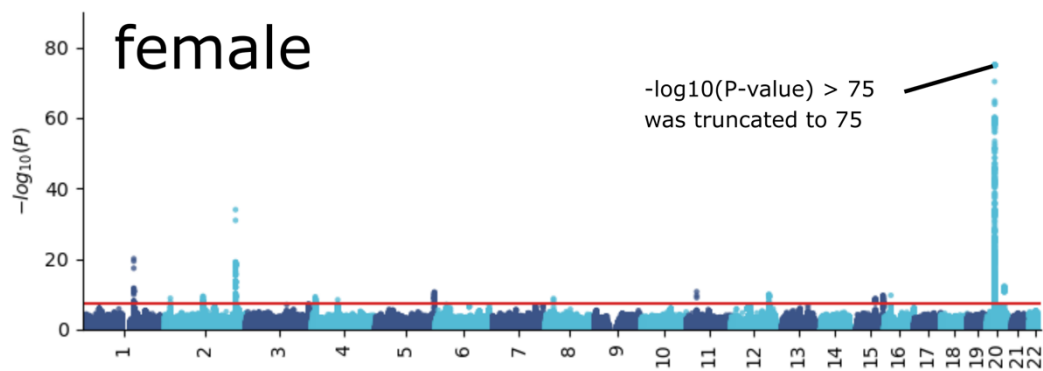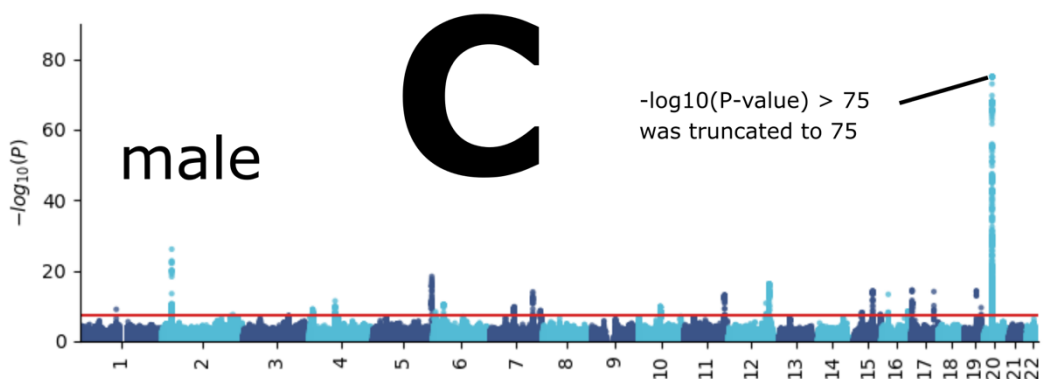

**C**

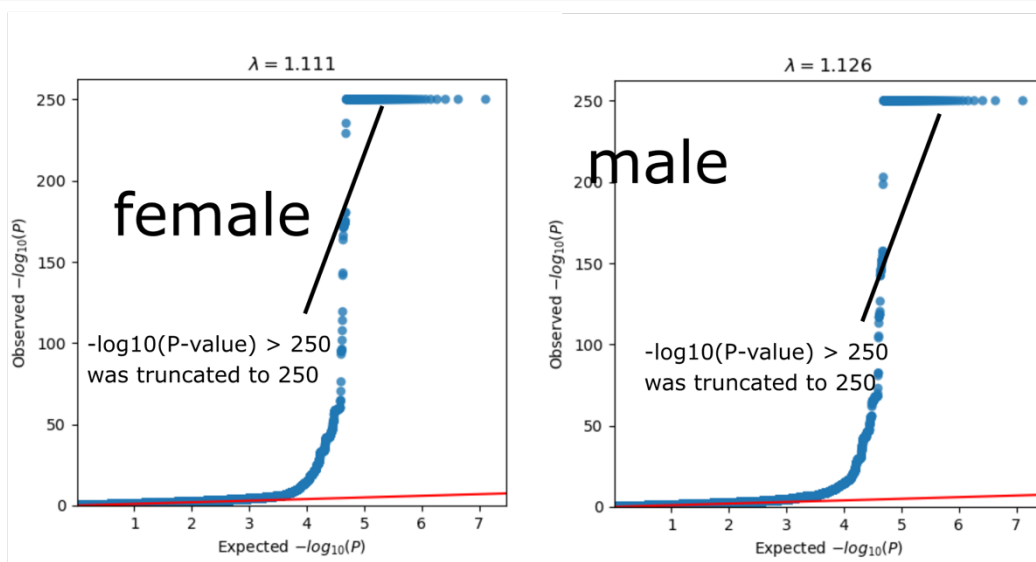

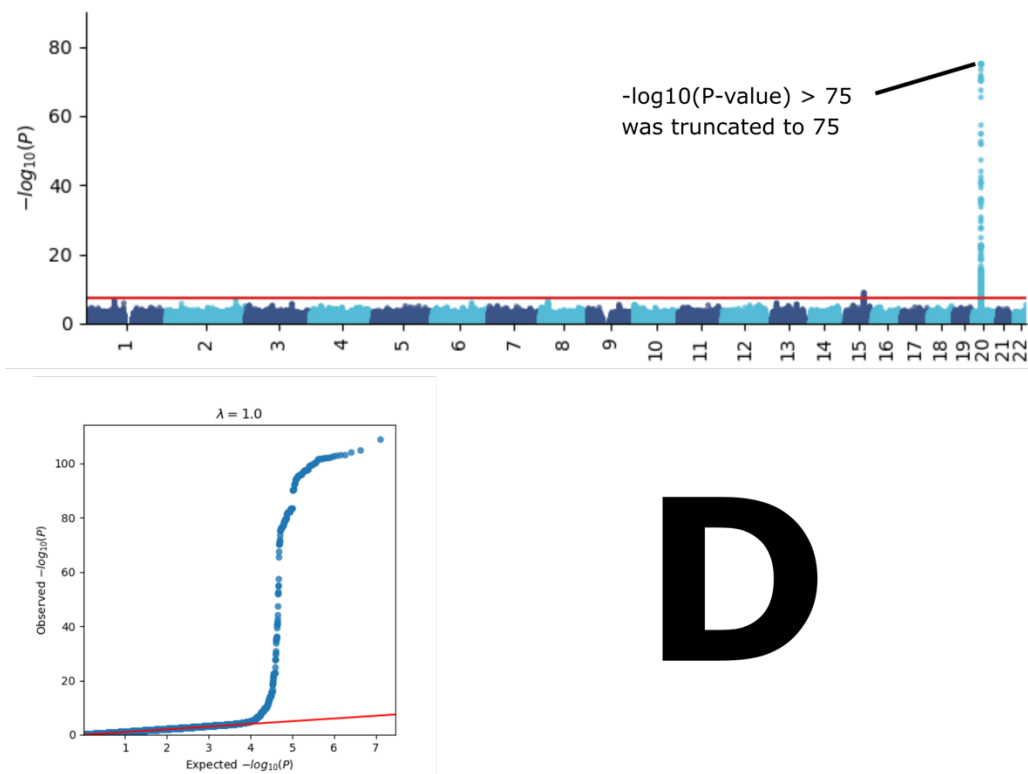

# D

368  
 369  
 370  
 371  
 372  
 373  
 374  
 375

Manhattan and QQ plots, along with genomic inflation factors and LDSC intercepts, are displayed for the primary GWAS conducted on individuals of European ancestry ( $N=111,386$ ) using PLINK and fastGWA (**A**). Additionally, results are presented for split-sample GWAS (split1 and split2, **B**), sex-stratified GWAS (female and male, **C**), and GWAS involving non-European ancestry populations ( $N=20,408$ , **D**). For visualization purposes, we chose to truncate the highly significant P-value ( $P\text{-value} < 1 \times 10^{-300}$ ) to a lower P-value ( $1 \times 10^{-75}$  for Manhattan plots and  $1 \times 10^{-250}$  for QQ plots).

376 **eFigure 10: Bayesian colocalization analysis for the locus on chromosome 6 between the**  
 377 **hepatic and musculoskeletal BAGs**

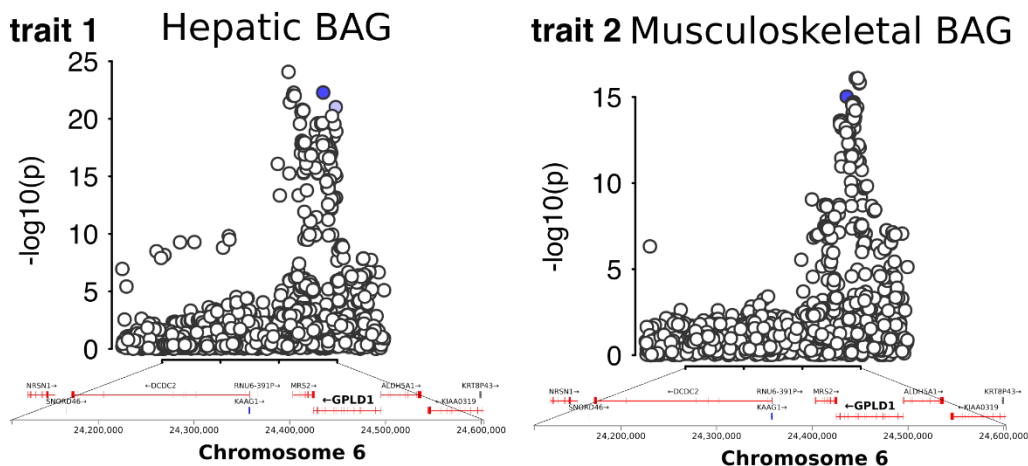

378 We conducted a Bayesian colocalization analysis using Bayes factors to investigate shared causal  
 379 variants in a specific locus on chromosome 6 for the hepatic and musculoskeletal BAGs. The  
 380 analysis tested five hypotheses, denoted by their posterior probabilities: H0 (no association with  
 381 either trait), H1 (association with trait 1 but not trait 2), H2 (association with trait 2 but not trait  
 382 1), H3 (association with both traits but with separate causal variants), and H4 (association with  
 383 both traits with a shared causal variant). The potential causal variants for both traits are indicated  
 384 by blue-colored SNPs, assuming each locus contains at most one causal variant. The gene  
 385 mapped to this locus (*GPLD1*) is shown in bold based on physical positions.  
 386  
 387

388 eFigure 11: Exemplary genomic locus for each BAG in the nine human organ systems

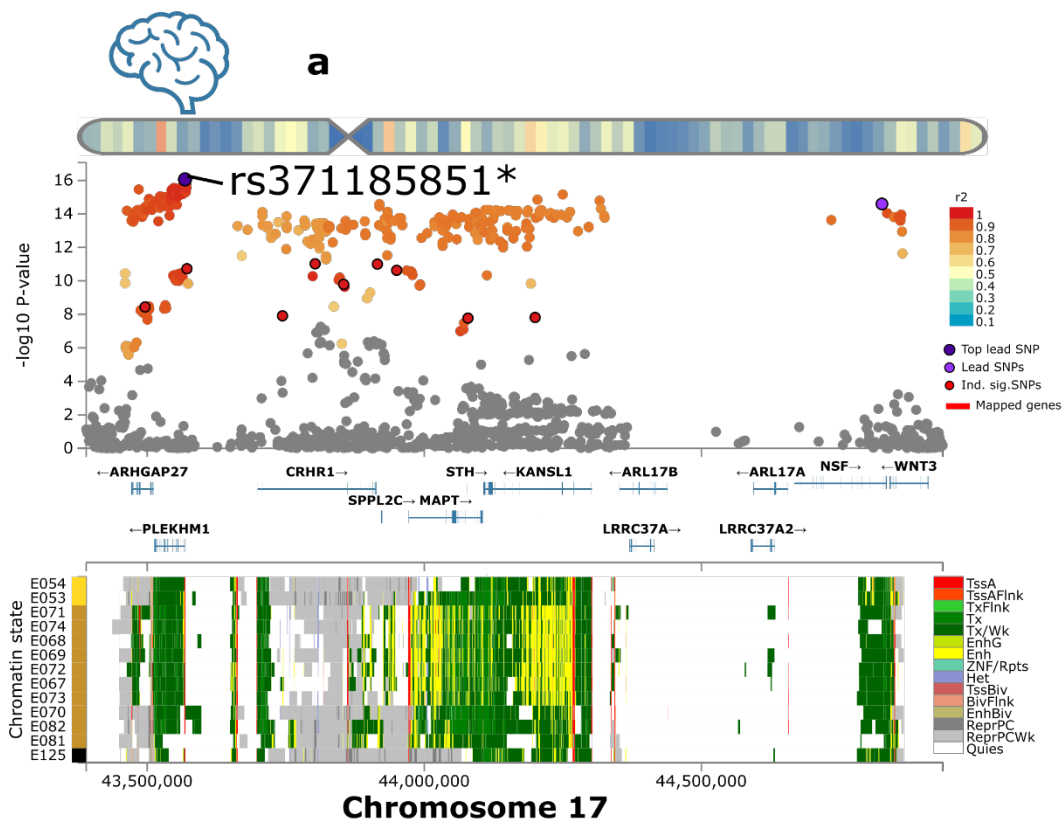

389

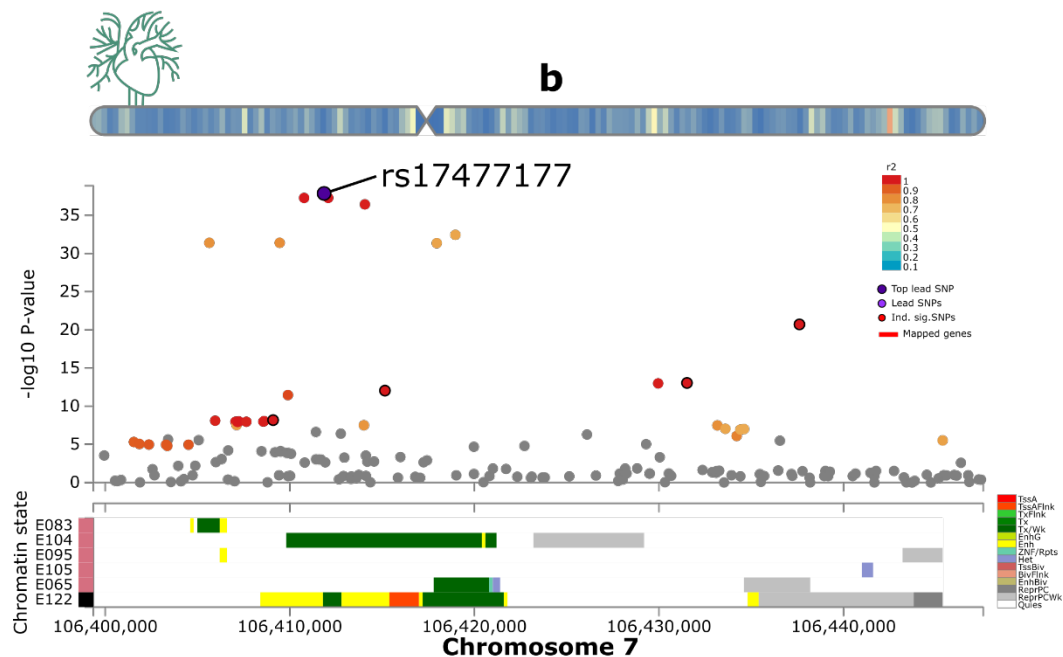

390

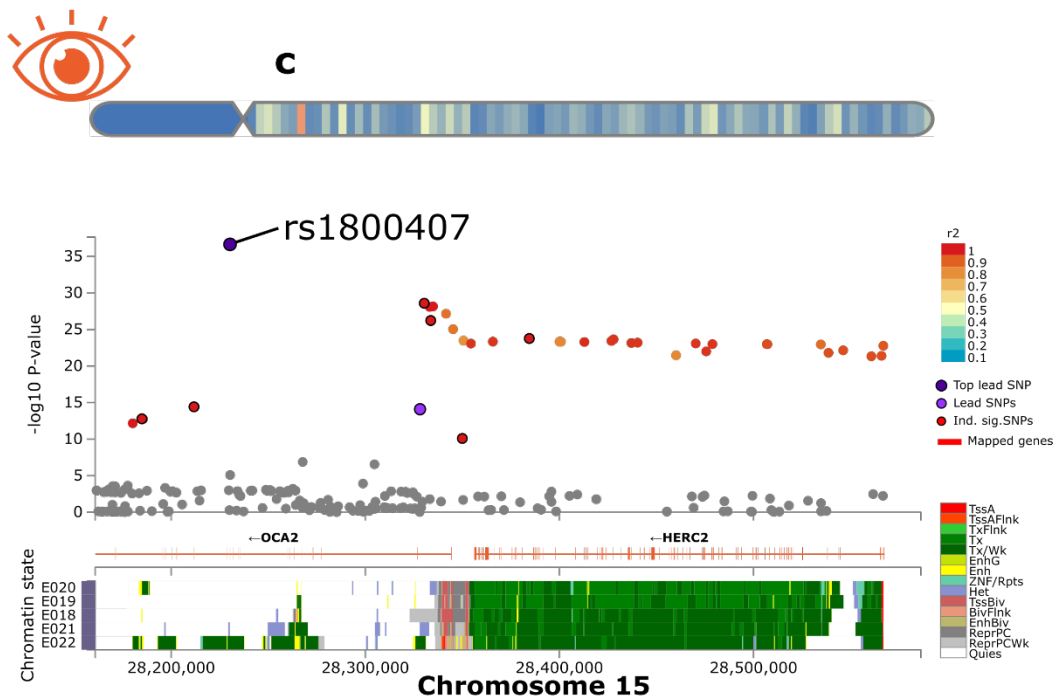

391

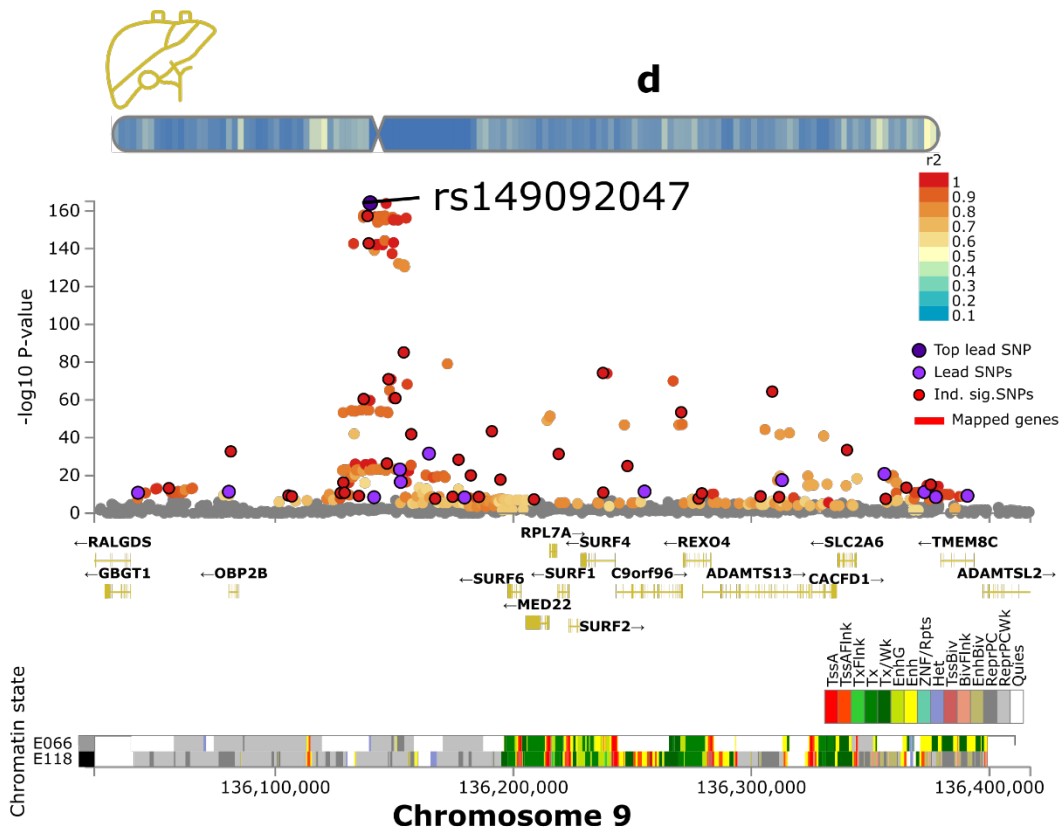

392

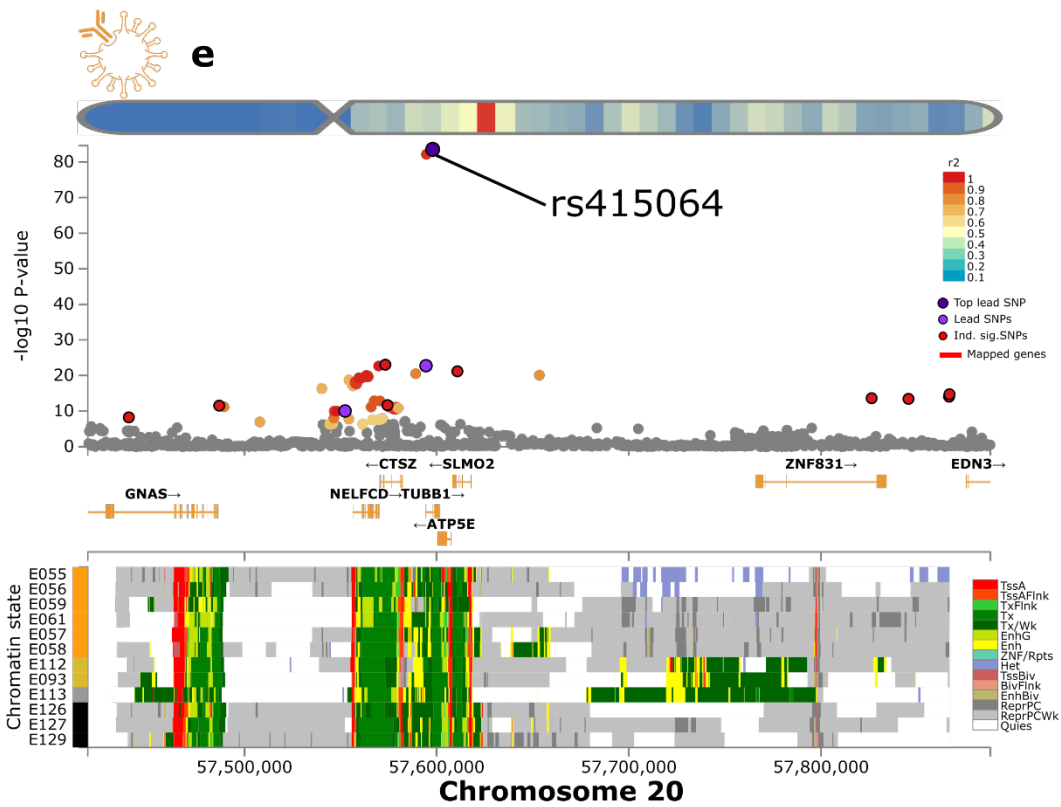

393

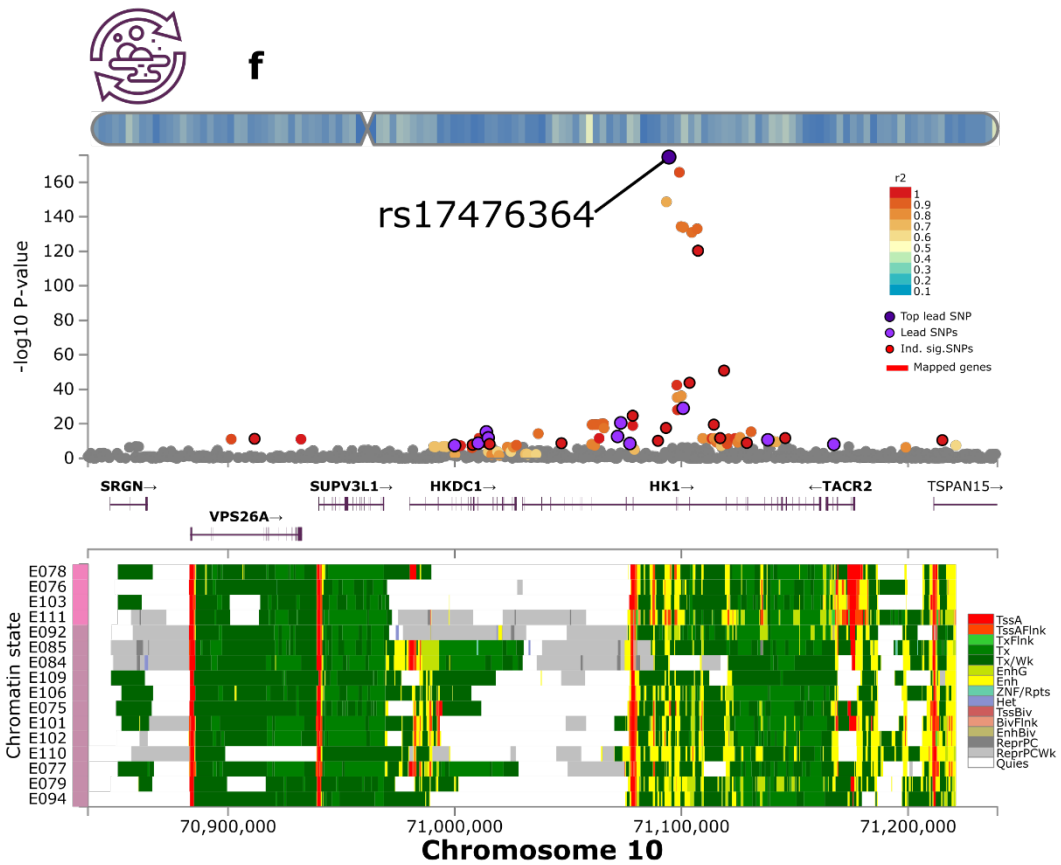

394

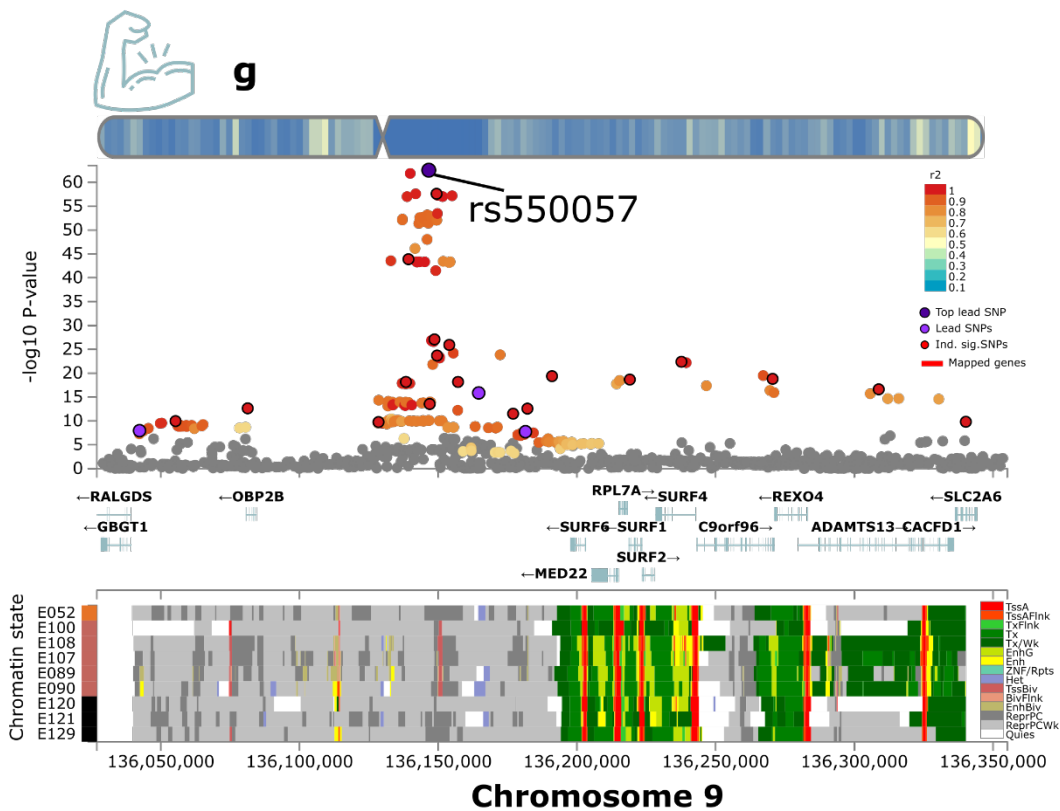

395

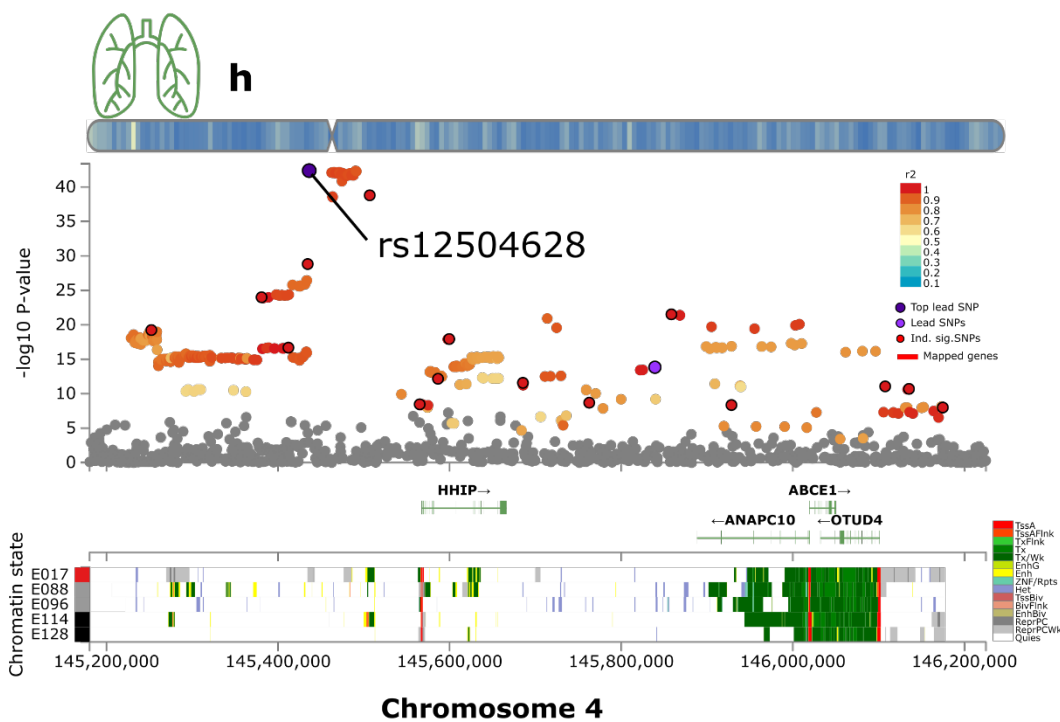

396

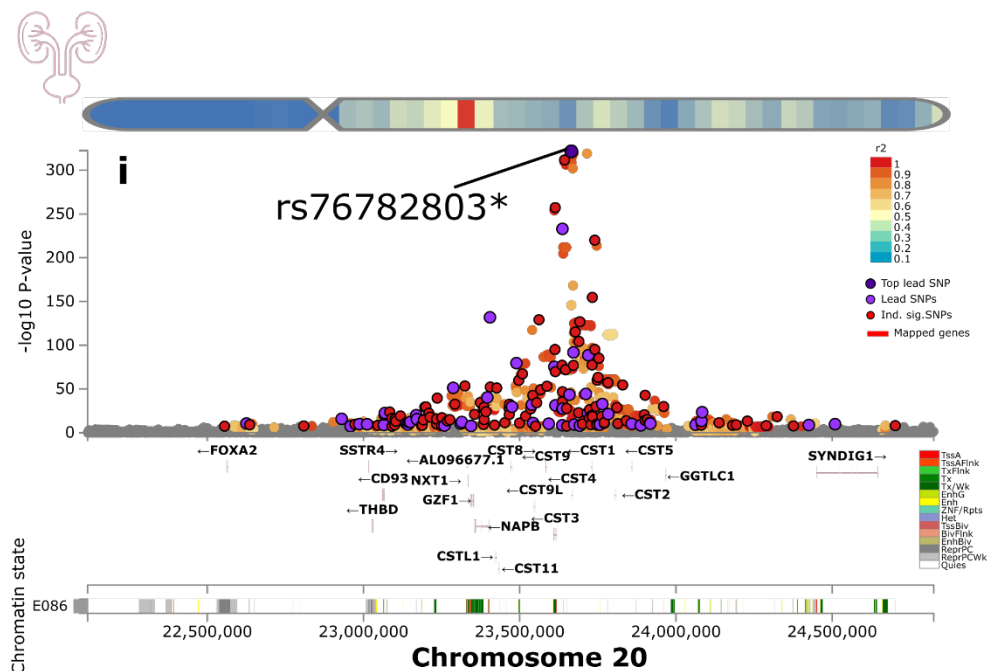

397  
 398 **a-i)** The exemplary genomic locus with the most significant signals for the brain, cardiovascular,  
 399 eye, hepatic, immune, metabolic, musculoskeletal, pulmonary, and renal BAGs. The top lead  
 400 SNP, lead SNPs, and independent significant SNPs are annotated within each locus. We mapped  
 401 the SNPs to the genes and predicted their chromatin states in specific tissues, including the brain  
 402 for the brain BAG, the heart and vascular tissues for the cardiovascular BAG, the iPSC for the  
 403 eye BAG, the liver for the hepatic BAG, the spleen, bone, skin, and thymus tissues for the  
 404 immune BAG, the gastrointestinal tissue for the metabolic BAG, the muscle and bone tissues for  
 405 the musculoskeletal BAG, the lung tissue for the pulmonary BAG, and the kidney for the renal  
 406 BAG, respectively.  
 407



408 **eFigure 12: SNP-based heritability, beta coefficients, and alternative allele frequency using**  
 409 **the brain-BAG comparable populations and different inclusion criteria for the SNPs**

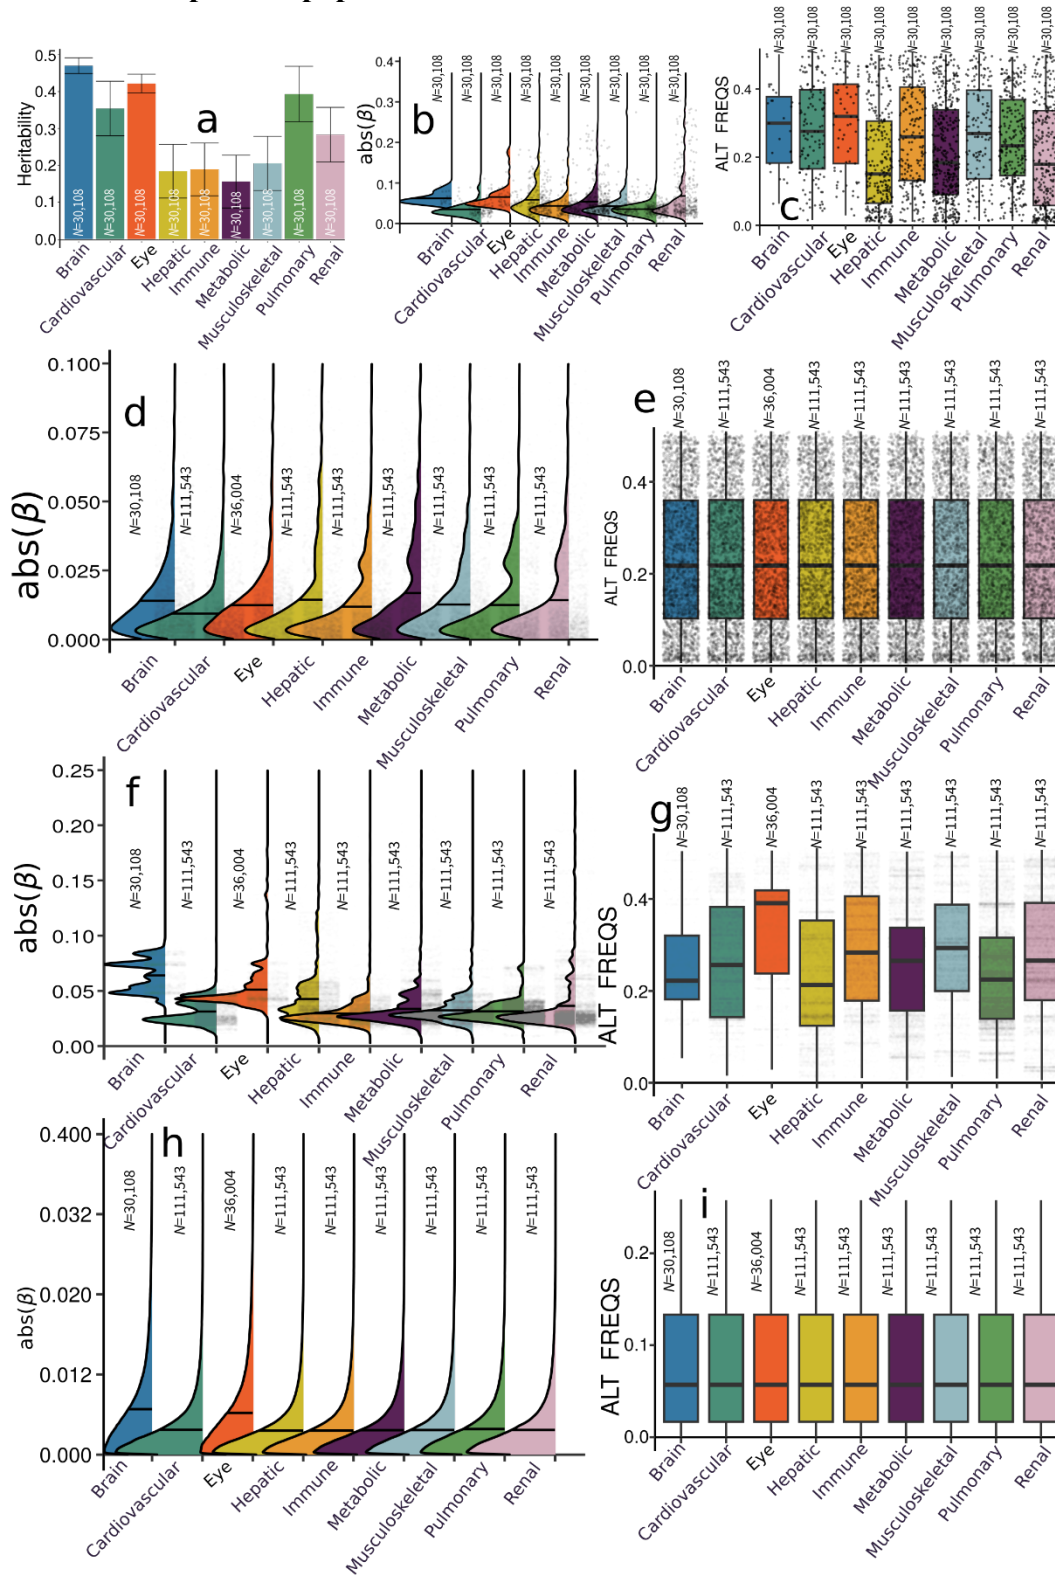

410 **a)** The SNP-based heritability of the nine BAGs using populations from downsampling to the  
 411 brain BAG population. Error bars represent the standard error of the estimated parameters. **b)**  
 412

413 The absolute value of the beta coefficients of the independent significant SNPs of the nine BAG  
414 GWASs using populations from downsampling to the brain BAG population ( $N=30,108$ ); the  
415 independent significant SNPs are shown separately for each BAG. **c)** The alternative (effective)  
416 allele frequency of the independent significant SNPs from the nine BAG GWASs using  
417 populations from downsampling to the brain BAG population ( $N=30,108$ ). **d)** The beta  
418 coefficients of the independent significant SNPs using the original full samples but with all  
419 identified independent significant SNPs across the nine BAG GWASs (with the same number of  
420 SNPs tested), where we see no difference regarding allele frequency in Figure e). **f)** The absolute  
421 value of the beta coefficients of the independent significant SNPs plus the candidate SNPs in LD  
422 of the nine BAG GWASs using the original full samples; the SNPs are shown separately for each  
423 BAG. **g)** The alternative allele frequency for the setting in Figure f). **h)** The absolute beta  
424 coefficients of the nine BAGs using all genome-wide SNPs (the y-axis was truncated to 0.1 for  
425 visualization purposes). **i)** the alternative allele frequency did not differ for Figure h) including  
426 all genome-wide SNPs.  
427

428 **eFigure 13: Trumpet plots of the alternative allele frequency vs. the beta coefficient of the**  
 429 **nine BAG GWASs**

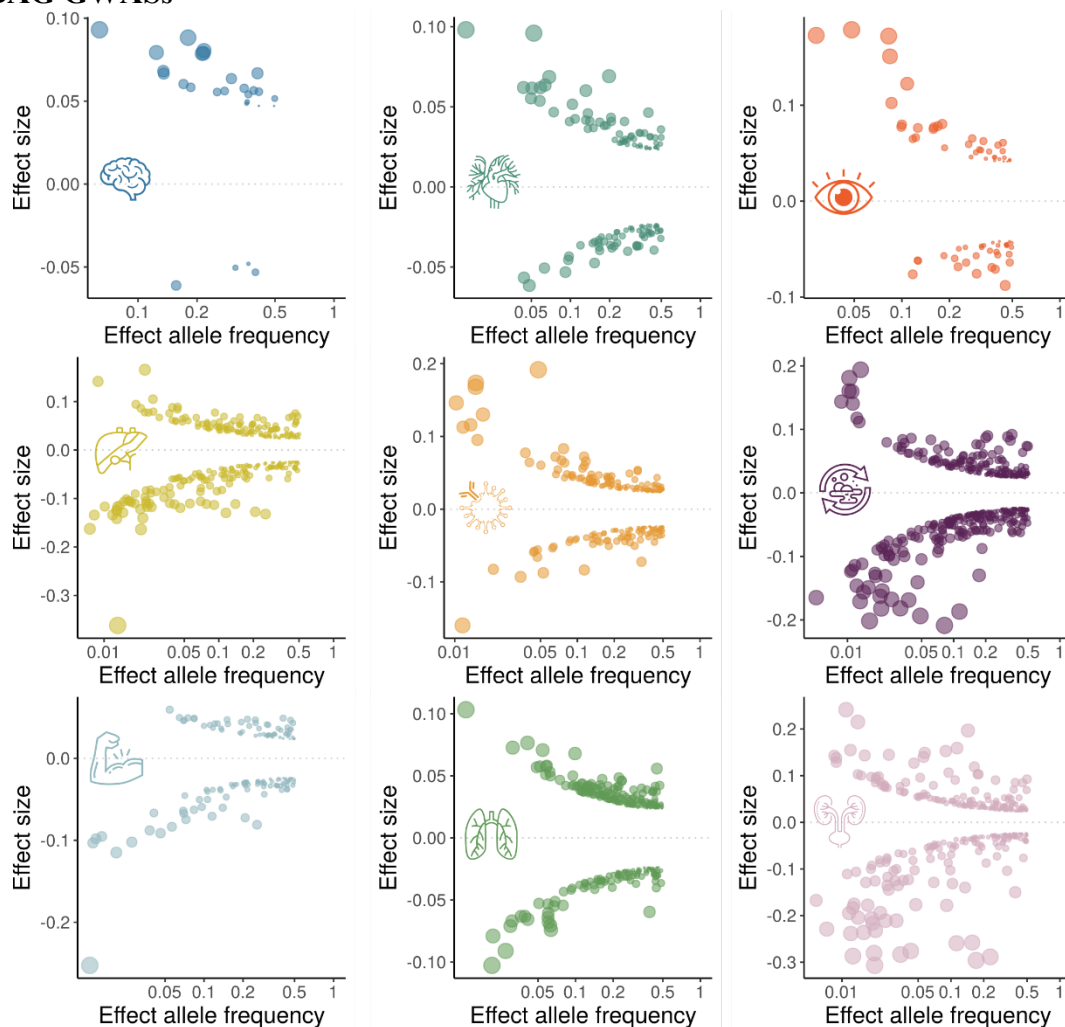

430  
 431 The trumpet plots display the inverse relationship between the alternative (effect) allele  
 432 frequency and the effect size (beta coefficient) for the brain, cardiovascular, eye, hepatic,  
 433 immune, metabolic, musculoskeletal, pulmonary, and renal BAGs. Only the independent  
 434 significant SNPs were considered. The dot size corresponds to the effect size, while the  
 435 transparency of the dot is proportional to its statistical significance.  
 436

437 **eFigure 14: Manhattan and QQ plots for the four pulmonary features used to compute the**  
 438 **pulmonary BAG**

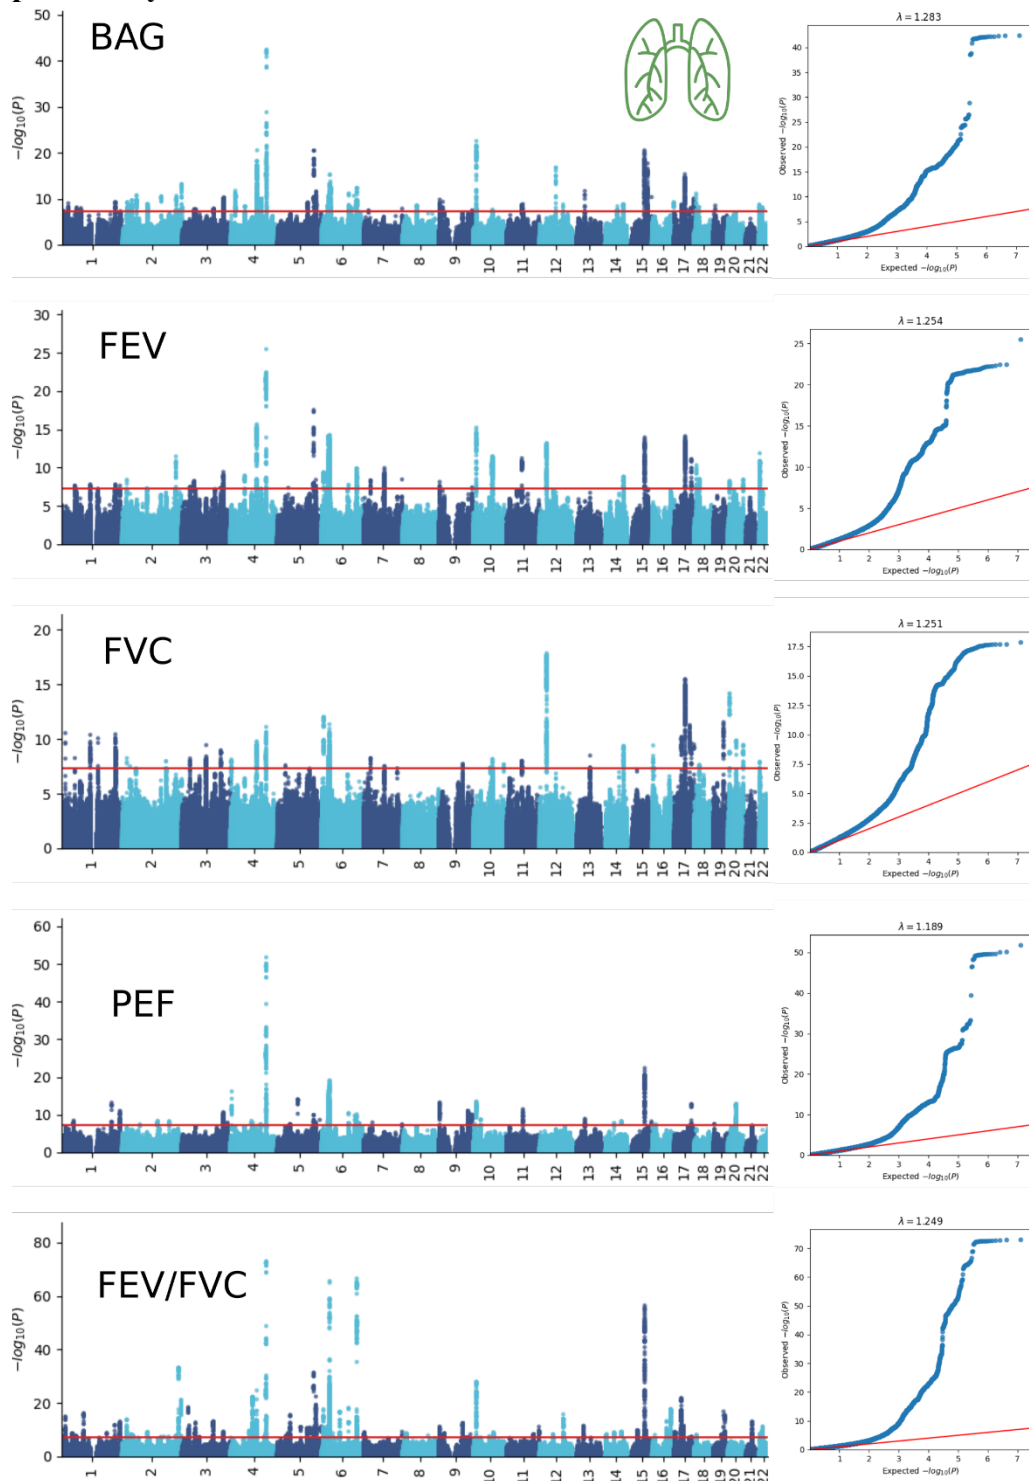

439 The Manhattan and QQ plots for the pulmonary BAG vs. its four features used to compute the  
 440 BAG: forced vital capacity (FVC), forced expiratory volume (FEV), peak expiratory flow (PEF),  
 441 and the ratio of forced expiratory volume to forced vital capacity (FEV/FVC).  
 442  
 443

444 **eFigure 15: Bayesian colocalization signal between the pulmonary BAG and FEV/FVC**  
**chr4; Cytogenetic region: 4q24**

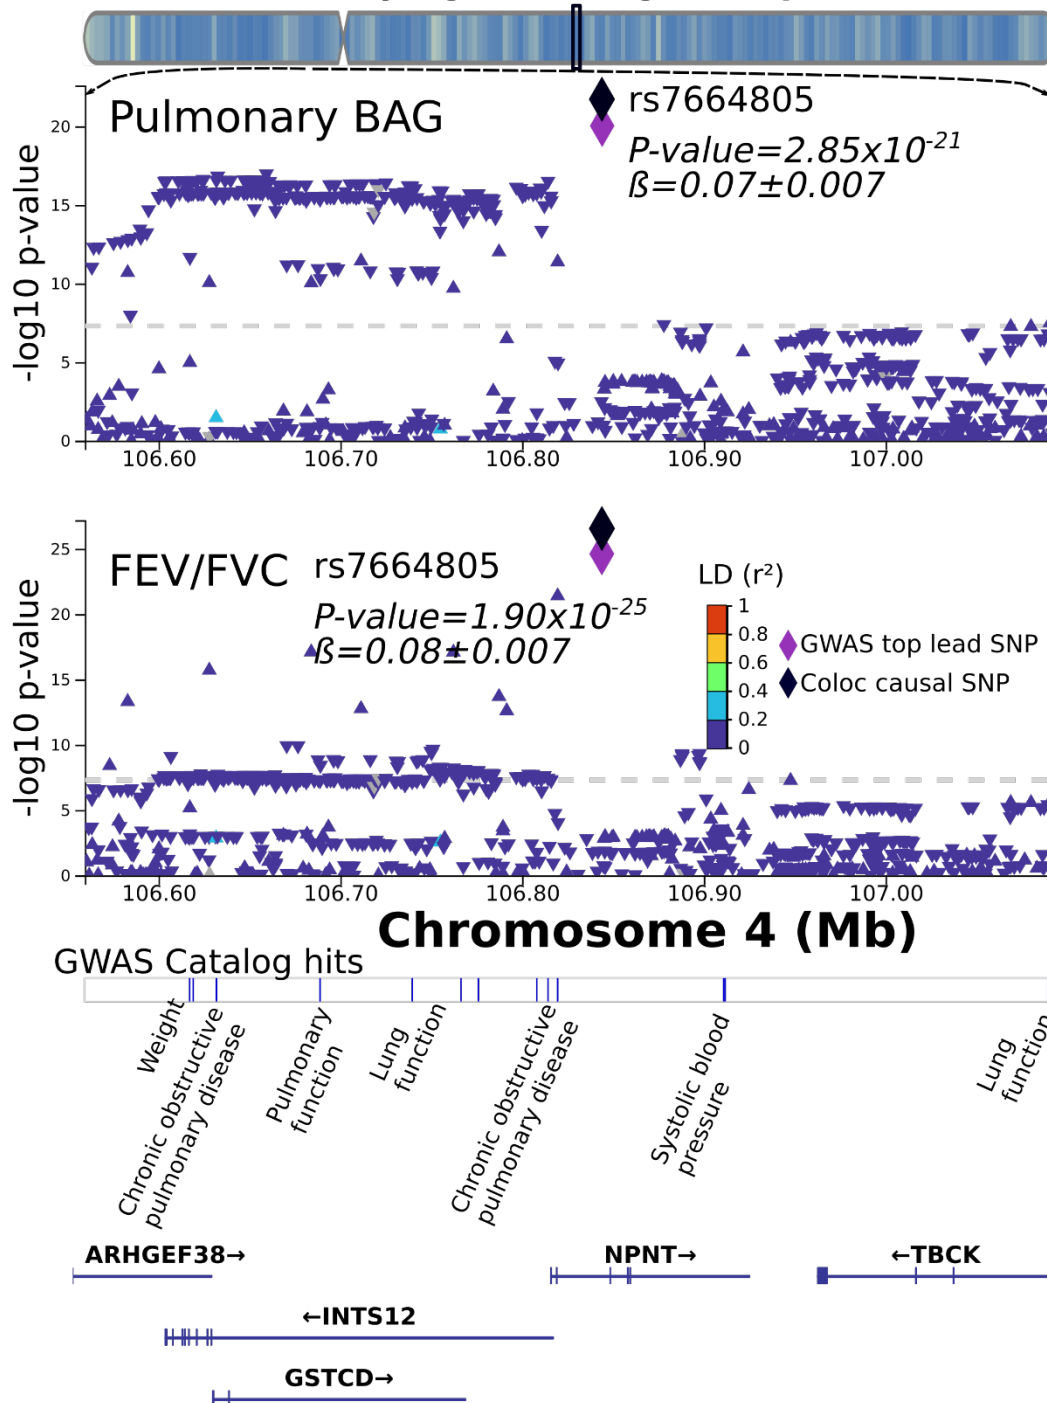

445 We illustrate here the colocalization signal between the pulmonary BAG and the FEV/FCV  
 446 feature at the genomic locus: 4q24 with the top lead SNP (causal SNP: rs7664805). Genetic  
 447 colocalization was evidenced at one locus (4q24) between the pulmonary BAG and the  
 448 FEV/FCV feature. The signed PP.H4.ABF (0.99) denotes the posterior probability (PP) of  
 449 hypothesis H4, which suggests that both traits share the same causal SNP (rs7664805).  
 450  
 451

452 **eFigure 16: Beta coefficients of the significant colocalization signal between the pulmonary**  
 453 **BAG and the four pulmonary features**

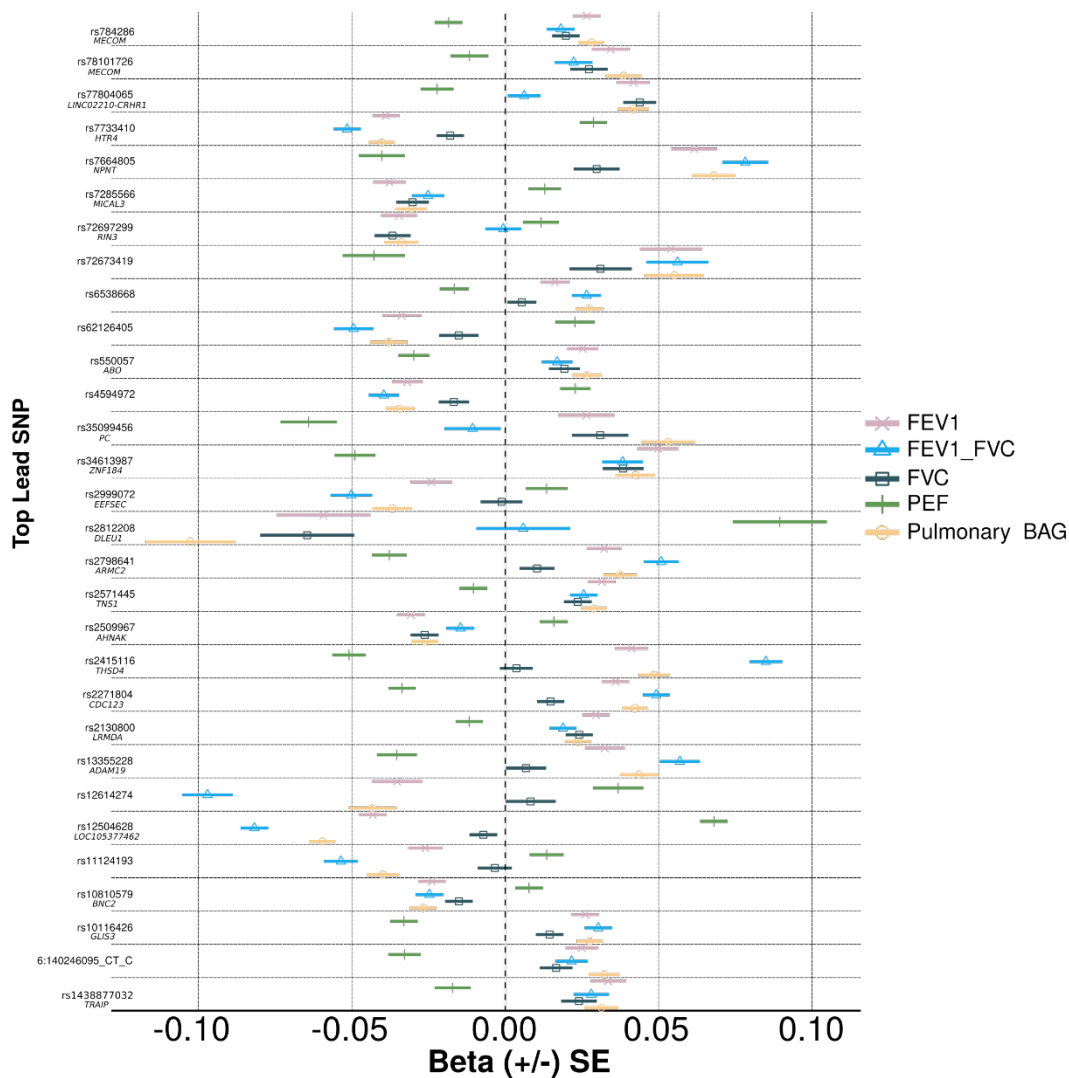

454 We show the beta coefficients of the significant colocalization signals between the pulmonary  
 455 BAG and its underlying four pulmonary features. We ensured that at least one of the four  
 456 pulmonary features achieved the genome-wide P-value threshold, totaling 48 loci (represented by  
 457 its top lead SNP). We also showed the mapped gene when available.  
 458  
 459

## 460 eFigure 17: GSEA using sex-stratified GWAS results

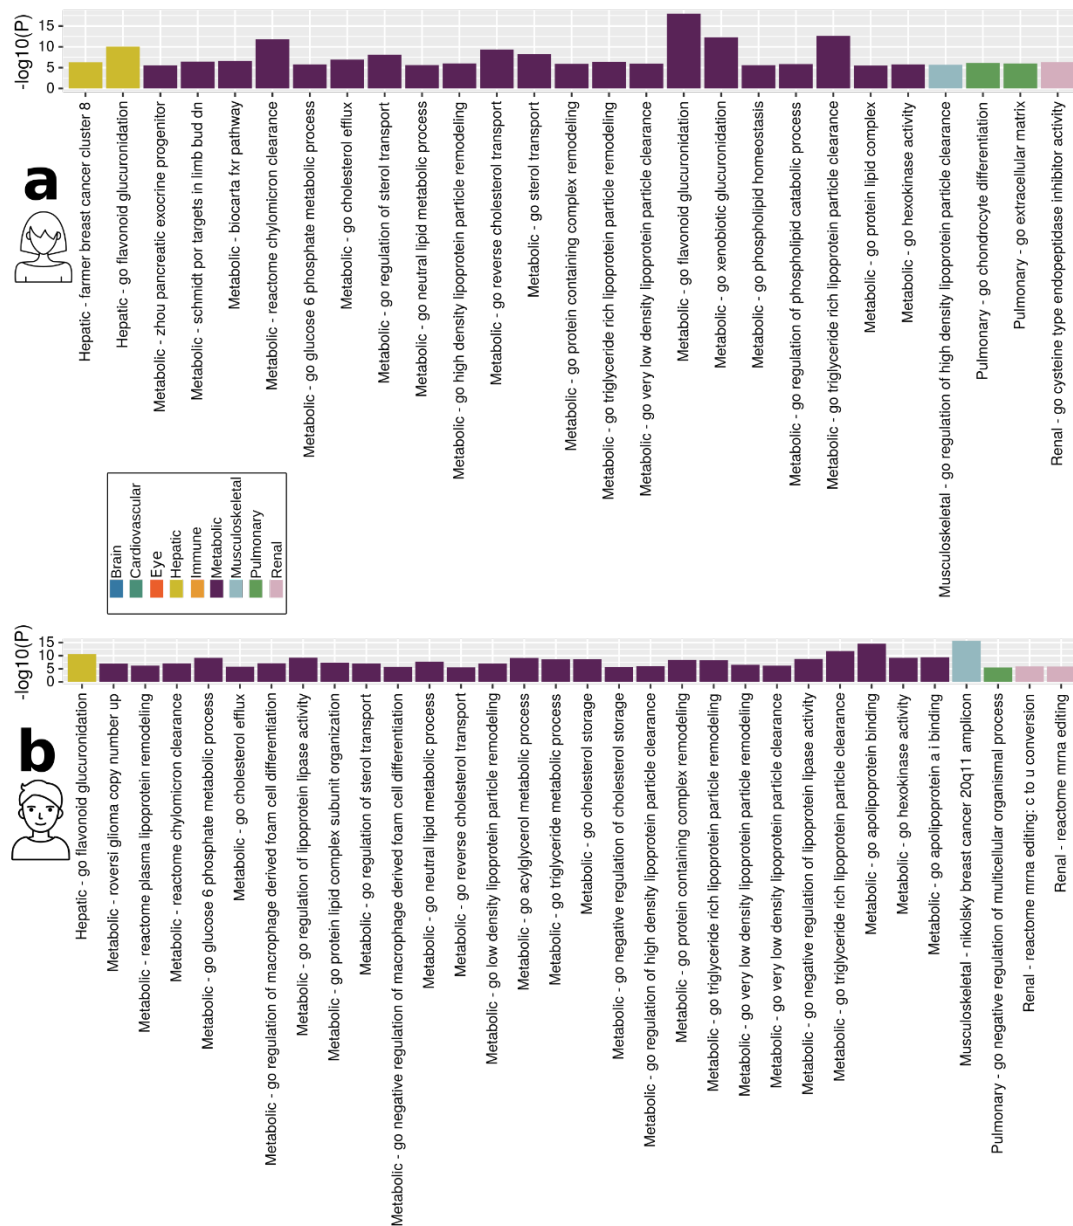

461  
 462 Gene-set enrichment analysis was performed using the GWAS summary statistics specific to  
 463 females (a) and males (b).  
 464

465 **eFigure 18: TEA correlations using sex-stratified GWAS results**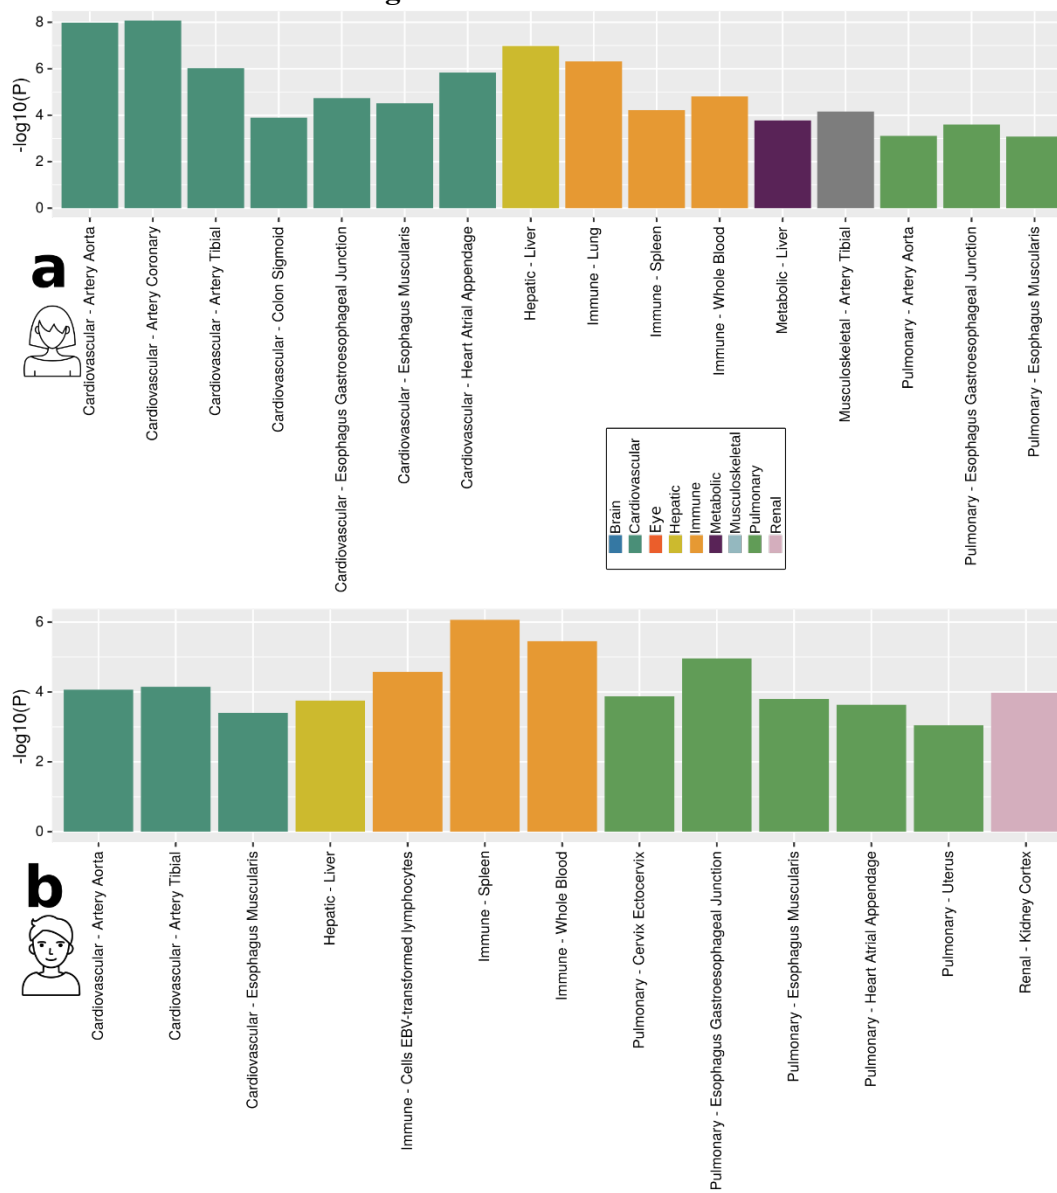

466  
 467 Tissue-specific enrichment analysis was performed using the GWAS summary statistics specific  
 468 to females (a) and males (b).  
 469



470 eFigure 19: Genetic correlations using sex-stratified GWAS results

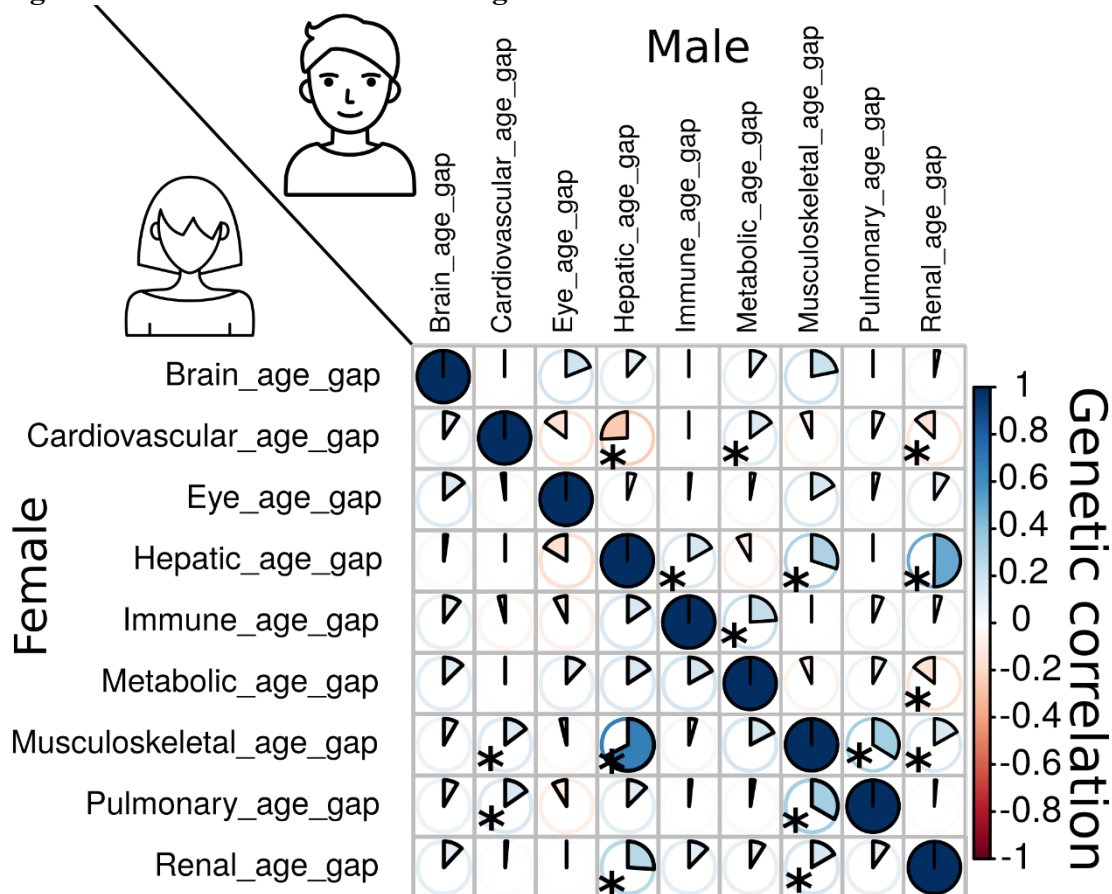

471 The  
 472 Genetic correlation between each pair of BAGs using sex-stratified GWAS summary statistics  
 473 from our analyses. Most of the genetic correlations showed consistency between females and  
 474 males, albeit sex differences are evident in certain BAGs, particularly in the cardiovascular BAG  
 475 results. Specifically, males exhibit dominant correlations between cardiovascular BAGs and  
 476 hepatic and renal BAGs, while females demonstrate specific correlations with musculoskeletal  
 477 and pulmonary BAGs.  
 478

479 **eFigure 20: Mendelian randomization sensitivity check for the hepatic BAG on the**  
 480 **musculoskeletal BAG**

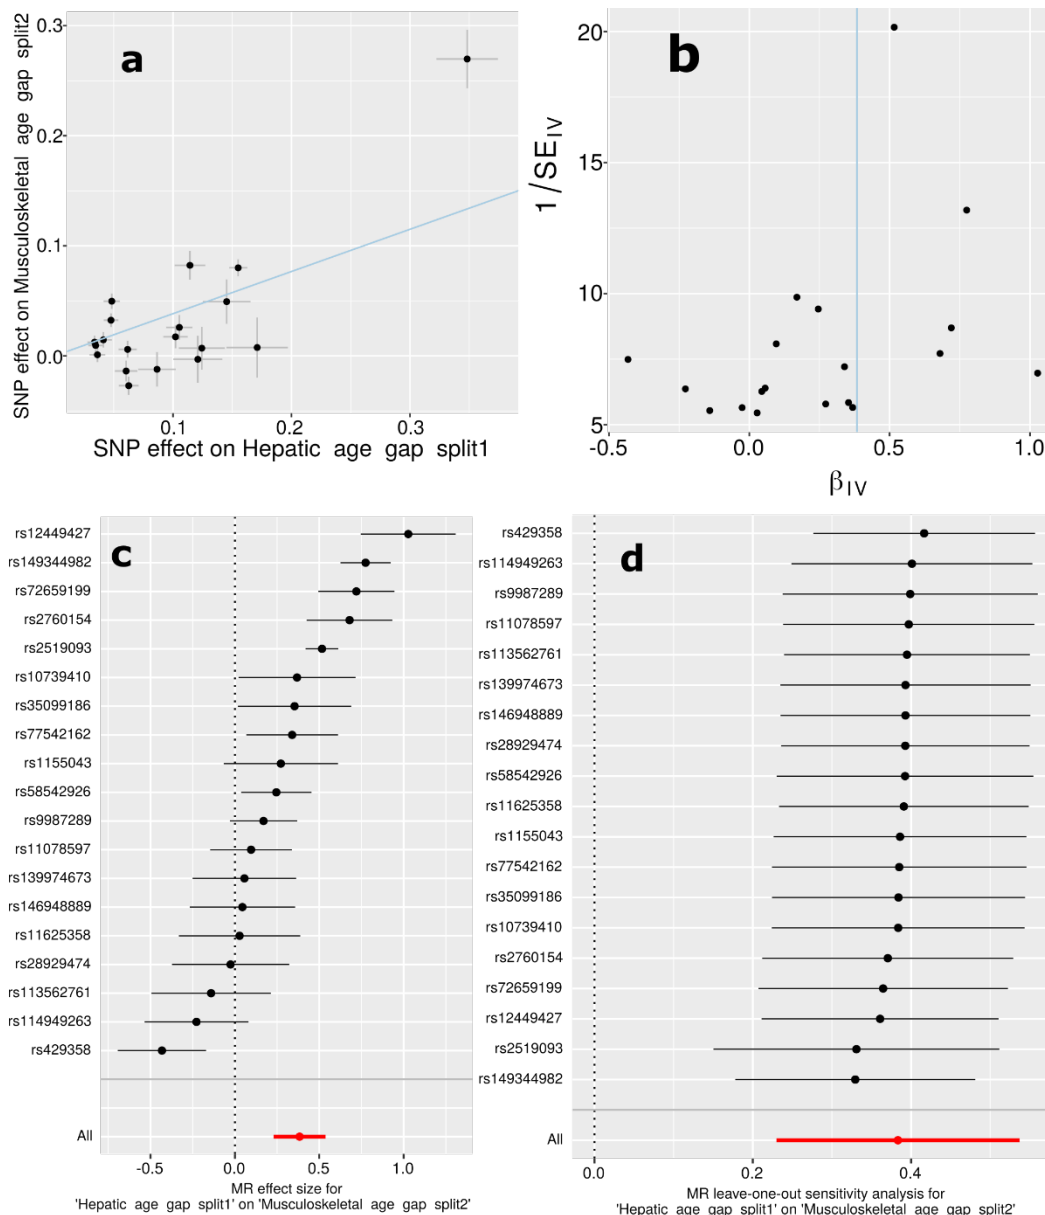

481 **a)** Scatter plot for the MR effect sizes of the exposure variable (hepatic BAG,  $x$ -axis, SD units)  
 482 and the outcome variable (musculoskeletal BAG,  $y$ -axis, log OR) with standard error bars. The  
 483 slopes of the regression line correspond to the causal effect sizes estimated by the IVW  
 484 estimator. **b)** Funnel plot for the relationship between the causal effect of the exposure variable  
 485 on the outcome variable. Each dot represents MR effect sizes estimated using each SNP as a  
 486 separate instrument against the inverse of the standard error of the causal estimate. The vertical  
 487 red line shows the MR estimates using all SNPs. **c)** Forest plot for the single-SNP MR results.  
 488 Each line represents the MR effect (log OR) for the exposure variable on the outcome variable  
 489 using only one SNP; the red line shows the MR effect using all SNPs together. **d)** Leave-one-out  
 490 analysis of the exposure variable on the outcome variable. Each row represents the MR effect  
 491

492 (log OR) and the 95% CI by excluding that SNP from the analysis. The red line depicts the IVW  
493 estimator using all SNPs.  
494

495 **eFigure 21: Mendelian randomization sensitivity check for the musculoskeletal BAG on the**  
 496 **hepatic BAG**

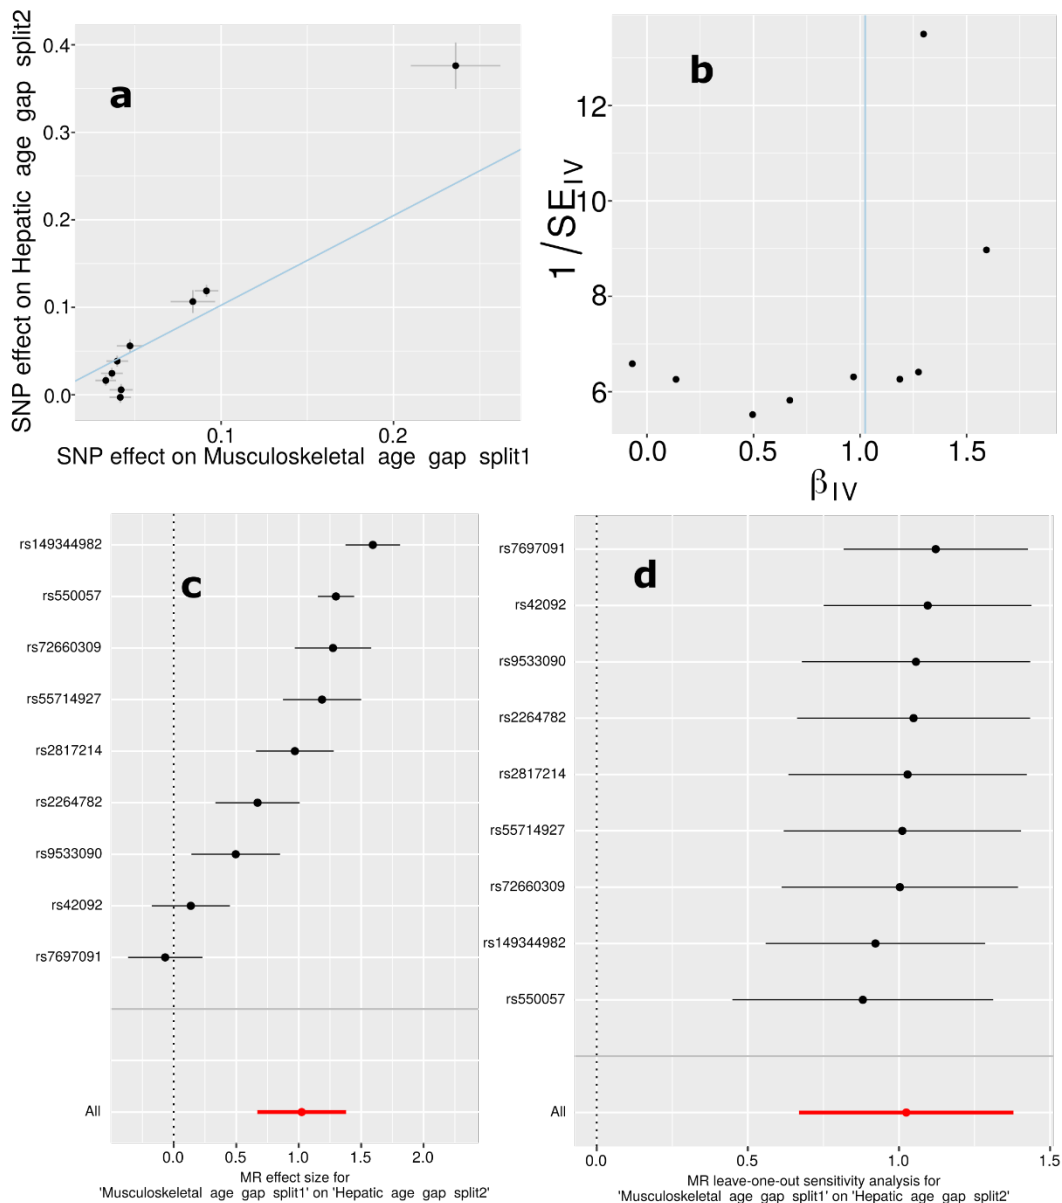

497 **a)** Scatter plot for the MR effect sizes of the exposure variable (musculoskeletal BAG, x-axis,  
 498 SD units) and the outcome variable (hepatic BAG, y-axis, log OR) with standard error bars. The  
 499 slopes of the regression line correspond to the causal effect sizes estimated by the IVW  
 500 estimator. **b)** Funnel plot for the relationship between the causal effect of the exposure variable  
 501 on the outcome variable. Each dot represents MR effect sizes estimated using each SNP as a  
 502 separate instrument against the inverse of the standard error of the causal estimate. The vertical  
 503 red line shows the MR estimates using all SNPs. **c)** Forest plot for the single-SNP MR results.  
 504 Each line represents the MR effect (log OR) for the exposure variable on the outcome variable  
 505 using only one SNP; the red line shows the MR effect using all SNPs together. **d)** Leave-one-out  
 506 analysis of the exposure variable on the outcome variable. Each row represents the MR effect  
 507

508 (log OR) and the 95% CI by excluding that SNP from the analysis. The red line depicts the IVW  
509 estimator using all SNPs.  
510

511 **eFigure 22: Mendelian randomization sensitivity check for AD on the brain BAG**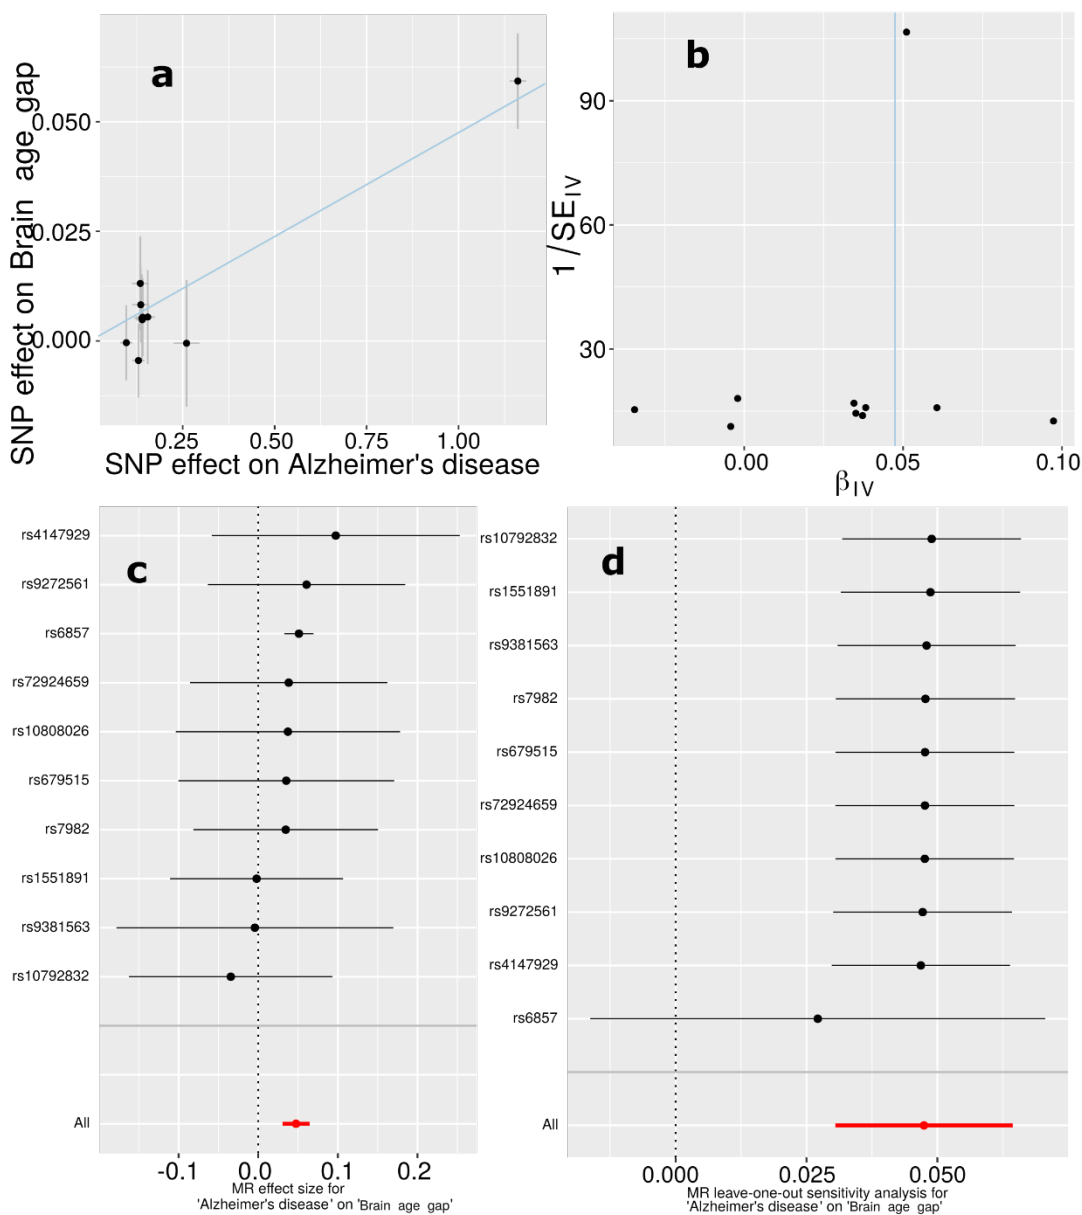

512  
 513 **a)** Scatter plot for the MR effect sizes of the exposure variable (AD,  $x$ -axis, SD units) and the  
 514 outcome variable (brain BAG,  $y$ -axis, log OR) with standard error bars. The slopes of the  
 515 regression line correspond to the causal effect sizes estimated by the IVW estimator. **b)** Funnel  
 516 plot for the relationship between the causal effect of the exposure variable on the outcome  
 517 variable. Each dot represents MR effect sizes estimated using each SNP as a separate instrument  
 518 against the inverse of the standard error of the causal estimate. The vertical red line shows the  
 519 MR estimates using all SNPs. **c)** Forest plot for the single-SNP MR results. Each line represents  
 520 the MR effect (log OR) for the exposure variable on the outcome variable using only one SNP;  
 521 the red line shows the MR effect using all SNPs together. **d)** Leave-one-out analysis of the  
 522 exposure variable on the outcome variable. Each row represents the MR effect (log OR) and the  
 523 95% CI by excluding that SNP from the analysis. The red line depicts the IVW estimator using  
 524 all SNPs.

525 **eFigure 23: Mendelian randomization sensitivity check for AD on the hepatic BAG**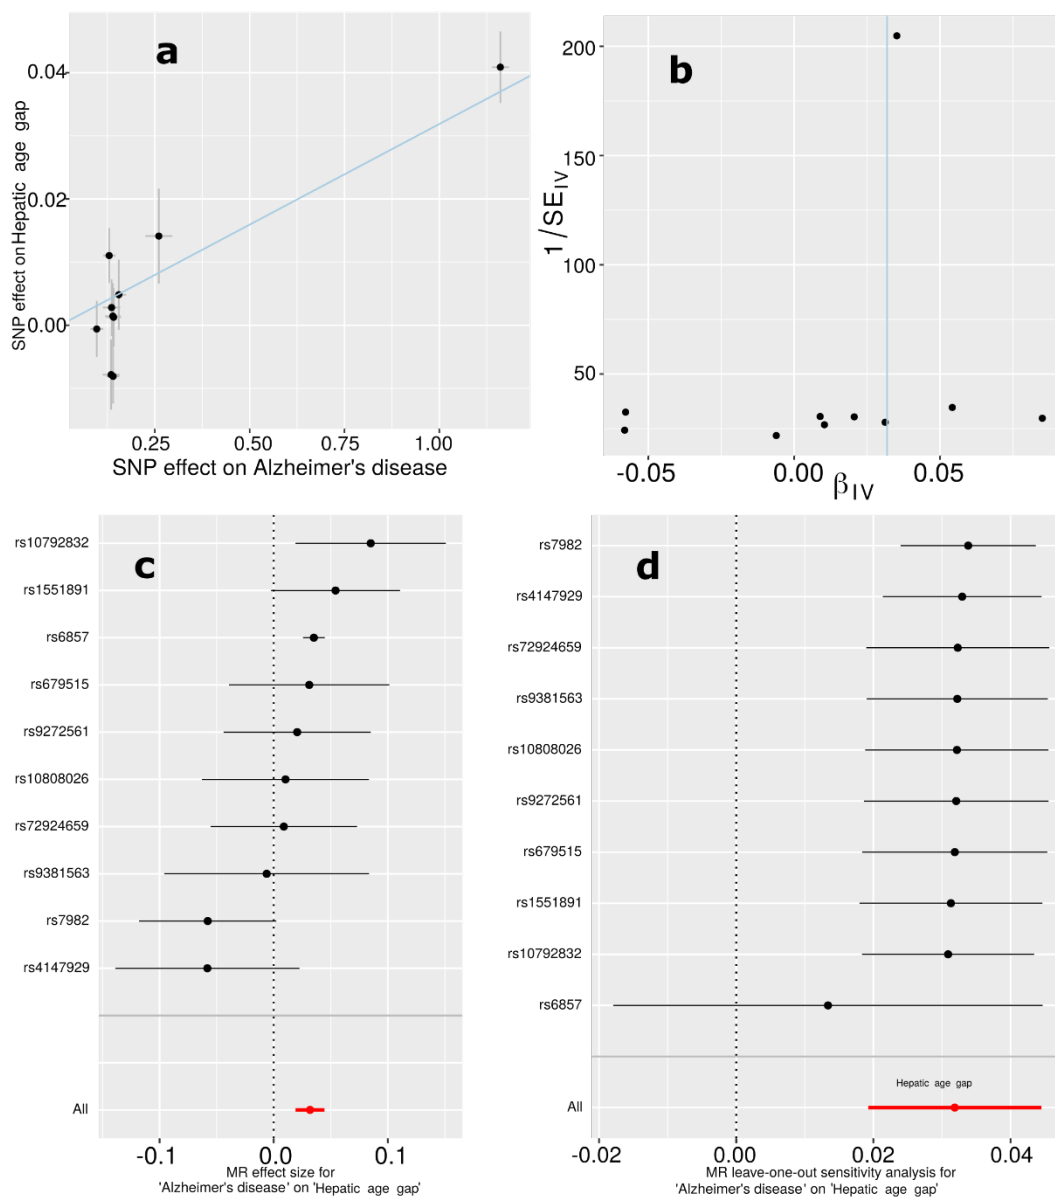

526  
 527 **a)** Scatter plot for the MR effect sizes of the exposure variable (AD,  $x$ -axis, SD units) and the  
 528 outcome variable (hepatic BAG,  $y$ -axis, log OR) with standard error bars. The slopes of the  
 529 regression line correspond to the causal effect sizes estimated by the IVW estimator. **b)** Funnel  
 530 plot for the relationship between the causal effect of the exposure variable on the outcome  
 531 variable. Each dot represents MR effect sizes estimated using each SNP as a separate instrument  
 532 against the inverse of the standard error of the causal estimate. The vertical red line shows the  
 533 MR estimates using all SNPs. **c)** Forest plot for the single-SNP MR results. Each line represents  
 534 the MR effect (log OR) for the exposure variable on the outcome variable using only one SNP;  
 535 the red line shows the MR effect using all SNPs together. **d)** Leave-one-out analysis of the  
 536 exposure variable on the outcome variable. Each row represents the MR effect (log OR) and the  
 537 95% CI by excluding that SNP from the analysis. The red line depicts the IVW estimator using  
 538 all SNPs.





540 eFigure 24: Mendelian randomization sensitivity check for Crohn's disease on the hepatic  
 541 BAG

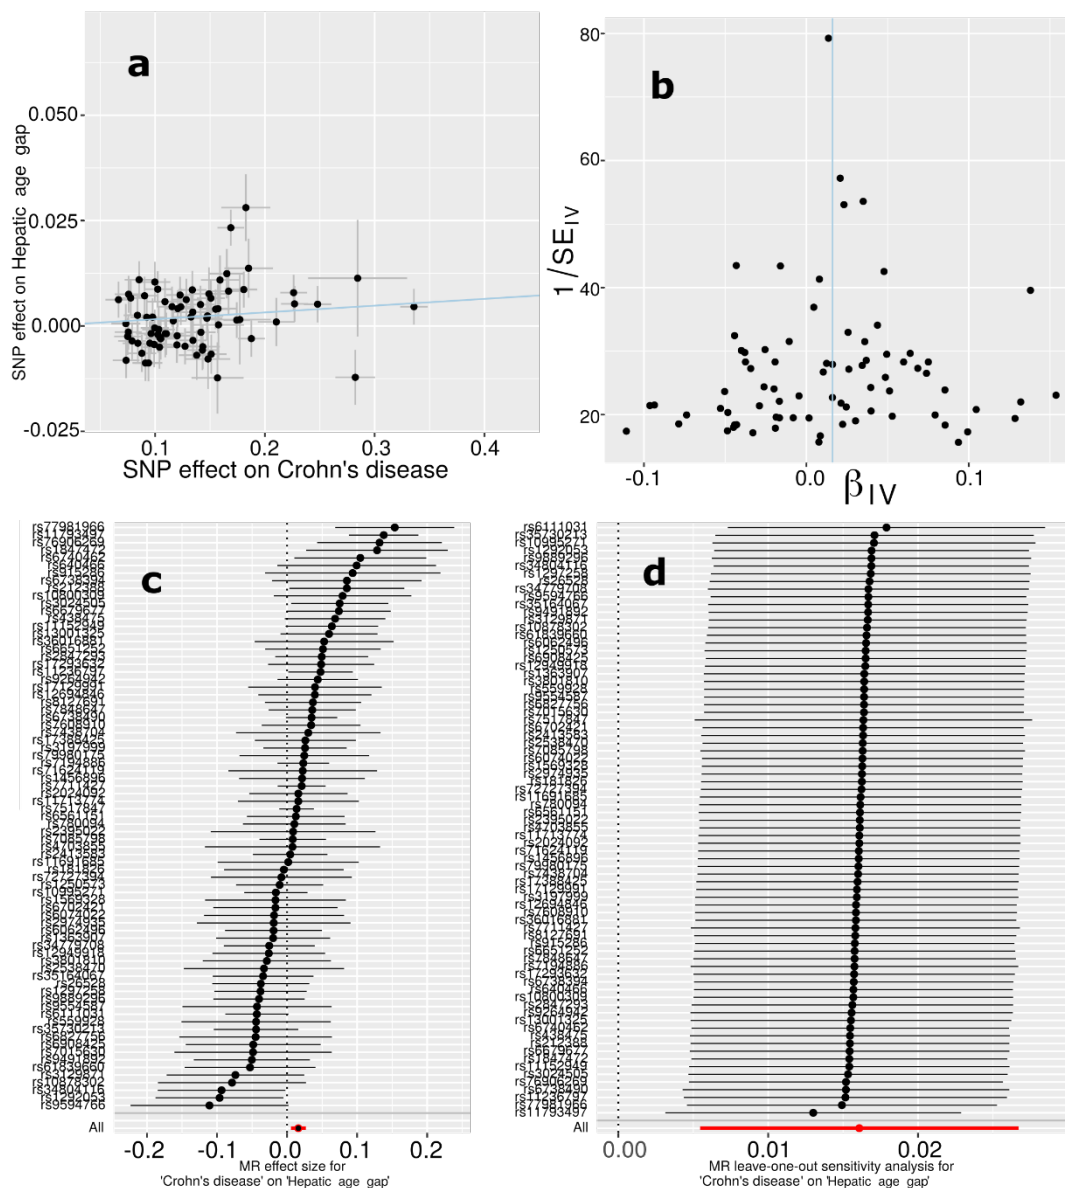

542  
 543 **a)** Scatter plot for the MR effect sizes of the exposure variable (Crohn's disease, x-axis, SD units)  
 544 and the outcome variable (hepatic BAG, y-axis, log OR) with standard error bars. The slopes of  
 545 the regression line correspond to the causal effect sizes estimated by the IVW estimator. **b)**  
 546 Funnel plot for the relationship between the causal effect of the exposure variable on the  
 547 outcome variable. Each dot represents MR effect sizes estimated using each SNP as a separate  
 548 instrument against the inverse of the standard error of the causal estimate. The vertical red line  
 549 shows the MR estimates using all SNPs. **c)** Forest plot for the single-SNP MR results. Each line  
 550 represents the MR effect (log OR) for the exposure variable on the outcome variable using only  
 551 one SNP; the red line shows the MR effect using all SNPs together. **d)** Leave-one-out analysis of  
 552 the exposure variable on the outcome variable. Each row represents the MR effect (log OR) and

553 the 95% CI by excluding that SNP from the analysis. The red line depicts the IVW estimator  
554 using all SNPs.  
555

556 **eFigure 25: Mendelian randomization sensitivity check for body weight on the immune**  
 557 **BAG**

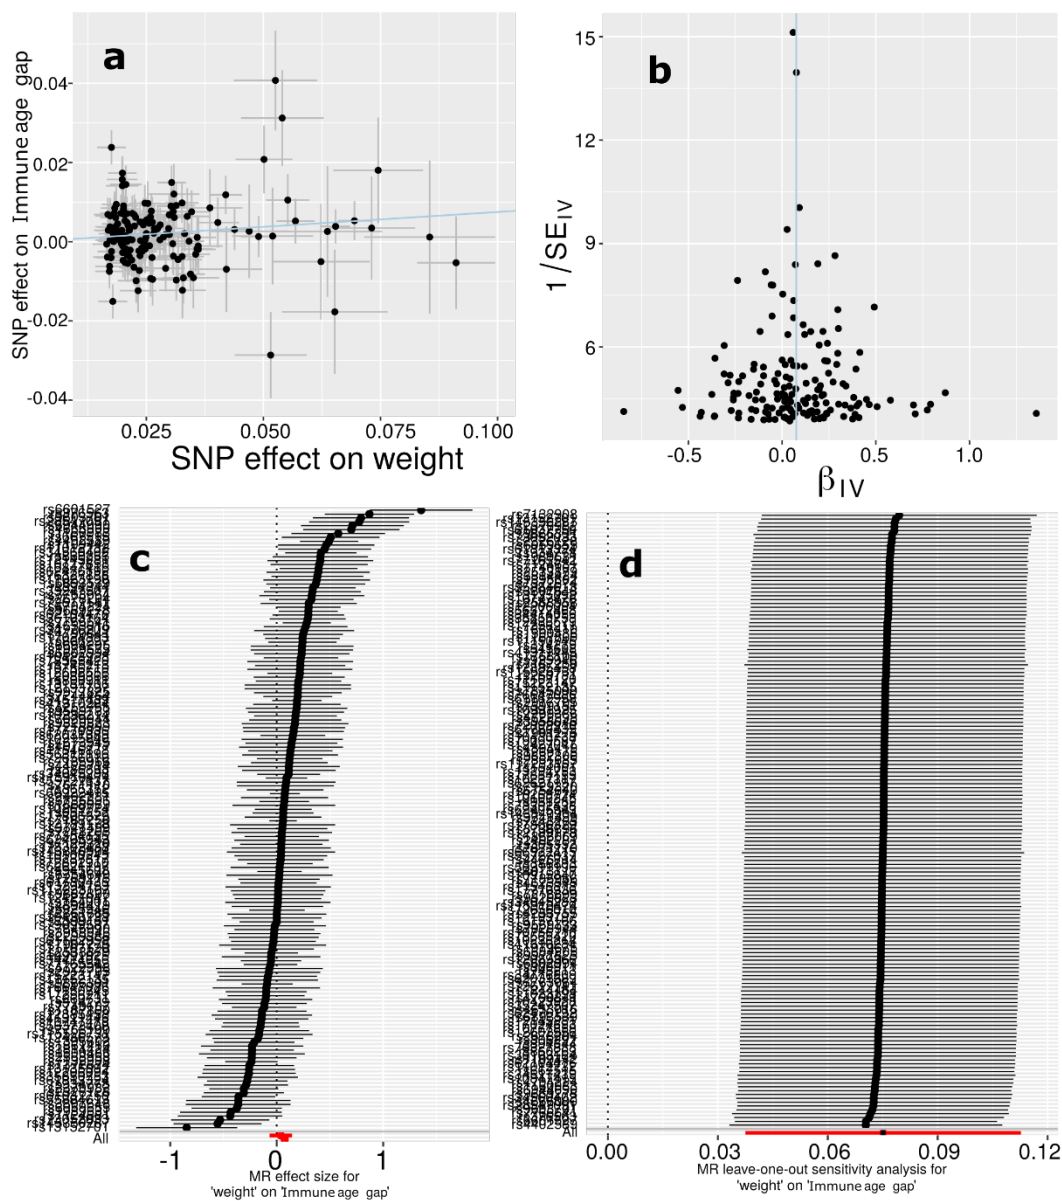

558  
 559 **a)** Scatter plot for the MR effect sizes of the exposure variable (body weight,  $x$ -axis, SD units)  
 560 and the outcome variable (immune BAG,  $y$ -axis, log OR) with standard error bars. The slopes of  
 561 the regression line correspond to the causal effect sizes estimated by the IVW estimator. **b)**  
 562 Funnel plot for the relationship between the causal effect of the exposure variable on the  
 563 outcome variable. Each dot represents MR effect sizes estimated using each SNP as a separate  
 564 instrument against the inverse of the standard error of the causal estimate. The vertical red line  
 565 shows the MR estimates using all SNPs. **c)** Forest plot for the single-SNP MR results. Each line  
 566 represents the MR effect (log OR) for the exposure variable on the outcome variable using only  
 567 one SNP; the red line shows the MR effect using all SNPs together. **d)** Leave-one-out analysis of  
 568 the exposure variable on the outcome variable. Each row represents the MR effect (log OR) and

569 the 95% CI by excluding that SNP from the analysis. The red line depicts the IVW estimator  
570 using all SNPs.  
571

572 **eFigure 26: Mendelian randomization sensitivity check for type 2 diabetes on the metabolic**  
 573 **BAG**

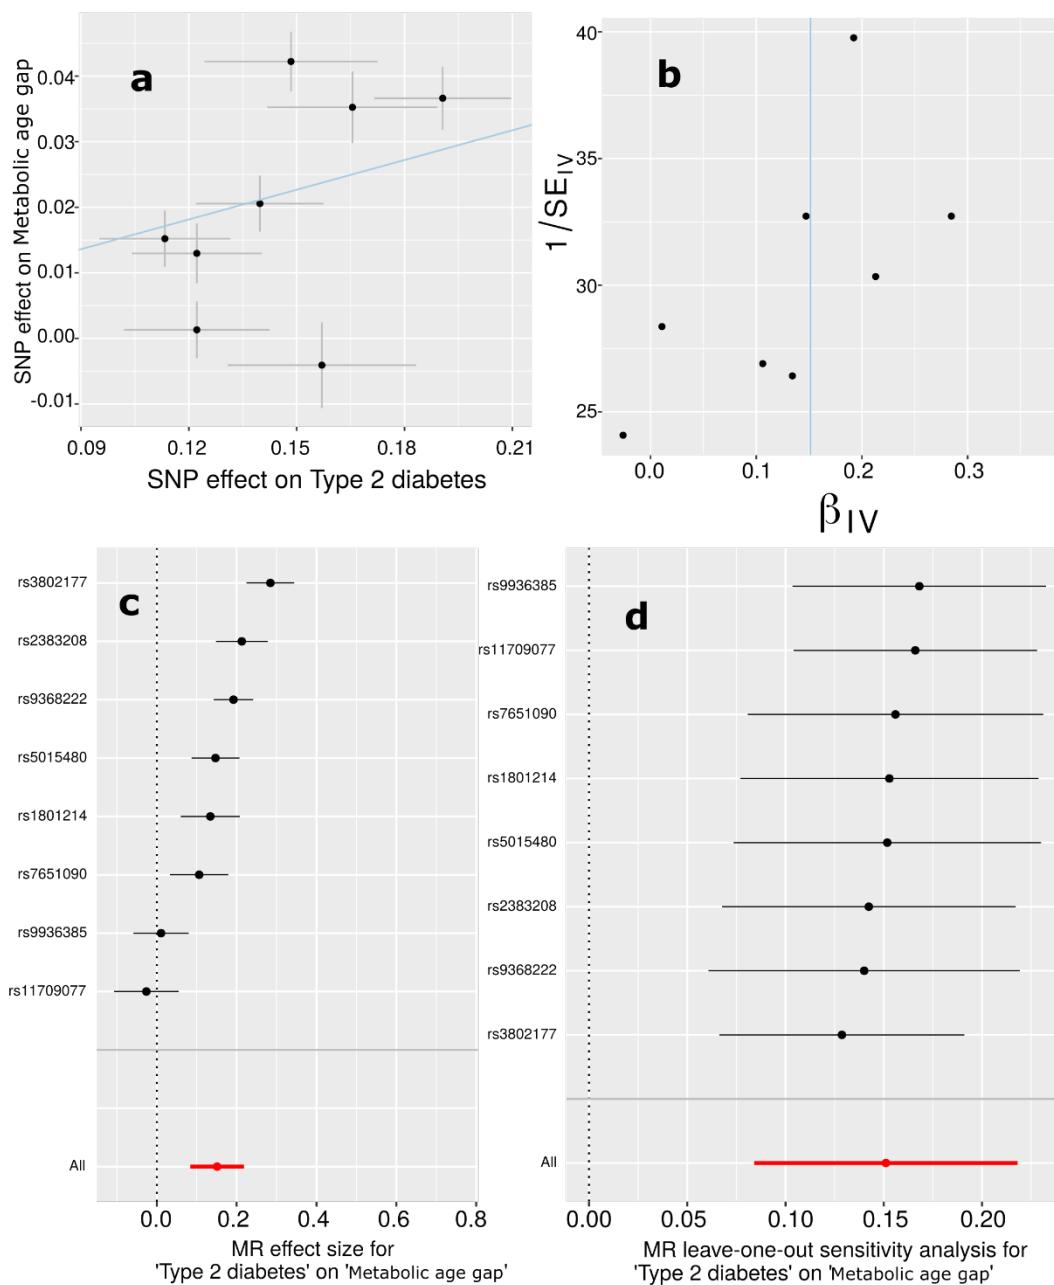

574  
 575 **a)** Scatter plot for the MR effect sizes of the exposure variable (type 2 diabetes,  $x$ -axis, SD units)  
 576 and the outcome variable (metabolic BAG,  $y$ -axis, log OR) with standard error bars. The slopes  
 577 of the regression line correspond to the causal effect sizes estimated by the IVW estimator. **b)**  
 578 Funnel plot for the relationship between the causal effect of the exposure variable on the  
 579 outcome variable. Each dot represents MR effect sizes estimated using each SNP as a separate  
 580 instrument against the inverse of the standard error of the causal estimate. The vertical red line  
 581 shows the MR estimates using all SNPs. **c)** Forest plot for the single-SNP MR results. Each line  
 582 represents the MR effect (log OR) for the exposure variable on the outcome variable using only

583 one SNP; the red line shows the MR effect using all SNPs together. **d)** Leave-one-out analysis of  
584 the exposure variable on the outcome variable. Each row represents the MR effect (log OR) and  
585 the 95% CI by excluding that SNP from the analysis. The red line depicts the IVW estimator  
586 using all SNPs.  
587

588 **eFigure 27: Mendelian randomization sensitivity check for AD on the musculoskeletal BAG**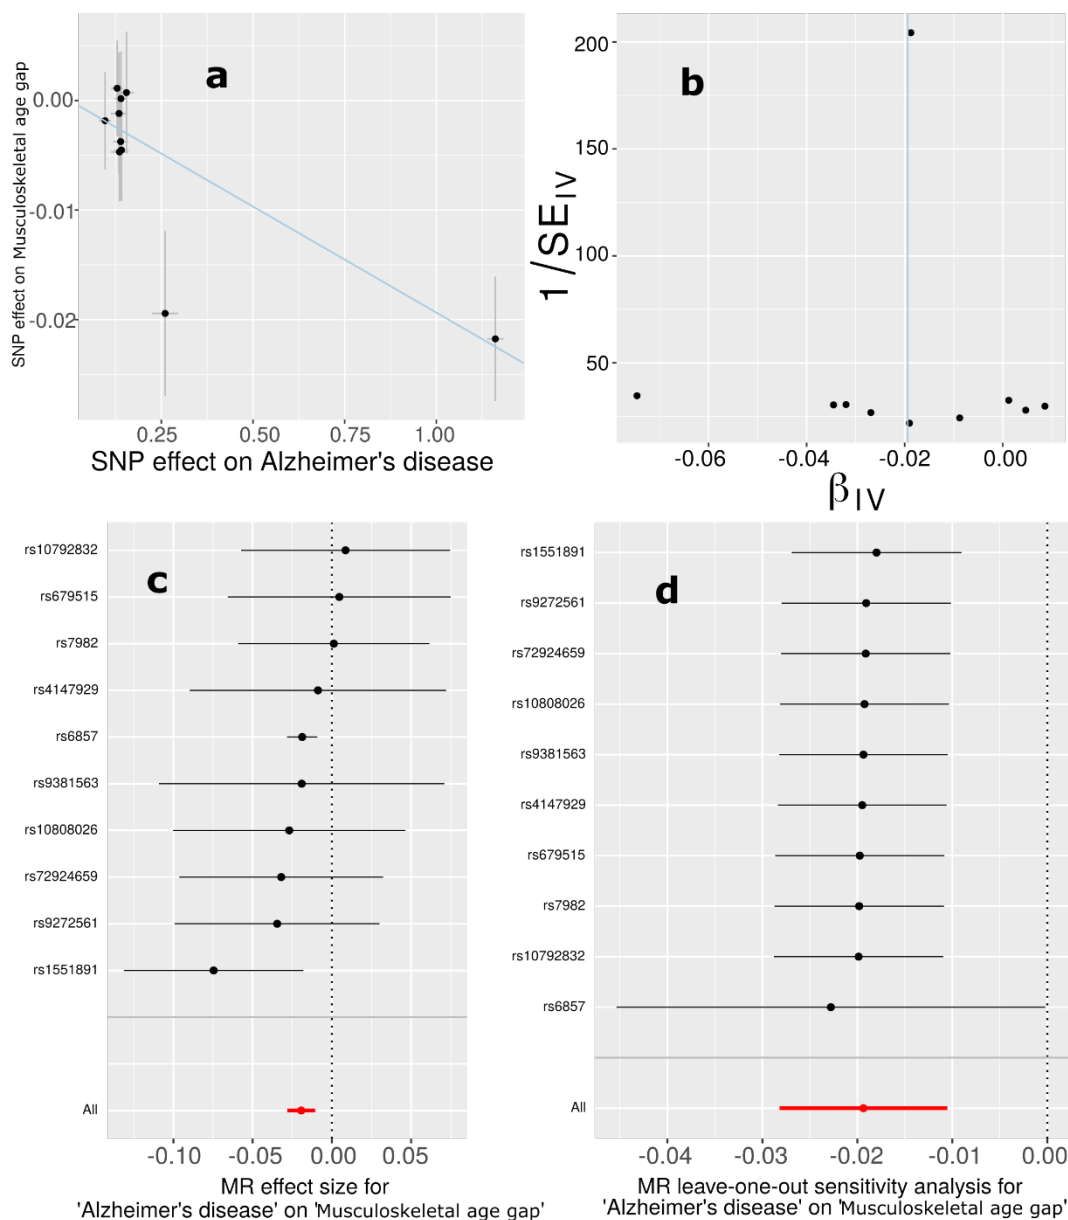

589 **a)** Scatter plot for the MR effect sizes of the exposure variable (AD,  $x$ -axis, SD units) and the  
 590 outcome variable (musculoskeletal BAG,  $y$ -axis, log OR) with standard error bars. The slopes of  
 591 the regression line correspond to the causal effect sizes estimated by the IVW estimator. **b)**  
 592 Funnel plot for the relationship between the causal effect of the exposure variable on the  
 593 outcome variable. Each dot represents MR effect sizes estimated using each SNP as a separate  
 594 instrument against the inverse of the standard error of the causal estimate. The vertical red line  
 595 shows the MR estimates using all SNPs. **c)** Forest plot for the single-SNP MR results. Each line  
 596 represents the MR effect (log OR) for the exposure variable on the outcome variable using only  
 597 one SNP; the red line shows the MR effect using all SNPs together. **d)** Leave-one-out analysis of  
 598 the exposure variable on the outcome variable. Each row represents the MR effect (log OR) and  
 599 the 95% CI by excluding that SNP from the analysis. The red line depicts the IVW estimator  
 600 using all SNPs.  
 601





603 **eFigure 28: Mendelian randomization sensitivity check for IBD on the musculoskeletal**  
 604 **BAG**

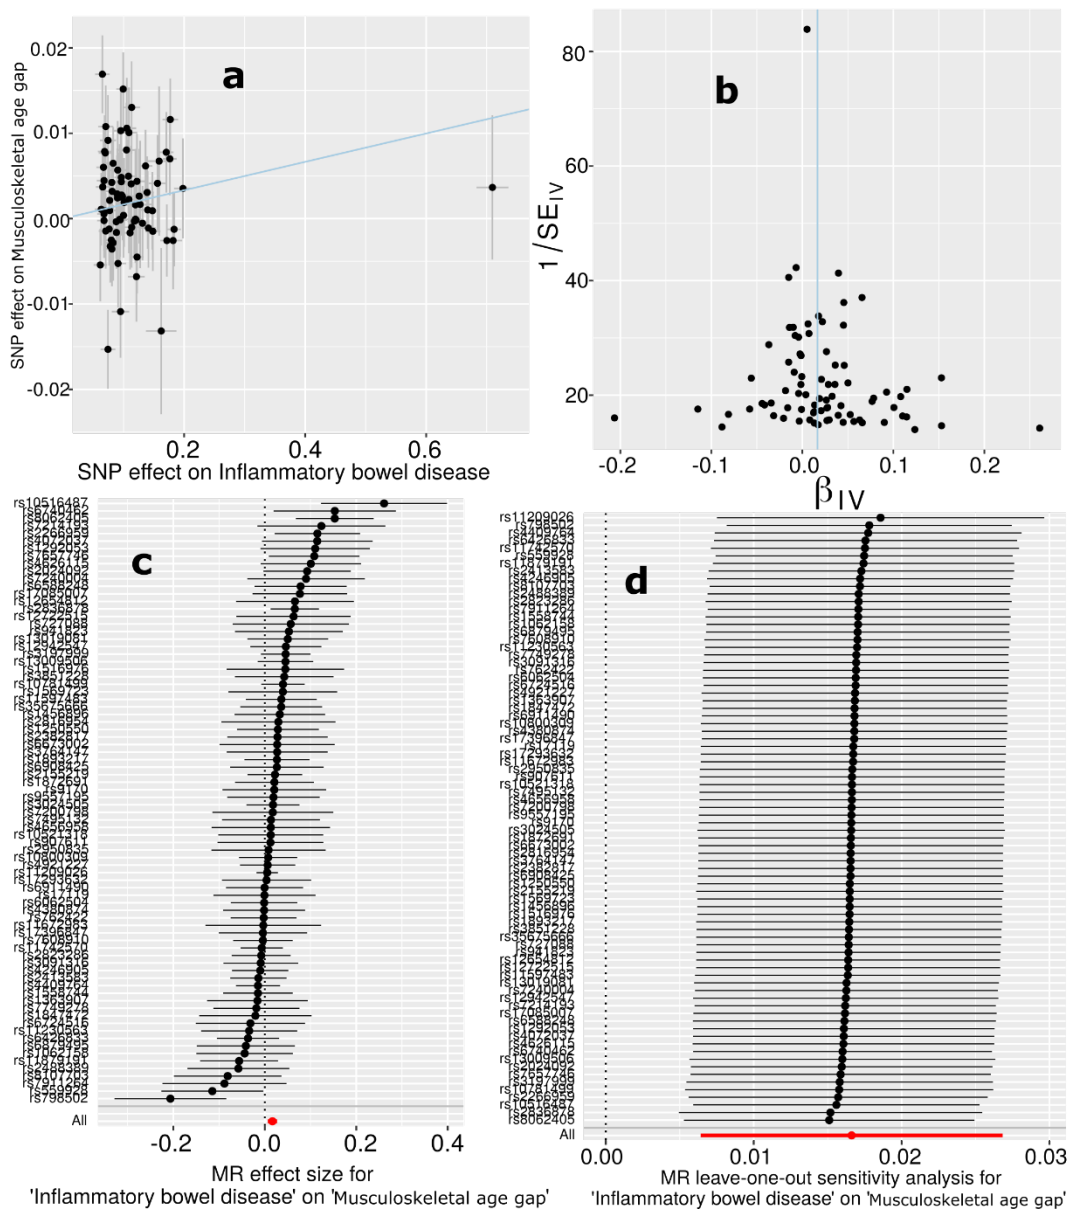

605  
 606 **a)** Scatter plot for the MR effect sizes of the exposure variable (IBD,  $x$ -axis, SD units) and the  
 607 outcome variable (musculoskeletal BAG,  $y$ -axis, log OR) with standard error bars. The slopes of  
 608 the regression line correspond to the causal effect sizes estimated by the IVW estimator. **b)**  
 609 Funnel plot for the relationship between the causal effect of the exposure variable on the  
 610 outcome variable. Each dot represents MR effect sizes estimated using each SNP as a separate  
 611 instrument against the inverse of the standard error of the causal estimate. The vertical red line  
 612 shows the MR estimates using all SNPs. **c)** Forest plot for the single-SNP MR results. Each line  
 613 represents the MR effect (log OR) for the exposure variable on the outcome variable using only  
 614 one SNP; the red line shows the MR effect using all SNPs together. **d)** Leave-one-out analysis of  
 615 the exposure variable on the outcome variable. Each row represents the MR effect (log OR) and

616 the 95% CI by excluding that SNP from the analysis. The red line depicts the IVW estimator  
617 using all SNPs.  
618

619 **eFigure 29: Mendelian randomization sensitivity check for PBC on the musculoskeletal**  
 620 **BAG**

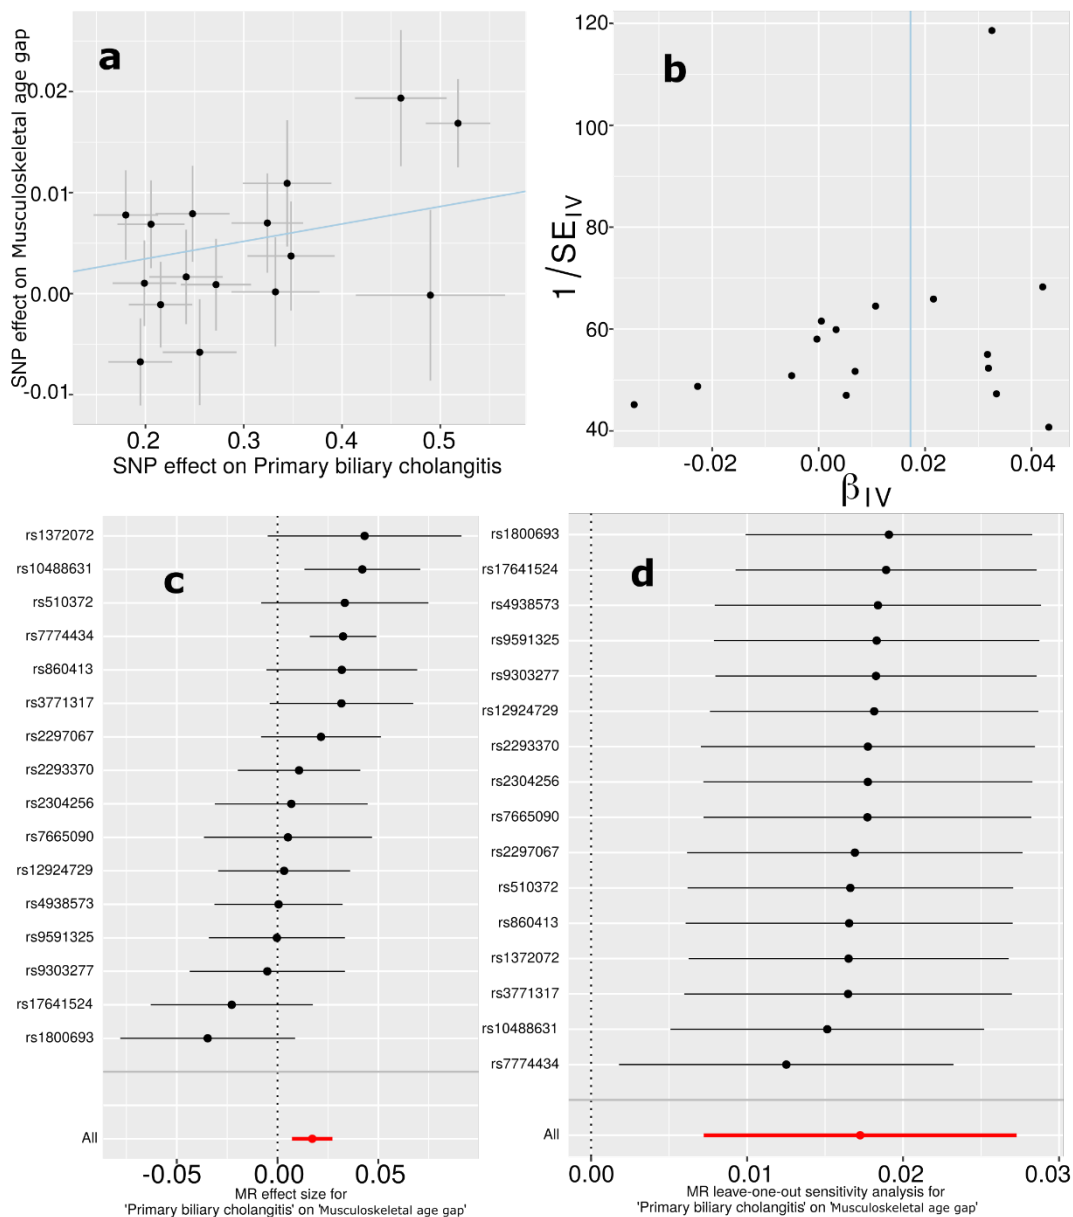

621 **a)** Scatter plot for the MR effect sizes of the exposure variable (PBC,  $x$ -axis, SD units) and the  
 622 outcome variable (musculoskeletal BAG,  $y$ -axis, log OR) with standard error bars. The slopes of  
 623 the regression line correspond to the causal effect sizes estimated by the IVW estimator. **b)**  
 624 Funnel plot for the relationship between the causal effect of the exposure variable on the  
 625 outcome variable. Each dot represents MR effect sizes estimated using each SNP as a separate  
 626 instrument against the inverse of the standard error of the causal estimate. The vertical red line  
 627 shows the MR estimates using all SNPs. **c)** Forest plot for the single-SNP MR results. Each line  
 628 represents the MR effect (log OR) for the exposure variable on the outcome variable using only  
 629 one SNP; the red line shows the MR effect using all SNPs together. **d)** Leave-one-out analysis of  
 630 the exposure variable on the outcome variable. Each row represents the MR effect (log OR) and  
 631

632 the 95% CI by excluding that SNP from the analysis. The red line depicts the IVW estimator  
633 using all SNPs.  
634

635 **eFigure 30: Mendelian randomization sensitivity check for weight on the musculoskeletal**  
 636 **BAG**

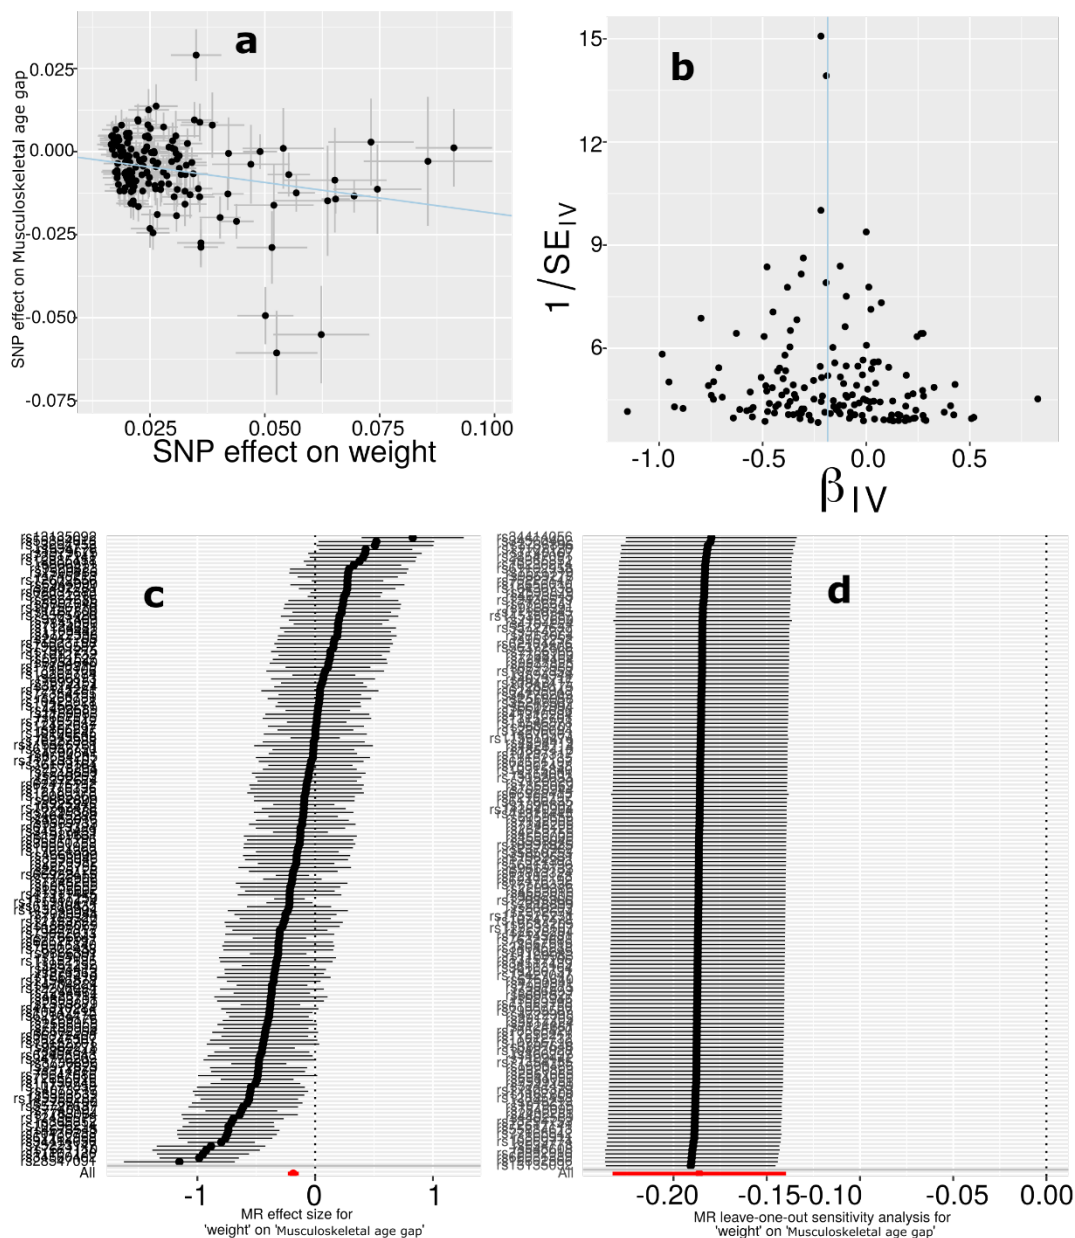

637  
 638 **a)** Scatter plot for the MR effect sizes of the exposure variable (body weight,  $x$ -axis, SD units)  
 639 and the outcome variable (musculoskeletal BAG,  $y$ -axis, log OR) with standard error bars. The  
 640 slopes of the regression line correspond to the causal effect sizes estimated by the IVW  
 641 estimator. **b)** Funnel plot for the relationship between the causal effect of the exposure variable  
 642 on the outcome variable. Each dot represents MR effect sizes estimated using each SNP as a  
 643 separate instrument against the inverse of the standard error of the causal estimate. The vertical  
 644 red line shows the MR estimates using all SNPs. **c)** Forest plot for the single-SNP MR results.  
 645 Each line represents the MR effect (log OR) for the exposure variable on the outcome variable  
 646 using only one SNP; the red line shows the MR effect using all SNPs together. **d)** Leave-one-out  
 647 analysis of the exposure variable on the outcome variable. Each row represents the MR effect

648 (log OR) and the 95% CI by excluding that SNP from the analysis. The red line depicts the IVW  
649 estimator using all SNPs.  
650

651 **eFigure 31: Mendelian randomization sensitivity check for weight on the pulmonary BAG**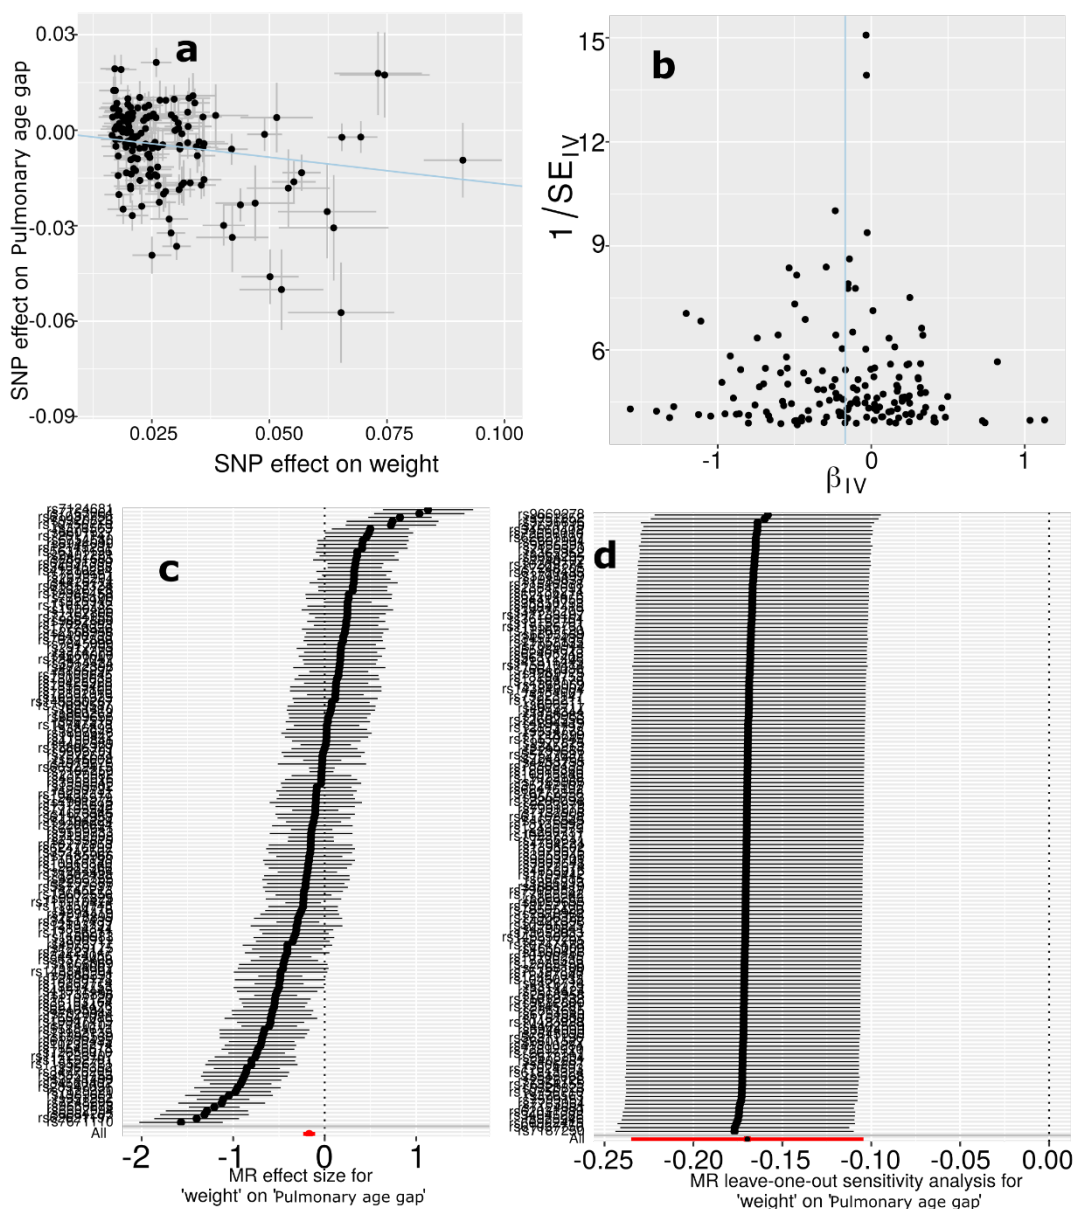

652  
 653 **a)** Scatter plot for the MR effect sizes of the exposure variable (body weight,  $x$ -axis, SD units)  
 654 and the outcome variable (pulmonary BAG,  $y$ -axis, log OR) with standard error bars. The slopes  
 655 of the regression line correspond to the causal effect sizes estimated by the IVW estimator. **b)**  
 656 Funnel plot for the relationship between the causal effect of the exposure variable on the  
 657 outcome variable. Each dot represents MR effect sizes estimated using each SNP as a separate  
 658 instrument against the inverse of the standard error of the causal estimate. The vertical red line  
 659 shows the MR estimates using all SNPs. **c)** Forest plot for the single-SNP MR results. Each line  
 660 represents the MR effect (log OR) for the exposure variable on the outcome variable using only  
 661 one SNP; the red line shows the MR effect using all SNPs together. **d)** Leave-one-out analysis of  
 662 the exposure variable on the outcome variable. Each row represents the MR effect (log OR) and  
 663 the 95% CI by excluding that SNP from the analysis. The red line depicts the IVW estimator  
 664 using all SNPs.

665 **eFigure 32: Mendelian randomization sensitivity check for AD on the renal BAG**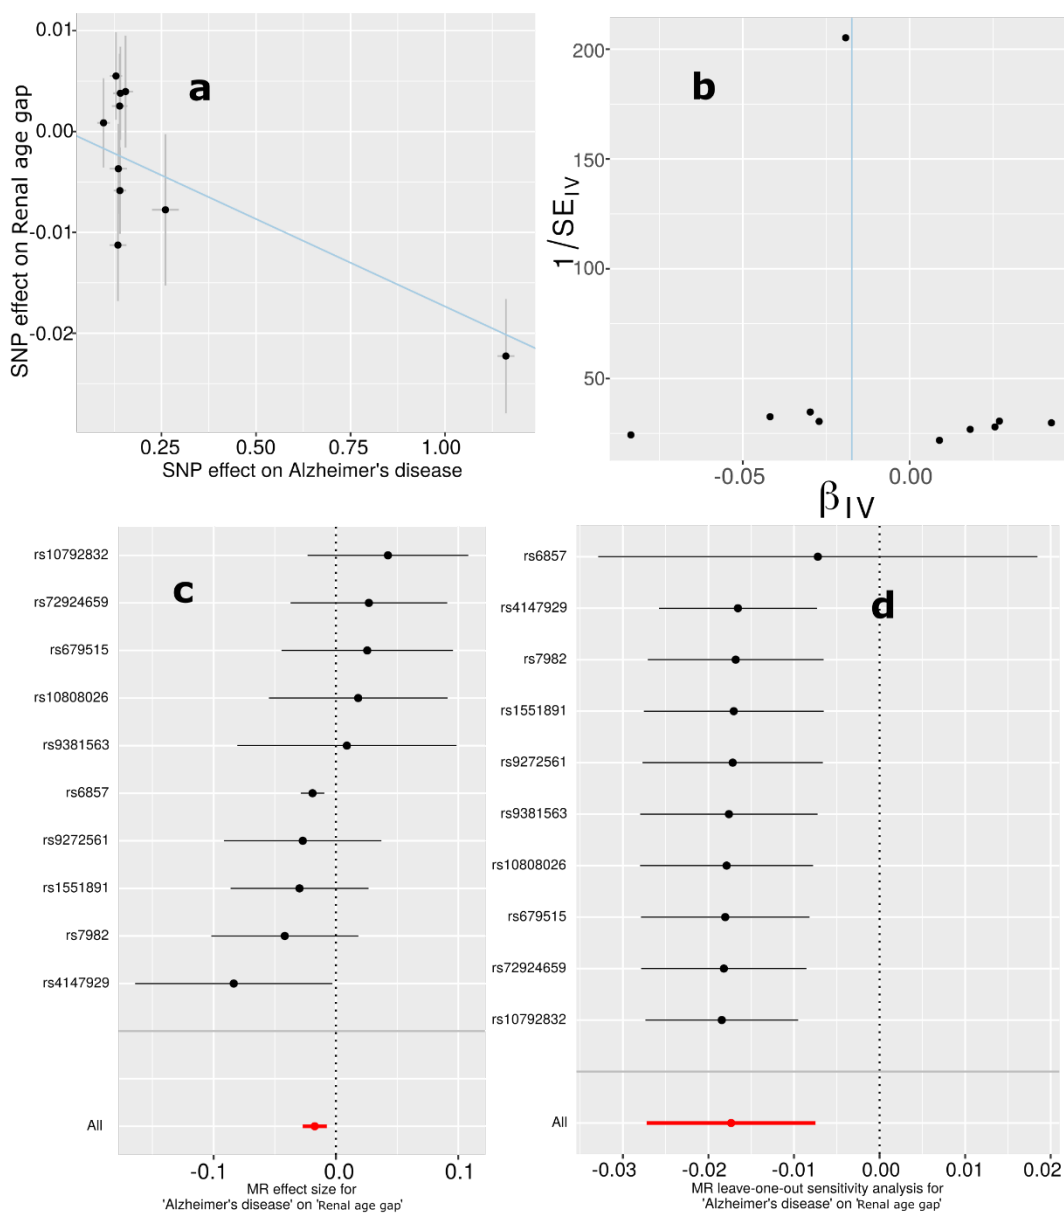

666  
 667 **a)** Scatter plot for the MR effect sizes of the exposure variable (AD,  $x$ -axis, SD units) and the  
 668 outcome variable (renal BAG,  $y$ -axis, log OR) with standard error bars. The slopes of the  
 669 regression line correspond to the causal effect sizes estimated by the IVW estimator. **b)** Funnel  
 670 plot for the relationship between the causal effect of the exposure variable on the outcome  
 671 variable. Each dot represents MR effect sizes estimated using each SNP as a separate instrument  
 672 against the inverse of the standard error of the causal estimate. The vertical red line shows the  
 673 MR estimates using all SNPs. **c)** Forest plot for the single-SNP MR results. Each line represents  
 674 the MR effect (log OR) for the exposure variable on the outcome variable using only one SNP;  
 675 the red line shows the MR effect using all SNPs together. **d)** Leave-one-out analysis of the  
 676 exposure variable on the outcome variable. Each row represents the MR effect (log OR) and the  
 677 95% CI by excluding that SNP from the analysis. The red line depicts the IVW estimator using  
 678 all SNPs.



679 **eFigure 33: Mendelian randomization sensitivity check for weight on the renal BAG**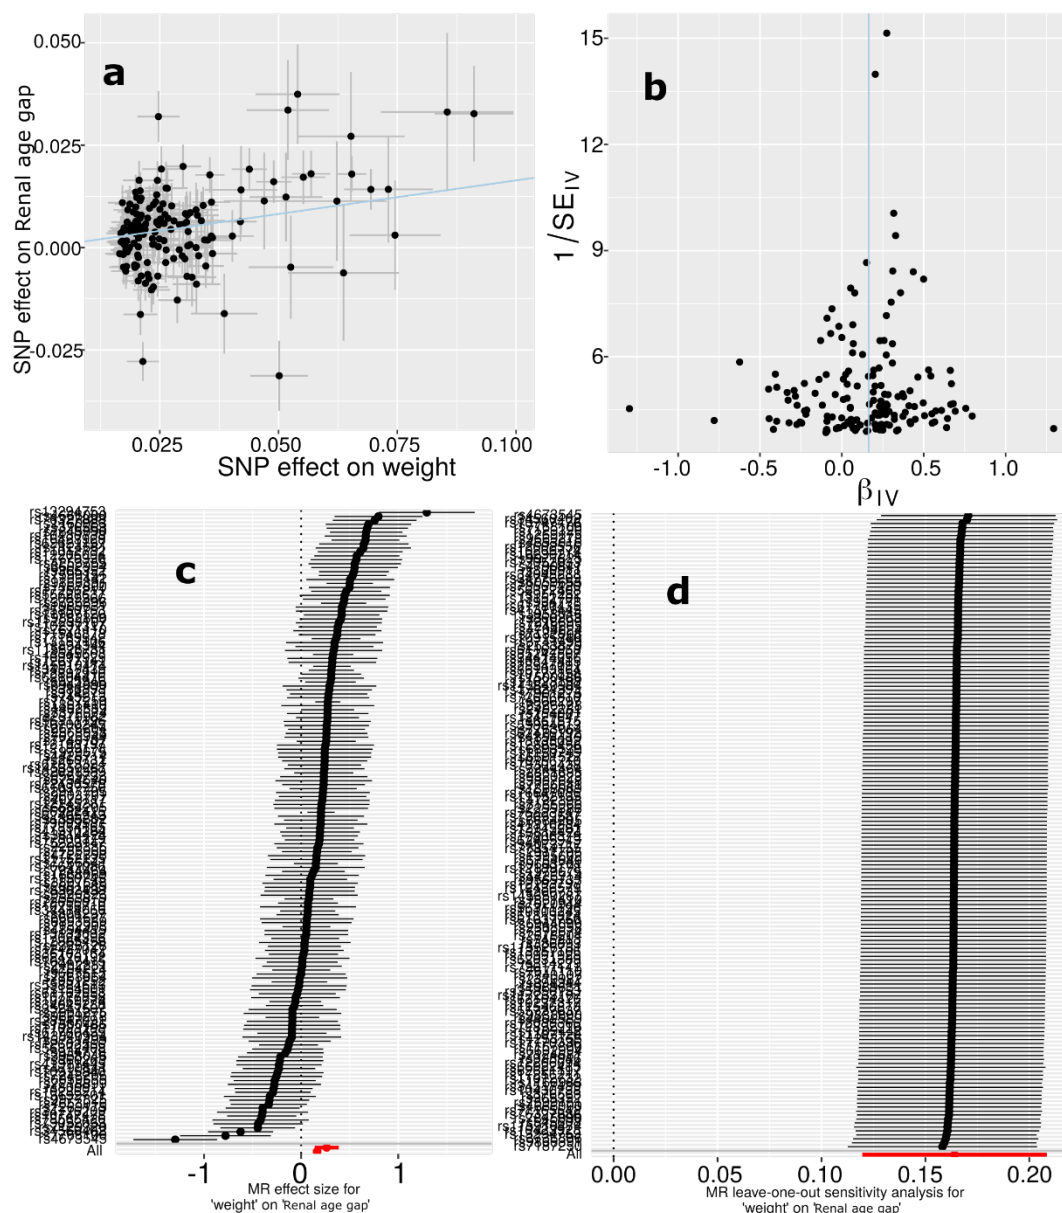

680  
 681 **a)** Scatter plot for the MR effect sizes of the exposure variable (body weight,  $x$ -axis, SD units)  
 682 and the outcome variable (renal BAG,  $y$ -axis, log OR) with standard error bars. The slopes of the  
 683 regression line correspond to the causal effect sizes estimated by the IVW estimator. **b)** Funnel  
 684 plot for the relationship between the causal effect of the exposure variable on the outcome  
 685 variable. Each dot represents MR effect sizes estimated using each SNP as a separate instrument  
 686 against the inverse of the standard error of the causal estimate. The vertical red line shows the  
 687 MR estimates using all SNPs. **c)** Forest plot for the single-SNP MR results. Each line represents  
 688 the MR effect (log OR) for the exposure variable on the outcome variable using only one SNP;  
 689 the red line shows the MR effect using all SNPs together. **d)** Leave-one-out analysis of the  
 690 exposure variable on the outcome variable. Each row represents the MR effect (log OR) and the  
 691 95% CI by excluding that SNP from the analysis. The red line depicts the IVW estimator using  
 692 all SNPs.

693 **eFigure 34: Mendelian randomization sensitivity check for the brain BAG on sleep**  
 694 **duration**

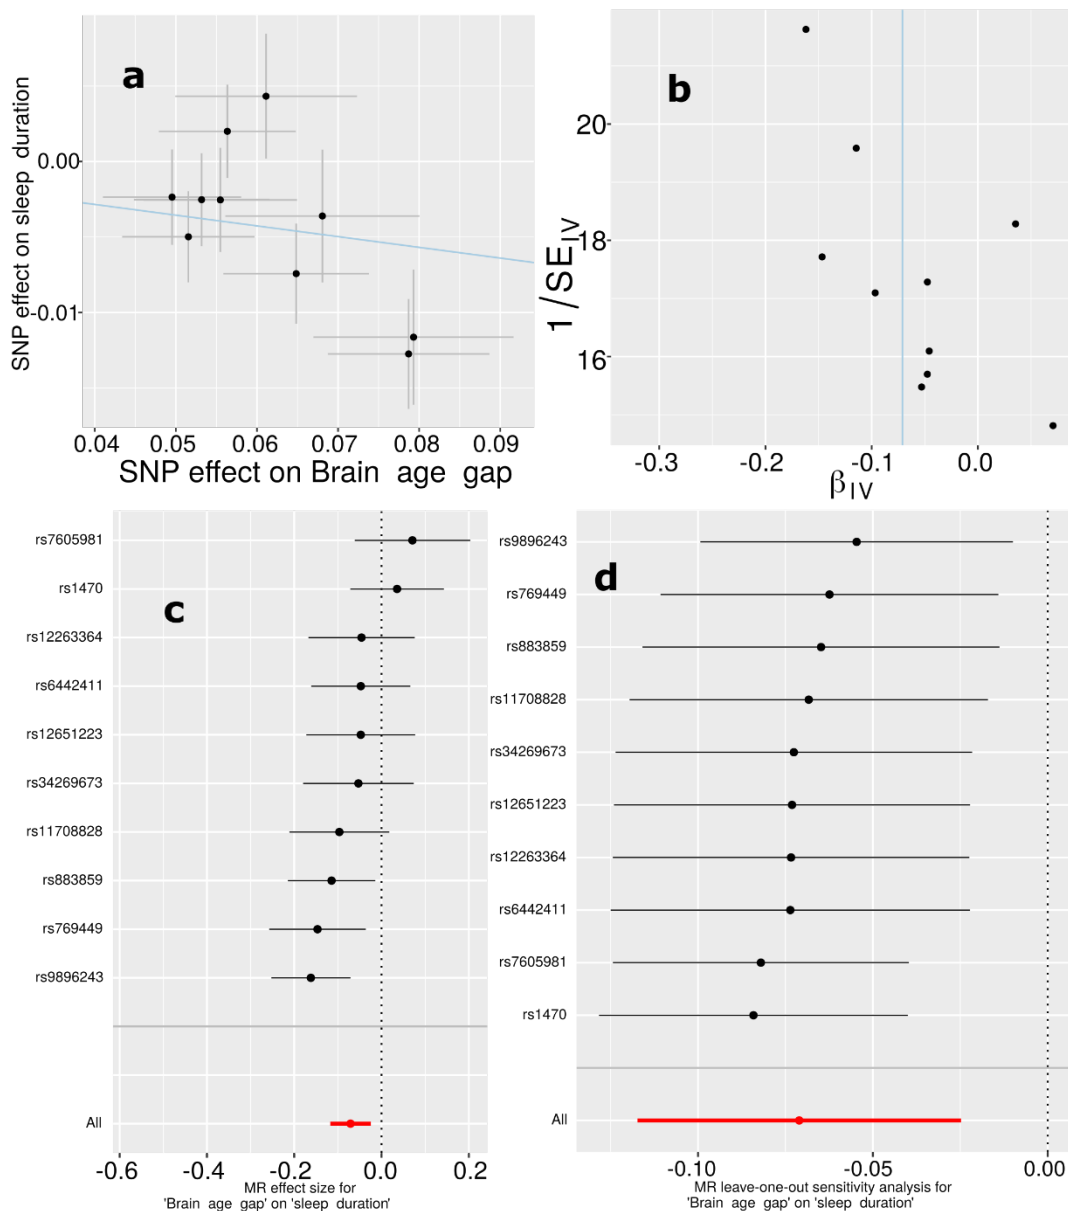

695  
 696 **a)** Scatter plot for the MR effect sizes of the exposure variable (brain BAG, x-axis, SD units) and  
 697 the outcome variable (sleep duration, y-axis, log OR) with standard error bars. The slopes of the  
 698 regression line correspond to the causal effect sizes estimated by the IVW estimator. **b)** Funnel  
 699 plot for the relationship between the causal effect of the exposure variable on the outcome  
 700 variable. Each dot represents MR effect sizes estimated using each SNP as a separate instrument  
 701 against the inverse of the standard error of the causal estimate. The vertical red line shows the  
 702 MR estimates using all SNPs. **c)** Forest plot for the single-SNP MR results. Each line represents  
 703 the MR effect (log OR) for the exposure variable on the outcome variable using only one SNP;  
 704 the red line shows the MR effect using all SNPs together. **d)** Leave-one-out analysis of the  
 705 exposure variable on the outcome variable. Each row represents the MR effect (log OR) and the

706 95% CI by excluding that SNP from the analysis. The red line depicts the IVW estimator using  
707 all SNPs.  
708

709 **eFigure 35: Mendelian randomization sensitivity check for the cardiovascular BAG on**  
 710 **triglycerides to lipids ratio in very large VLDL**

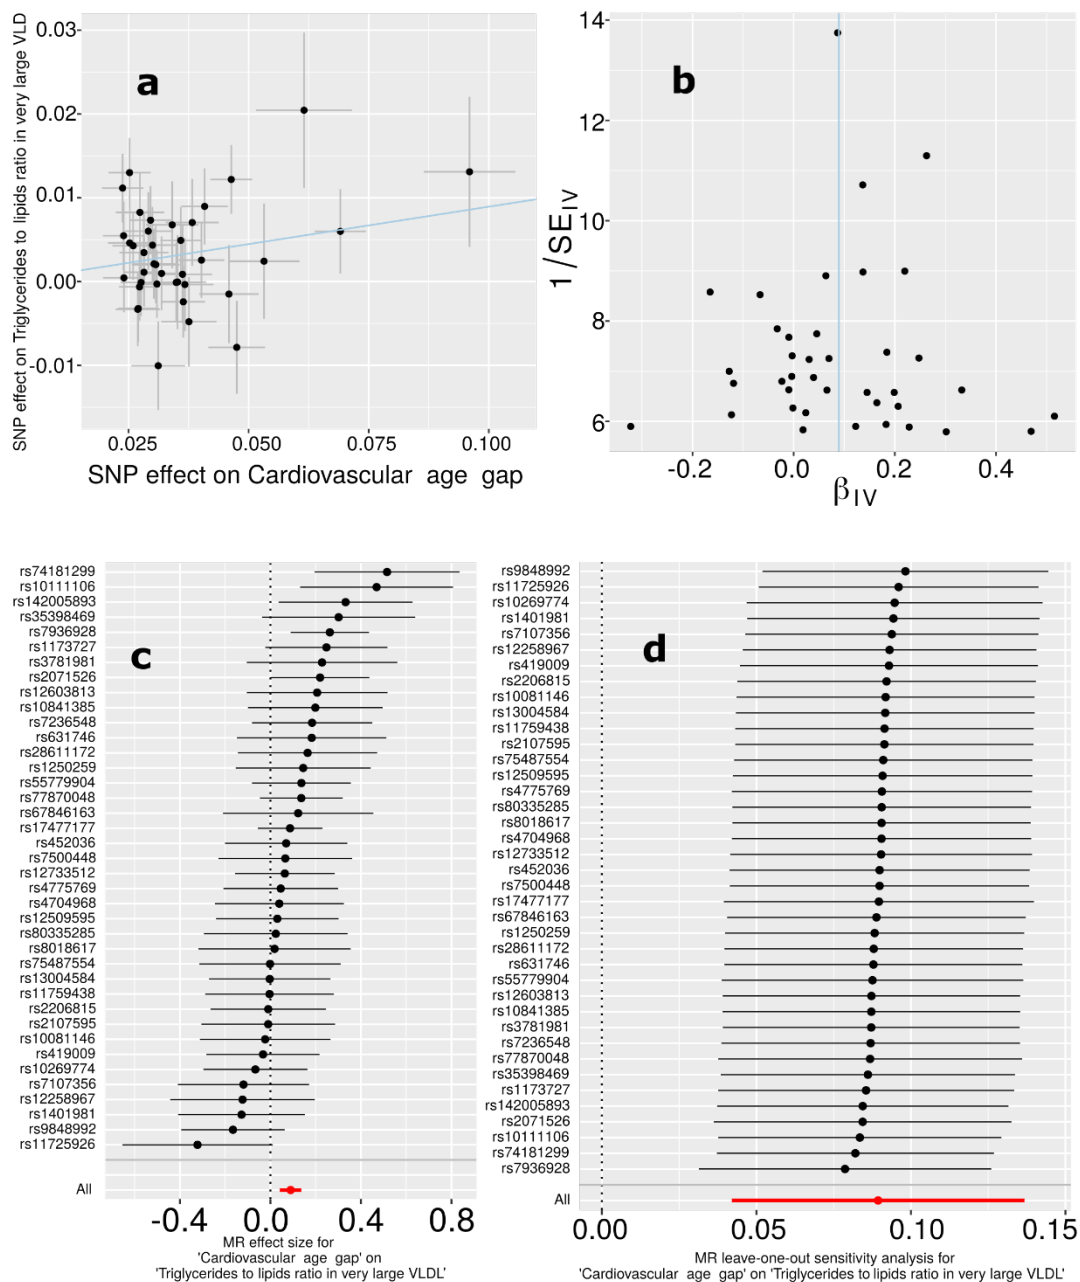

711 **a)** Scatter plot for the MR effect sizes of the exposure variable (cardiovascular BAG,  $x$ -axis, SD  
 712 units) and the outcome variable (triglycerides to lipids ratio in very large VLDL,  $y$ -axis, log OR)  
 713 with standard error bars. The slopes of the regression line correspond to the causal effect sizes  
 714 estimated by the IVW estimator. **b)** Funnel plot for the relationship between the causal effect of  
 715 the exposure variable on the outcome variable. Each dot represents MR effect sizes estimated  
 716 using each SNP as a separate instrument against the inverse of the standard error of the causal  
 717 estimate. The vertical red line shows the MR estimates using all SNPs. **c)** Forest plot for the  
 718 single-SNP MR results. Each line represents the MR effect (log OR) for the exposure variable on  
 719 the outcome variable using only one SNP; the red line shows the MR effect using all SNPs  
 720

721 together. **d)** Leave-one-out analysis of the exposure variable on the outcome variable. Each row  
722 represents the MR effect (log OR) and the 95% CI by excluding that SNP from the analysis. The  
723 red line depicts the IVW estimator using all SNPs.  
724

725 **eFigure 36: Mendelian randomization sensitivity check for the metabolic BAG on weight**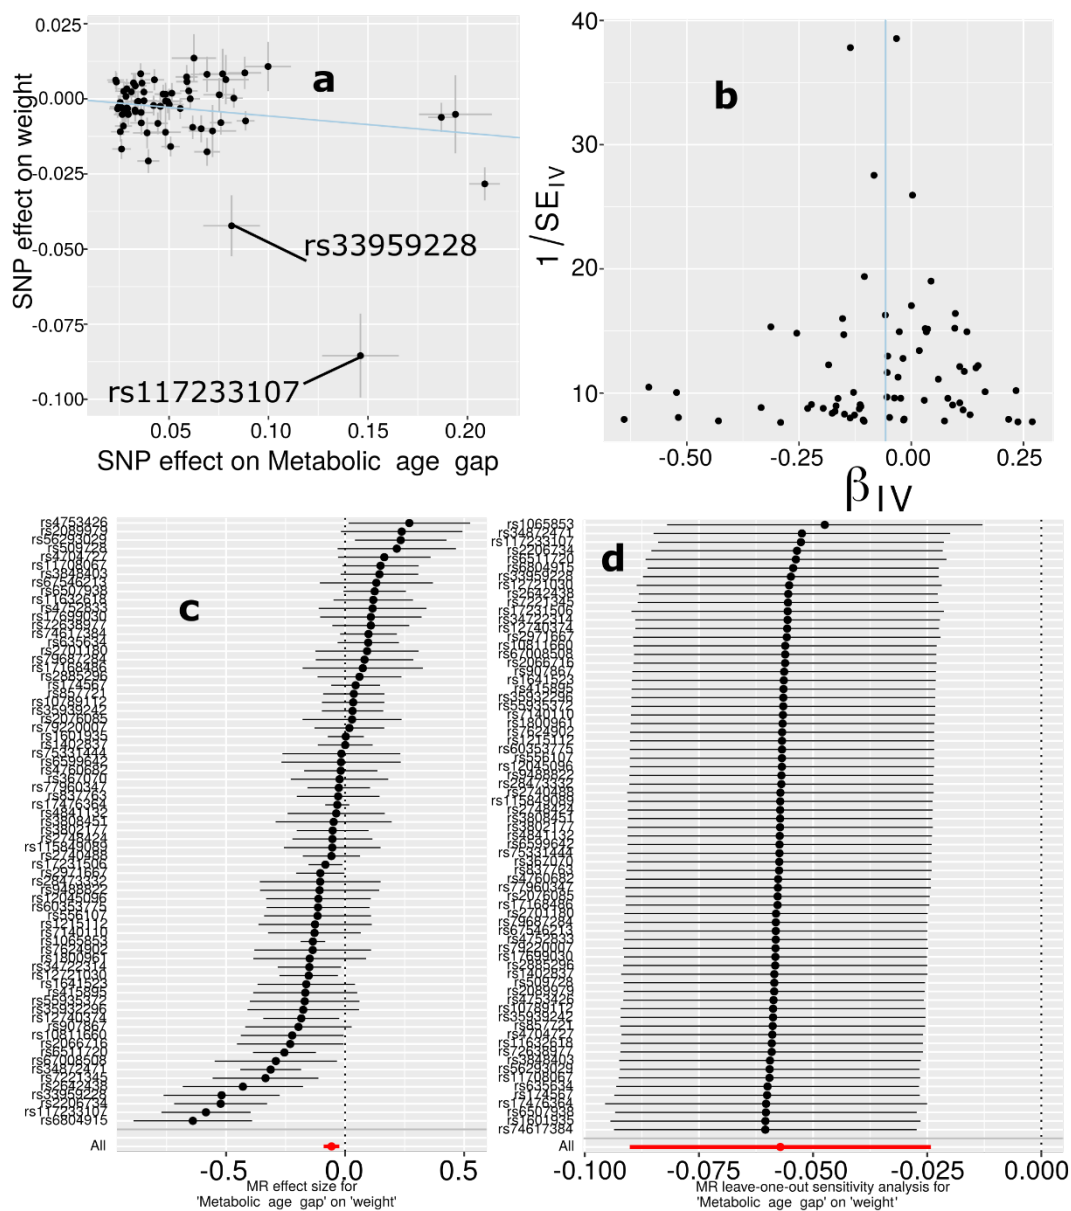

726  
 727 **a)** Scatter plot for the MR effect sizes of the exposure variable (metabolic BAG, x-axis, SD  
 728 units) and the outcome variable (body weight, y-axis, log OR) with standard error bars. The  
 729 slopes of the regression line correspond to the causal effect sizes estimated by the IVW  
 730 estimator. **b)** Funnel plot for the relationship between the causal effect of the exposure variable  
 731 on the outcome variable. Each dot represents MR effect sizes estimated using each SNP as a  
 732 separate instrument against the inverse of the standard error of the causal estimate. The vertical  
 733 red line shows the MR estimates using all SNPs. **c)** Forest plot for the single-SNP MR results.  
 734 Each line represents the MR effect (log OR) for the exposure variable on the outcome variable  
 735 using only one SNP; the red line shows the MR effect using all SNPs together. **d)** Leave-one-out  
 736 analysis of the exposure variable on the outcome variable. Each row represents the MR effect  
 737 (log OR) and the 95% CI by excluding that SNP from the analysis. The red line depicts the IVW  
 738 estimator using all SNPs.

739 **eFigure 37: Mendelian randomization sensitivity check for the pulmonary BAG on weight**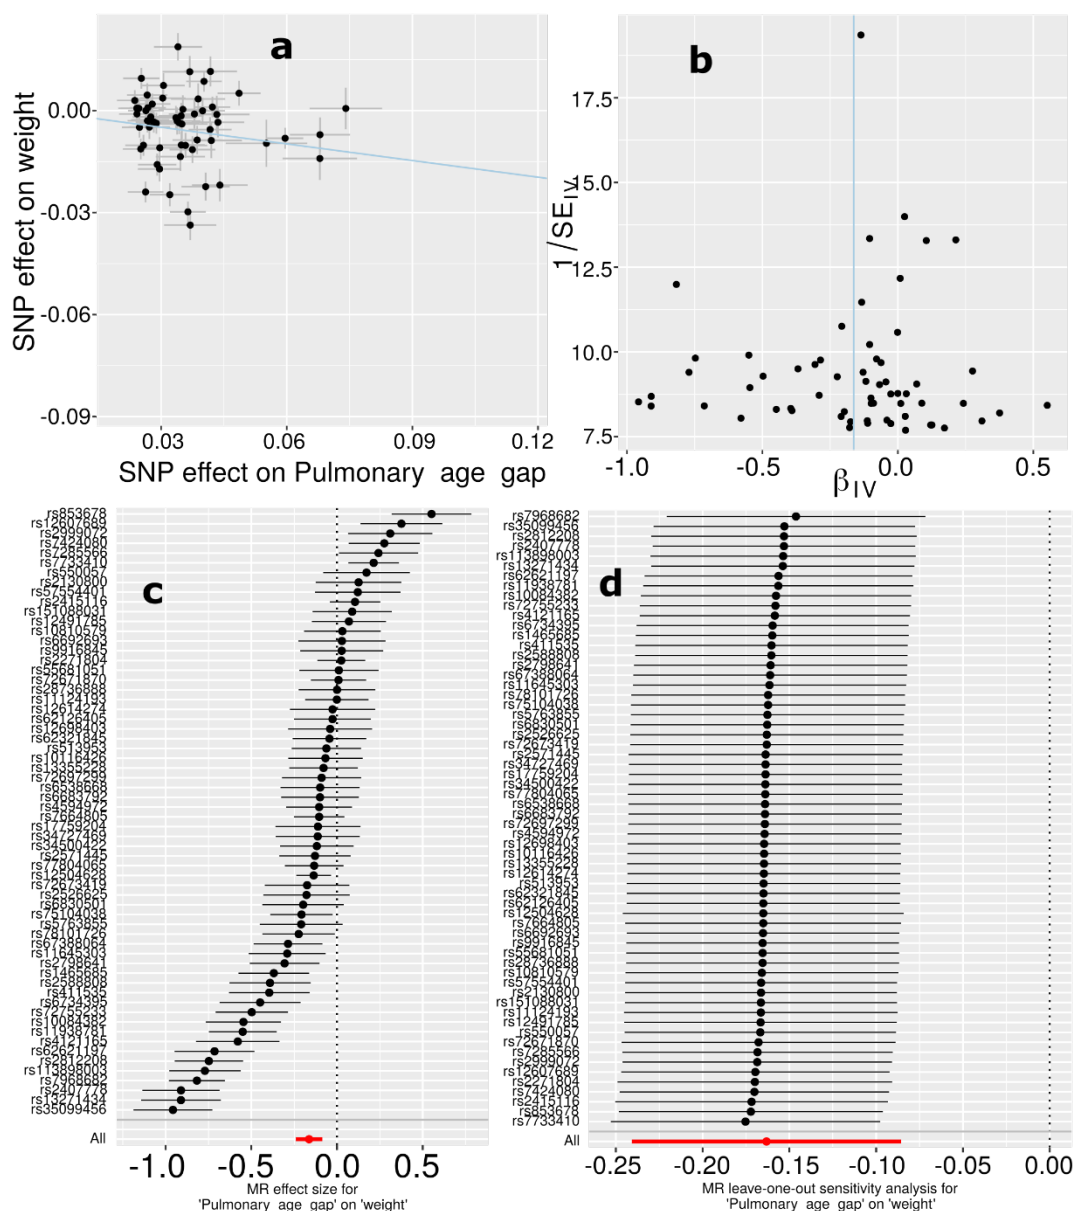

740  
 741 **a)** Scatter plot for the MR effect sizes of the exposure variable (pulmonary BAG, x-axis, SD  
 742 units) and the outcome variable (body weight, y-axis, log OR) with standard error bars. The  
 743 slopes of the regression line correspond to the causal effect sizes estimated by the IVW  
 744 estimator. **b)** Funnel plot for the relationship between the causal effect of the exposure variable  
 745 on the outcome variable. Each dot represents MR effect sizes estimated using each SNP as a  
 746 separate instrument against the inverse of the standard error of the causal estimate. The vertical  
 747 red line shows the MR estimates using all SNPs. **c)** Forest plot for the single-SNP MR results.  
 748 Each line represents the MR effect (log OR) for the exposure variable on the outcome variable  
 749 using only one SNP; the red line shows the MR effect using all SNPs together. **d)** Leave-one-out  
 750 analysis of the exposure variable on the outcome variable. Each row represents the MR effect  
 751 (log OR) and the 95% CI by excluding that SNP from the analysis. The red line depicts the IVW  
 752 estimator using all SNPs.

753 **eFigure 38: Causal multi-organ network between the nine biological age gaps and 17**  
 754 **clinical traits of chronic diseases, lifestyle factors, and cognition**

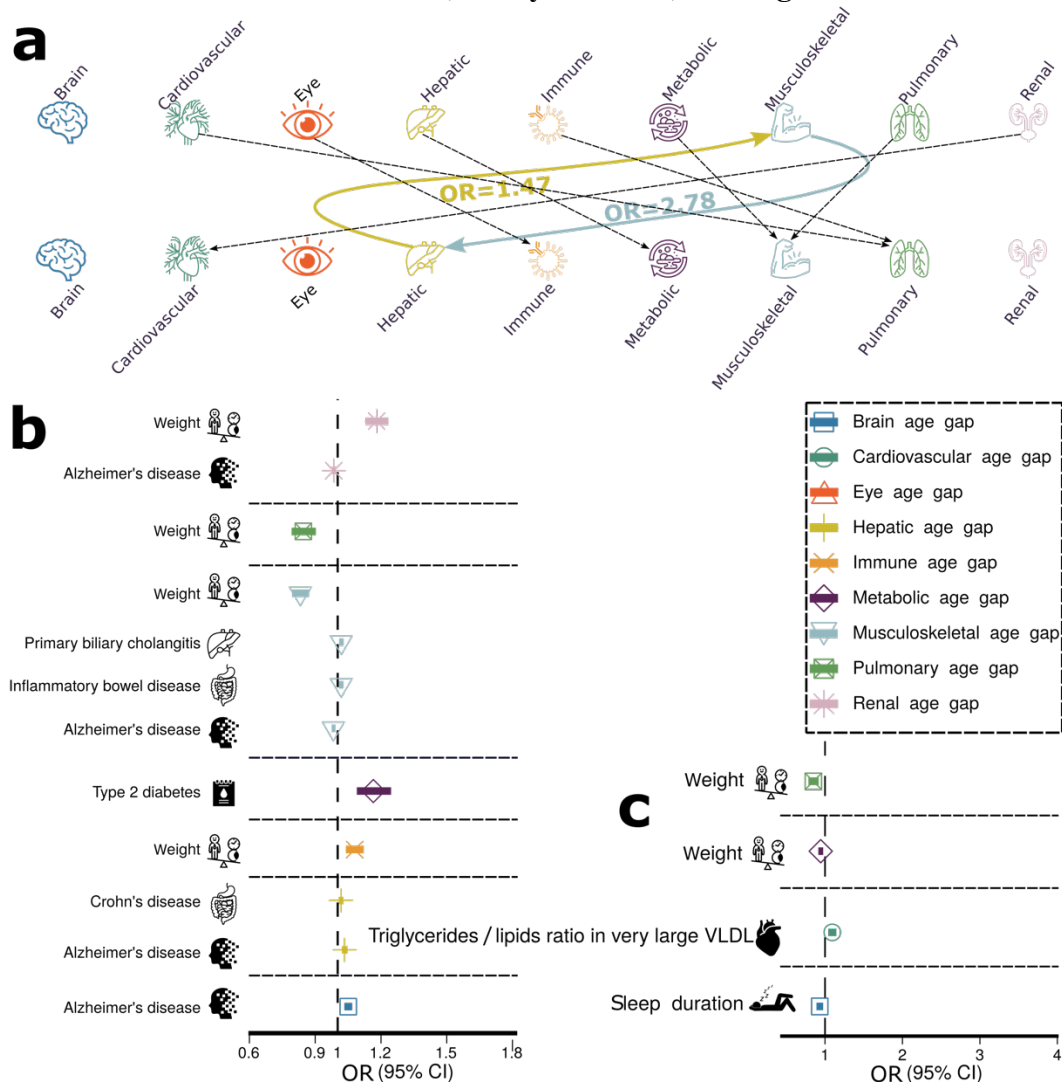

755 **a)** Causal inference between each pair of BAGs using bi-directional two-sample Mendelian  
 756 randomization by excluding overlapping populations. The colored lines represent causal effects  
 757 that survived the correction for multiple comparisons using the Bonferroni method; the dotted  
 758 lines denote the nominal significant causal effects ( $P$ -value  $< 0.05$ ). **b)** The forward Mendelian  
 760 randomization investigates the causal inference of 17 unbiasedly selected exposure variables on  
 761 the nine outcome variables (i.e., the nine BAGs). **c)** The inverse Mendelian randomization  
 762 examines the causal inference of the 9 BAGs on the 17 clinical traits. We present the tests  
 763 passing the statistical significance after adjusting for multiple comparisons using the Bonferroni  
 764 correction. The OR and the 95% confidence interval are presented. Abbreviation: VLDL: very  
 765 low-density lipoprotein; CI: confidence interval; OR: odds ratio.  
 766



767 **eTable 1: Heritability estimates using the GCTA software**768 **A) Original sample sizes.** Original sample sizes were used to estimate the heritability for  
769 the nine organ systems.

| BAG             | $h^2$ | $h^2$ SE | P-value              | $N$     |
|-----------------|-------|----------|----------------------|---------|
| Brain           | 0.47  | 0.02     | $<1 \times 10^{-10}$ | 30,108  |
| Cardiovascular  | 0.27  | 0.006    | $<1 \times 10^{-10}$ | 111,543 |
| Eye             | 0.38  | 0.02     | $<1 \times 10^{-10}$ | 36,004  |
| Hepatic         | 0.23  | 0.006    | $<1 \times 10^{-10}$ | 111,543 |
| Immune          | 0.20  | 0.004    | $<1 \times 10^{-10}$ | 111,543 |
| Metabolic       | 0.29  | 0.006    | $<1 \times 10^{-10}$ | 111,543 |
| Musculoskeletal | 0.24  | 0.004    | $<1 \times 10^{-10}$ | 111,543 |
| Pulmonary       | 0.36  | 0.006    | $<1 \times 10^{-10}$ | 111,543 |
| Renal           | 0.30  | 0.006    | $<1 \times 10^{-10}$ | 111,543 |

770

771 **B) Down-sampled sample sizes.** For the eight BAGs except for the brain BAG, we  
772 randomly down-sampled the original sample sizes to that of the brain BAG.

| BAG             | $h^2$ | $h^2$ SE | P-value              | $N$    |
|-----------------|-------|----------|----------------------|--------|
| Brain           | 0.47  | 0.02     | $<1 \times 10^{-10}$ | 30,108 |
| Cardiovascular  | 0.35  | 0.07     | $<1 \times 10^{-5}$  | 30,108 |
| Eye             | 0.42  | 0.02     | $<1 \times 10^{-5}$  | 30,108 |
| Hepatic         | 0.18  | 0.07     | $<1 \times 10^{-5}$  | 30,108 |
| Immune          | 0.19  | 0.07     | $<1 \times 10^{-5}$  | 30,108 |
| Metabolic       | 0.16  | 0.07     | $<1 \times 10^{-5}$  | 30,108 |
| Musculoskeletal | 0.21  | 0.07     | $<1 \times 10^{-5}$  | 30,108 |
| Pulmonary       | 0.39  | 0.07     | $<1 \times 10^{-5}$  | 30,108 |
| Renal           | 0.28  | 0.07     | $<1 \times 10^{-5}$  | 30,108 |

773

774 **C) Brain imaging-derived phenotypes vs. 4 pulmonary features.** For the brain imaging  
775 phenotypes, we used four sets of features from our previous studies: *i*) 32 pattern of  
776 structural coavairance (PSCs) from the data-driven MuSIC atlas using T1-weighted MRI  
777 and orthogonal-projective non-negative matrix factorization<sup>3</sup>; *ii*) 101 GM ROIs using the  
778 ANTs (<https://stnava.github.io/ANTs/>) software<sup>4</sup>; *iii*) the 21 WM tracts for fractional  
779 anisotropy (FA) mean values<sup>5</sup>; and *iv*) 21 funtional node (FN) measures from resting-  
780 state functional MRI<sup>6</sup>. The 4 pulmonary features included forced vital capacity, forced  
781 expiratory volume, peak expiratory flow, and the ratio of forced expiratory volume to  
782 forced vital capacity. For comparison purposes, we also show the  $h^2$  estimates for the  
783 brain and pulmonary BAGs. The detailed results for all estimates are presented in  
784 **Supplementary eFile 22**. The distribution of each phenotype group is shown in the  
785 figure below.

| Organ | Phenotype group | Phenotype (mean or individual) | $h^2$ | $h^2$ SE | P-value              |
|-------|-----------------|--------------------------------|-------|----------|----------------------|
| Brain | Brain feature   | MuSIC <sup>3</sup>             | 0.45  | 0.16     | $<1 \times 10^{-20}$ |
|       |                 | GM-IDP <sup>4</sup>            | 0.39  | 0.16     | $<1 \times 10^{-20}$ |
|       |                 | WM-IDP <sup>5</sup>            | 0.53  | 0.08     | $<1 \times 10^{-20}$ |

|           |               |                     |      |       |                    |
|-----------|---------------|---------------------|------|-------|--------------------|
|           |               | FN-IDP <sup>6</sup> | 0.29 | 0.06  | <1E <sup>-20</sup> |
|           | Brain BAG     | Brain BAG           | 0.47 | 0.02  | <1E <sup>-20</sup> |
| Pulmonary | feature       | FVC                 | 0.34 | 0.007 | <1E <sup>-20</sup> |
|           |               | FEV/FVC             | 0.41 | 0.007 | <1E <sup>-20</sup> |
|           |               | PEF                 | 0.28 | 0.007 | <1E <sup>-20</sup> |
|           |               | FEV                 | 0.35 | 0.007 | <1E <sup>-20</sup> |
|           | Pulmonary BAG | Pulmonary BAG       | 0.36 | 0.006 | <1E <sup>-20</sup> |

786

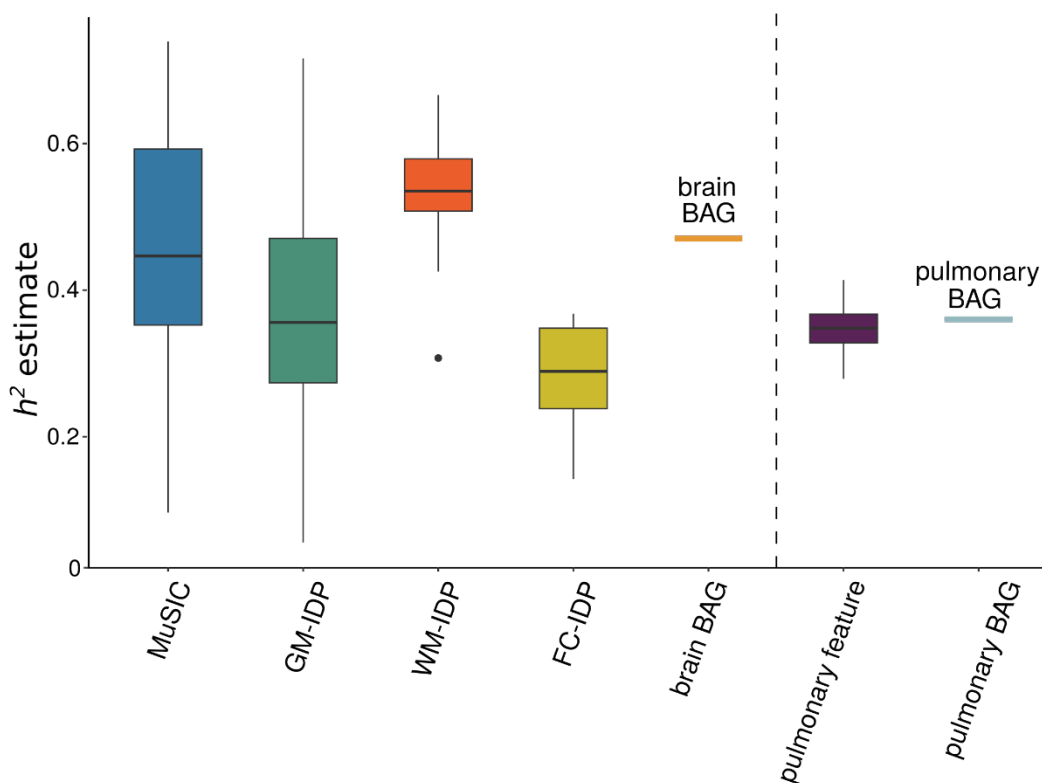

787

788 **Figure.** We compared  $h^2$  estimates using GCTA between brain features and the brain BAG in  
789 contrast to pulmonary features and the pulmonary BAG. In general, our observations indicated  
790 that the brain BAG ( $0.47 \pm 0.02$ ) exhibits a higher degree of heritability than the pulmonary BAG  
791 ( $0.36 \pm 0.06$ ), and this pattern aligns with the heritability of the underlying features employed in  
792 their computation: Brain feature:  $h^2=0.42$  across the four sets of brain features vs. pulmonary  
793 feature:  $h^2=0.34$  across the four pulmonary features.

794

795 **eTable 2: The beta coefficient and its SE estimate from the full sample vs. the down-**  
 796 **sampled brain BAG comparable sample**

797 N\_ISS: number of independent significant SNPs

| BAG             | Mean_beta_down<br>sample | Mean_beta_full<br>sample | SE_beta_down<br>sample | SE_beta_fulls<br>ample | t_beta           | p_beta       | t_se         | p_se                       | N_ISS |
|-----------------|--------------------------|--------------------------|------------------------|------------------------|------------------|--------------|--------------|----------------------------|-------|
| Cardiovascular  | 0.034802                 | 0.035822                 | 0.010533               | 0.005457               | -<br>0.513<br>17 | 0.608<br>293 | 14.08<br>46  | <b>1.95E</b><br><b>-33</b> | 124   |
| Eye             | 0.06527                  | 0.064561                 | 0.009967               | 0.009128               | 0.136<br>138     | 0.891<br>913 | 1.828<br>485 | <b>0.069</b><br><b>668</b> | 69    |
| Hepatic         | 0.058408                 | 0.057479                 | 0.014495               | 0.007525               | 0.293<br>471     | 0.769<br>268 | 13.28<br>265 | <b>2.59E</b><br><b>-35</b> | 289   |
| Immune          | 0.043347                 | 0.041526                 | 0.011454               | 0.005948               | 0.682<br>463     | 0.495<br>312 | 12.78<br>407 | <b>5.79E</b><br><b>-32</b> | 217   |
| Metabolic       | 0.053834                 | 0.052587                 | 0.013227               | 0.006842               | 0.490<br>113     | 0.624<br>182 | 15.99<br>737 | <b>1.7E-</b><br><b>50</b>  | 422   |
| Musculoskeletal | 0.04263                  | 0.041015                 | 0.011109               | 0.005817               | 0.520<br>949     | 0.602<br>797 | 11.23<br>119 | <b>1.44E</b><br><b>-24</b> | 147   |
| Pulmonary       | 0.035423                 | 0.036056                 | 0.010959               | 0.005678               | -<br>0.536<br>29 | 0.591<br>975 | 20.08<br>143 | <b>1.81E</b><br><b>-67</b> | 272   |
| Renal           | 0.067828                 | 0.068927                 | 0.014536               | 0.007595               | -<br>0.233<br>5  | 0.815<br>446 | 12.87<br>744 | <b>5.18E</b><br><b>-34</b> | 331   |

798

799 **eTable 3: Genetic correlation analyses between the pulmonary BAG and the four features**  
 800 **used to derive the BAG.**  
 801

| BAG               | Pulmonary feature                               | $g_c$ mean | $g_c$ std | P                    |
|-------------------|-------------------------------------------------|------------|-----------|----------------------|
| Pulmonary_age_gap | forced_vital_capacity_fvc_zscore                | 0.6409     | 0.0195    | 6.1E <sup>-237</sup> |
|                   | fev1_fvc_ratio_zscore                           | 0.5371     | 0.0316    | 6.47E <sup>-65</sup> |
|                   | peak_expiratory_flow_pef                        | -0.7903    | 0.0175    | <1E <sup>-300</sup>  |
|                   | forced_expiratory_volume_in_1second_fev1_zscore | 0.8259     | 0.0111    | <1E <sup>-300</sup>  |

802

803 **eTable 4: Selected 41 clinical traits for genetic correlation analyses.** We selected the candidate  
804 studies from the GWAS Catalog for 41 clinical traits, including chronic diseases affecting multiple  
805 organ systems, education, and intelligence. To ensure the suitability of the GWAS summary  
806 statistics, we first checked that the selected study's population was European ancestry; we then  
807 guaranteed a moderate SNP-based heritability  $h^2$  estimate and excluded the studies with spurious  
808 low  $h^2$  ( $<0.05$ ). Abbreviations are detailed in the main text.  
809

| Primary organ system | Trait          | PubMed ID | Sample size |
|----------------------|----------------|-----------|-------------|
| Brain                | AD             | 30820047  | 63,926      |
|                      | Smile-GAN-AD1  | NA        | 33,540      |
|                      | SmileGAN-AD2   | NA        | 33,540      |
|                      | SmileGAN-AD3   | NA        | 33,540      |
|                      | SmileGAN-AD4   | NA        | 33,540      |
|                      | SurrealGAN-AD1 | NA        | 33,540      |
|                      | SurrealGAN-AD2 | NA        | 33,540      |
|                      | ADHD           | 30478444  | 53,293      |
|                      | ALS            | 27455348  | 36052       |
|                      | ASD            | 30804558  | 46,350      |
|                      | HYDRA-ASD1     | 37017948  | 14,786      |
|                      | HYDRA-ASD2     | 37017948  | 14,786      |
|                      | HYDRA-ASD3     | 37017948  | 14,786      |
|                      | BIP            | 31043756  | 51,710      |
|                      | MDD            | 22472876  | 18,759      |
|                      | HYDRA-MDD1     | NA        | 33,540      |
|                      | HYDRA-MDD2     | NA        | 33,540      |
|                      | SCZ            | 23974872  | 11,244      |
|                      | HYDRA-SCZ1     | 32103250  | 14,786      |
|                      | HYDRA-SCZ2     | 32103250  | 14,786      |
| OCD                  | 28761083       | 9,725     |             |
| Cardiovascular       | WMH            | 31551276  | 11,226      |
|                      | AF             | 30061737  | 1030,836    |
|                      | Stroke         | 29531354  | 446,696     |
| Eye                  | Glaucoma       | 33627673  | 330,905     |
| Hepatic              | Liver fat      | 34128465  | 32,858      |
|                      | PBC            | 34033851  | 24,510      |
| Immune               | SLE            | 26502338  | 14,267      |
|                      | HIV            | 34737426  | 208,808     |
| Metabolic            | DB             | 30054458  | 655,666     |
|                      | Hyperlipidemia | 34906840  | 349,222     |
| Musculoskeletal      | RA             | 36333501  | 92,044      |
| Pulmonary            | Lung carcinoma | 28604730  | 85,716      |
| Renal                | CKD            | 31152163  | 625,219     |
| Digestive            | CD             | 26192919  | 20,883      |
|                      | IBD            | 26192919  | 34652       |
| Breast               | Breast cancer  | 29059683  | 139,274     |

|           |               |          |         |
|-----------|---------------|----------|---------|
|           | Education     | 23722424 | 126,559 |
| Cognition | Reaction time | 29844566 | 330,069 |
|           | Intelligence  | 28530673 | 78,308  |
| Lifestyle | Computer use  | 32317632 | 408,815 |

810

811

812 **eTable 5: Genetic correlations analyses between the nine BAGs and longevity, household**  
 813 **income, and telomere length.** We downloaded the GWAS summary statistics from Deelen et al.<sup>7</sup>,  
 814 which performed two GWASs on longevity based on the 90<sup>th</sup> survival percentile. For the household  
 815 income GWAS, we downloaded from Hill et al.<sup>8</sup>. For the telomere length, we used GWAS  
 816 summary statistics from Codd et al.<sup>9</sup>.  
 817

| BAG                     | Trait            | $g_c$ mean | $g_c$ std | P                   | PubMed ID | Sample size |
|-------------------------|------------------|------------|-----------|---------------------|-----------|-------------|
| Brain_age_gap           |                  | gc mean    | gc_std    | 0.0931              |           |             |
| Cardiovascular_age_gap  |                  | -0.1588    | 0.0946    | 0.0049              |           |             |
| Eye_age_gap             |                  | -0.2038    | 0.0725    | 0.0719              |           |             |
| Hepatic_age_gap         |                  | -0.1657    | 0.0921    | 0.6182              |           |             |
| Immune_age_gap          | Longevity        | 0.0495     | 0.0993    | 0.9299              | 31413236  | 36,745      |
| Metabolic_age_gap       |                  | 0.0086     | 0.0979    | 0.7605              |           |             |
| Musculoskeletal_age_gap |                  | 0.0328     | 0.1074    | 0.1128              |           |             |
| Pulmonary_age_gap       |                  | -0.1193    | 0.0752    | 0.0057              |           |             |
| Renal_age_gap           |                  | -0.197     | 0.0713    | 0.0323              |           |             |
| Brain_age_gap           |                  | -0.2089    | 0.0403    | 2.2E <sup>-07</sup> |           |             |
| Cardiovascular_age_gap  |                  | -0.0679    | 0.0356    | 0.0563              |           |             |
| Eye_age_gap             |                  | -0.066     | 0.0404    | 0.1024              |           |             |
| Hepatic_age_gap         | Household income | -0.1026    | 0.0417    | 0.0138              | 31874048  | 286,301     |
| Immune_age_gap          |                  | 0.0028     | 0.0414    | 0.9464              |           |             |
| Metabolic_age_gap       |                  | -0.0671    | 0.0389    | 0.0841              |           |             |
| Musculoskeletal_age_gap |                  | -0.2867    | 0.0308    | 1.4E <sup>-20</sup> |           |             |
| Pulmonary_age_gap       |                  | -0.1567    | 0.0286    | 4.4E <sup>-08</sup> |           |             |
| Renal_age_gap           |                  | -0.0989    | 0.0321    | 0.002               |           |             |
| Brain_age_gap           |                  | 0.0273     | 0.0506    | 0.5897              |           |             |
| Cardiovascular_age_gap  |                  | -0.0005    | 0.0038    | 0.9897              |           |             |
| Eye_age_gap             |                  | -0.0124    | 0.0439    | 0.7769              |           |             |
| Hepatic_age_gap         |                  | -0.0042    | 0.0306    | 0.9089              |           |             |
| Immune_age_gap          | Telomere length  | -0.1338    | 0.0377    | 0.0004              | 34611362  | 472,174     |
| Metabolic_age_gap       |                  | -0.0514    | 0.0393    | 0.1905              |           |             |
| Musculoskeletal_age_gap |                  | 0.0045     | 0.0333    | 0.8932              |           |             |
| Pulmonary_age_gap       |                  | -0.0993    | 0.0331    | 0.0027              |           |             |
| Renal_age_gap           |                  | -0.029     | 0.0293    | 0.3222              |           |             |

818

819 **eTable 6: Causal analysis using the LCV method.** We performed causal analysis using the LCV  
 820 method for the bi-directional causality between hepatic and musculoskeletal BAGs, the 9 BAGs  
 821 and longevity, and the 9 BAGs and telomere length. GCP: genetic causality proportion.  
 822

| Trait1                  | Trait2                                  | GCP      | GCP_se   | P               | PubMed ID | Sample size |
|-------------------------|-----------------------------------------|----------|----------|-----------------|-----------|-------------|
| Musculoskeletal age gap | Hepatic_age_gap                         | -0.75144 | 0.143475 | 9.37E-12        | NA        | 111,543     |
| Brain_age_gap           | Longevity (99 <sup>th</sup> percentile) | -0.45597 | 0.208644 | <b>0.047488</b> | 31874048  | 286,301     |
| Cardiovascular_age_gap  |                                         | -0.21694 | 0.395088 | 0.547241        |           |             |
| Eye_age_gap             |                                         | -0.07761 | 0.565366 | 0.639544        |           |             |
| Hepatic_age_gap         |                                         | -0.53253 | 0.321599 | 0.089042        |           |             |
| Immune_age_gap          |                                         | -0.15001 | 0.356513 | 0.868225        |           |             |
| Musculoskeletal_age_gap |                                         | -0.26633 | 0.440294 | 0.827824        |           |             |
| Metabolic_age_gap       |                                         | -0.3153  | 0.391594 | 0.866896        |           |             |
| Pulmonary_age_gap       |                                         | -0.18056 | 0.375253 | 0.210053        |           |             |
| Renal_age_gap           |                                         | -0.33425 | 0.403767 | 0.573389        |           |             |
| Brain_age_gap           | Telomere length                         | -0.05796 | 0.55584  | 0.713688        | 34611362  | 472,174     |
| Cardiovascular_age_gap  |                                         | -0.32007 | 0.294362 | 0.421771        |           |             |
| Eye_age_gap             |                                         | -0.11877 | 0.49709  | 0.926991        |           |             |
| Hepatic_age_gap         |                                         | -0.00755 | 0.332263 | 0.792948        |           |             |
| Immune_age_gap          |                                         | -0.3321  | 0.126005 | <b>0.002502</b> |           |             |
| Metabolic_age_gap       |                                         | -0.07943 | 0.45872  | 0.705827        |           |             |
| Musculoskeletal_age_gap |                                         | -0.15992 | 0.478106 | 0.821179        |           |             |
| Pulmonary_age_gap       |                                         | -0.67193 | 0.198345 | <b>3.57E-16</b> |           |             |
| Renal_age_gap           |                                         | -0.17496 | 0.500093 | 0.6767          |           |             |

823



824 **eTable 7: Selected 17 clinical traits for Mendelian randomization analyses.** We unbiasedly  
 825 and systematically selected 17 clinical traits, including chronic diseases affecting multiple organ  
 826 systems, cognition, and lifestyle factors. The selection procedure is detailed in the main text  
 827 **(Method 2J).**  
 828

| Primary organ system | Trait                        | PubMed ID | IEU-ID (If applicable)                   | Number of IVs (forward MR) |
|----------------------|------------------------------|-----------|------------------------------------------|----------------------------|
| Brain                | AD                           | 24162737  | ebi-a-GCST002245                         | 10                         |
|                      | BIP                          | 31043756  | ieu-a-1126                               | 12                         |
| Metabolic            | Type 2 diabetes              | 22885922  | ieu-a-26                                 | 10                         |
|                      | Triglyceride-to-lipid ratio  | 32114887  | XL_VLDL_TG_pct<br>finn-b-<br>H7_GLAUCOMA | 41                         |
| Eye                  | Glaucoma                     | NA        | finn-b-<br>H7_GLAUCOMA                   | 9                          |
| Musculoskeletal      | RA                           | 23143596  | ebi-a-GCST005569                         | 11                         |
| Hepatic              | PBC                          | 26394269  | ebi-a-GCST003129                         | 16                         |
| Digestive            | CD                           | 26192919  | ieu-a-12                                 | 77                         |
|                      | IBD                          | 23128233  | ieu-a-292                                | 81                         |
| Breast               | Breast cancer                | 29059683  | ieu-a-1126                               | 86                         |
| Cognition            | Reaction time                | NA        | Local-UKBB                               | 18                         |
| Lifestyle            | Coffee intake                | NA        | Local-UKBB                               | 11                         |
|                      | Fresh fruit                  | NA        | Local-UKBB                               | 15                         |
|                      | Tea intake                   | NA        | Local-UKBB                               | 12                         |
|                      | Sleep duration               | NA        | Local-UKBB                               | 8                          |
|                      | Summer outdoor activity hour | NA        | Local-UKBB                               | 14                         |
|                      | Body weight                  | NA        | Local-UKBB                               | 161                        |

829  
 830  
 831

832 **References**

- 833 1. Bowden, J. *et al.* A framework for the investigation of pleiotropy in two-sample summary  
834 data Mendelian randomization. *Stat Med* **36**, 1783–1802 (2017).
- 835 2. Burgess, S. & Thompson, S. G. Interpreting findings from Mendelian randomization using the  
836 MR-Egger method. *Eur J Epidemiol* **32**, 377–389 (2017).
- 837 3. Wen, J. *et al.* Novel genomic loci and pathways influence patterns of structural covariance in  
838 the human brain. 2022.07.20.22277727 Preprint at  
839 <https://doi.org/10.1101/2022.07.20.22277727> (2022).
- 840 4. Zhao, B. *et al.* Genome-wide association analysis of 19,629 individuals identifies variants  
841 influencing regional brain volumes and refines their genetic co-architecture with cognitive and  
842 mental health traits. *Nat Genet* **51**, 1637–1644 (2019).
- 843 5. Zhao, B. *et al.* Common genetic variation influencing human white matter microstructure.  
844 *Science* **372**, (2021).
- 845 6. Zhao, B. *et al.* Common variants contribute to intrinsic human brain functional networks. *Nat*  
846 *Genet* **54**, 508–517 (2022).
- 847 7. Deelen, J. *et al.* A meta-analysis of genome-wide association studies identifies multiple  
848 longevity genes. *Nat Commun* **10**, 3669 (2019).
- 849 8. Hill, W. D. *et al.* Genome-wide analysis identifies molecular systems and 149 genetic loci  
850 associated with income. *Nat Commun* **10**, 5741 (2019).
- 851 9. Codd, V. *et al.* Polygenic basis and biomedical consequences of telomere length variation. *Nat*  
852 *Genet* **53**, 1425–1433 (2021).
- 853
